# Supplementary material for: Ru(ii)-catalyzed synthesis of poly-substituted furans via intermolecular oxidative annulation reaction of ethyl 3-oxo-3-phenylpropanoates with aryl alkynes/heteroaryl alkynes
Source: Royal Society of Chemistry journal article supplement (doi:10.1039/d3cc00975k), 2023-01-01

## Supporting Information

### **Ru(II)-Catalyzed Synthesis of Poly-Substituted Furans via Intramolecular Oxidative Annulation Reaction of Ethyl 3-oxo-3-phenylpropanoates with Diaryl alkynes/ Heteroaryl alkynes**

Mohit Chourasiya, Amrendra Kumar, Vikrant Nawal Vikram and Narender Tadigoppula

Medicinal and Process Chemistry Division, CSIR-Central Drug Research, Institute, Lucknow-226031, India

---

#### Table of Contents

|                                                                            |              |
|----------------------------------------------------------------------------|--------------|
| <b>1. General Information .....</b>                                        | <b>2</b>     |
| <b>2. General Procedure for the Preparation of Alkynes .....</b>           | <b>2</b>     |
| <b>3. General Procedure for the Preparation of Substituted Furan .....</b> | <b>2</b>     |
| <b>4. Spectral data of Internal Alkynes .....</b>                          | <b>3-4</b>   |
| <b>5. References .....</b>                                                 | <b>4</b>     |
| <b>6. Spectral data of the Obtained Compound .....</b>                     | <b>5-14</b>  |
| <b>7. Copies of NMR Spectra .....</b>                                      | <b>15-89</b> |
| <b>8. Control experiments.....</b>                                         | <b>90</b>    |

## 1. General Information

All reagents and solvents were purchased from commercial sources and used as received. The progress of the reaction was monitored by analytical TLC on silica gel G/GF 254 plates. The column chromatography was performed with silica gel 100-200 mesh.  $^1\text{H}$  and  $^{13}\text{C}$  NMR spectra were recorded on a 300 MHz or 400 MHz or 100MHz instrument respectively using TMS as an internal standard and chemical shifts are presented in  $\delta$  ppm. Melting points are uncorrected were determined in capillary tubes on a hot stage melting point apparatus containing silicon oil. High resolution mass spectra were taken with a 3000 mass spectrometer and Q-TOF Analyzer. IR spectra were recorded using FTIR spectrophotometer.

## 2. General Procedure for the Preparation of Alkynes

$[\text{Pd}(\text{PPh}_3)\text{Cl}_2]_2$  (2 mol%), CuI (4 mol%),  $\text{Et}_3\text{N}$  (2 equiv.) and iodobenzene (1.1 equiv.) were dissolved in 10.0 mL  $\text{NEt}_3$  at room temperature. Subsequently, phenylacetylene (1.0 equiv.) was added to the resulting mixture by syringe, and the reaction was stirred under argon atmosphere for 10 h. After the solvent was removed and extracted with  $\text{CH}_2\text{Cl}_2$  (4 $\times$ 50 mL). The combined organic layer was washed with brine, dried over  $\text{Na}_2\text{SO}_4$ , concentrated under reduced pressure to give crude alkyne<sup>1</sup>. The residue was purified by silica gel flash chromatography using petroleum ether to afford the desired product.

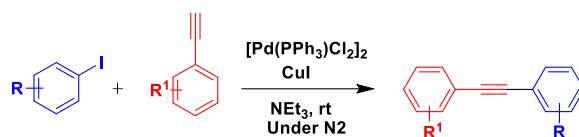

## 3. General Procedure for the Preparation of Substituted Furans

In an oven dried 50 ml R.B. flask charged with stir bar, Ethyl 3-(4-methoxyphenyl)-3-oxopropionate (1.0 equiv.), diarylalkyne (1.0 equiv.),  $[\text{RuCl}_2(\text{pymene})]_2$  (5 mol%),  $\text{Cu}(\text{OAc})_2 \cdot \text{H}_2\text{O}$  (1.0 equiv.) and  $\text{AgSbF}_6$  (20 mol%) in 2 ml DCE, resulting mixture was stirred at 120 °C with oil bath for 6 h. Completion of reaction was monitored by TLC (1:20 Ethyl acetate and Hexane). Reaction mixture was cooled down to room temperature and diluted with 10 mL of  $\text{H}_2\text{O}$ . The resultant mixture was extracted with DCM (3  $\times$  15 mL). The combined organic phase was dried over anhydrous  $\text{Na}_2\text{SO}_4$ . After removal of the solvent under reduced pressure, the crude product was purified by column chromatography on silica gel (100-200 mesh) by using hexane/ethyl acetate solvent system to give the desired product tetrasubstituted furan compounds.

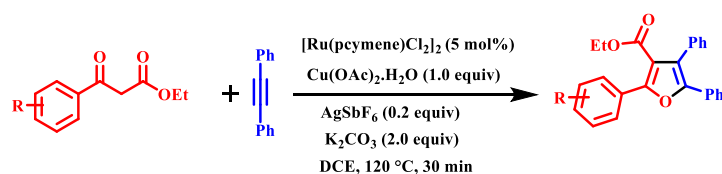

## 4. Spectral data of Internal Alkynes

### 1,2-di-p-tolyne (2b)

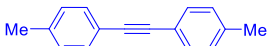 Yield 88% (181 mg); White solid; (KBr)  $\text{cm}^{-1}$ :  $^1\text{H NMR}$  (400 MHz,  $\text{CDCl}_3$ ):  $\delta$  7.40 (d,  $J = 8.0\text{ Hz}$ , 4H), 7.12 (d,  $J = 7.8\text{ Hz}$ , 4H), 2.34 (s, 6H);  $^{13}\text{C NMR}$  (100 MHz,  $\text{CDCl}_3$ ):  $\delta$  138.1, 132.4, 129.1, 120.4, 88.9, 21.5; mass ESI-MS( $m/z$ ) = 207.20 ( $\text{M}+\text{H}$ ) $^+$ ; HRMS (ESI)  $m/z$  [ $\text{M}+\text{H}$ ] $^+$ calcd for  $\text{C}_{16}\text{H}_{15}$  207.1174 Found 207.1179

### 1,2-bis(4-methoxyphenyl)ethyne (2c)

 Yield 89% (212 mg); White solid; (KBr)  $\text{cm}^{-1}$ :  $^1\text{H NMR}$  (400 MHz,  $\text{CDCl}_3$ ):  $\delta$  7.46-7.44 (d,  $J = 8.8\text{ Hz}$ , 4H), 6.88-6.86 (d,  $J = 8.8\text{ Hz}$ , 4H), 3.82 (s, 6H);  $^{13}\text{C NMR}$  (100 MHz,  $\text{CDCl}_3$ ):  $\delta$  159.4, 132.8, 115.7, 113.9, 87.9, 55.3; mass ESI-MS( $m/z$ ) = 239.10 ( $\text{M}+\text{H}$ ) $^+$ ; HRMS (ESI)  $m/z$  [ $\text{M}+\text{H}$ ] $^+$ calcd for  $\text{C}_{16}\text{H}_{15}$  239.1072 Found 207.1179.

### 1,2-bis(4-fluorophenyl)ethyne (2d)

 Yield 72% (154 mg); White solid;  $^1\text{H NMR}$  (400 MHz,  $\text{CDCl}_3$ ):  $\delta$  7.51-7.48 (m, 4H), 7.06-7.02 (m, 4H);  $^{13}\text{C NMR}$  (100 MHz,  $\text{CDCl}_3$ ):  $\delta$  162.8 (d, C-F,  $^1\text{J}_{\text{C-F}} = 253.0\text{ Hz}$ ), 134.4 (d, C-F,  $^3\text{J}_{\text{C-F}} = 8.6\text{ Hz}$ ), 133.4 (d, C-F,  $^3\text{J}_{\text{C-F}} = 8.7\text{ Hz}$ ), 119.2 (d, C-F,  $^4\text{J}_{\text{C-F}} = 3.4\text{ Hz}$ ), 115.5 (d, C-F,  $^2\text{J}_{\text{C-F}} = 22.5\text{ Hz}$ ), 88.0;  $^{19}\text{F NMR}$  (376 MHz,  $\text{CDCl}_3$ ):  $\delta$  112.3 (s), 115.2 (s); mass ESI-MS( $m/z$ ) = 215.03 ( $\text{M}+\text{H}$ ) $^+$ ; HRMS (ESI)  $m/z$  [ $\text{M}+\text{H}$ ] $^+$ calcd for  $\text{C}_{14}\text{H}_9\text{F}_2$  215.0720 Found 215.0687.

### 1,2-bis(4-(tert-butyl)phenyl)ethyne (2e)

 Yield 89% (258 mg); White solid;  $^1\text{H NMR}$  (400 MHz,  $\text{CDCl}_3$ ):  $\delta$  7.46-7.43 (m, 4H), 7.36-7.32 (m, 4H), 1.31 (s, 9H), 1.30 (s, 9H);  $^{13}\text{C NMR}$  (100 MHz,  $\text{CDCl}_3$ ):  $\delta$  151.3, 137.1, 132.2, 127.6, 125.5, 120.5, 88.9, 34.9, 34.8, 31.2; mass ESI-MS( $m/z$ ) = 291.2 ( $\text{M}+\text{H}$ ) $^+$ ; HRMS (ESI)  $m/z$  [ $\text{M}+\text{H}$ ] $^+$ calcd for  $\text{C}_{22}\text{H}_{27}$  291.2113; Found 291.2108

### 1,2-bis(4-bromophenyl)ethyne (2f)

 Yield 81% (270 mg); White solid;  $^1\text{H NMR}$  (400 MHz,  $\text{CDCl}_3$ ):  $\delta$  7.49-7.47 (d,  $J = 8.5\text{ Hz}$ , 4H), 7.38-7.36 (d,  $J = 8.5\text{ Hz}$ , 4H);  $^{13}\text{C NMR}$  (100 MHz,  $\text{CDCl}_3$ ):  $\delta$  138.1, 132.4, 129.1, 120.4, 88.9, 21.5; mass ESI-MS( $m/z$ ) = 334.90 ( $\text{M}+\text{H}$ ) $^+$ ; HRMS (ESI)  $m/z$  [ $\text{M}+\text{H}$ ] $^+$ calcd for  $\text{C}_{14}\text{H}_9\text{Br}_2$  334.9071 Found 334.1179

### 1,2-di-m-tolyne (2g)

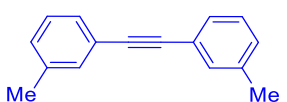 Yield 84% (173 mg); White solid; (KBr)  $\text{cm}^{-1}$ :  $^1\text{H NMR}$  (400 MHz,  $\text{CDCl}_3$ ):  $\delta$  7.39 (s, 2H), 7.38-7.36 (d,  $J = 8.1\text{ Hz}$ , 2H), 7.28-7.25 (t,  $J = 7.5\text{ Hz}$ , 2H), 7.18-7.16 (d,  $J = 7.5\text{ Hz}$ , 2H);  $^{13}\text{C NMR}$  (100 MHz,  $\text{CDCl}_3$ ):  $\delta$  138.0, 132.2, 129.1, 128.6, 128.2, 123.2, 89.2, 21.2; mass ESI-MS( $m/z$ ) = 207.20 ( $\text{M}+\text{H}$ ) $^+$ ; HRMS (ESI)  $m/z$  [ $\text{M}+\text{H}$ ] $^+$ calcd for  $\text{C}_{16}\text{H}_{15}$  207.1174 Found 207.1179.

### 1-fluoro-4-(p-tolyne)benzene (2h)

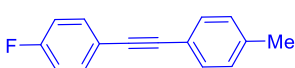 Yield 79% (166 mg); white solid; mp 123-128°C; (KBr)  $\text{cm}^{-1}$ :  $^1\text{H NMR}$  (400 MHz,  $\text{CDCl}_3$ ):  $\delta$  7.48-7.51 (m, 2H), 7.40-7.43 (d,  $J = 8.16\text{ Hz}$ , 2H), 7.15-7.17 (d,  $J = 7.98\text{ Hz}$ , 2H), 7.01-7.06 (t,  $J = 8.84\text{ Hz}$ , 2H), 2.37 (s, 3H);  $^{13}\text{C NMR}$  (100 MHz,  $\text{CDCl}_3$ ):  $\delta$  162.40 (d, C-F  $^1\text{J}_{\text{C-F}} = 248.9\text{ Hz}$ ), 138.49, 133.40 (d, C-F  $^3\text{J}_{\text{C-F}} = 8.21\text{ Hz}$ ), 131.45, 129.15, 120.01, 119.59 (d, C-F  $^4\text{J}_{\text{C-F}} = 3.66\text{ Hz}$ ), 115.59 (d, C-F  $^2\text{J}_{\text{C-F}} = 22.14\text{ Hz}$ ), 89.22, 87.64, 21.50; mass (ES+)  $m/z$  = 211.09.

### 1-chloro-4-((4-methoxyphenyl)ethynyl)benzene (2i)

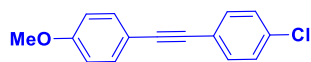

Yield 83% (200 mg); white solid; mp 123-128 °C; (KBr)  $\text{cm}^{-1}$ :  $^1\text{H}$  NMR (400 MHz,  $\text{CDCl}_3$ ):  $\delta$  7.44-7.46 (d,  $J = 8.86$  Hz, 2H), 7.41-7.43 (d,  $J = 8.60$  Hz, 2H), 7.29-7.31 (d,  $J = 8.60$  Hz, 2H), 7.25 (s), 6.86-6.88 (d,  $J = 8.81$  Hz, 2H), 3.82 (s, 3H);  $^{13}\text{C}$  NMR (100 MHz,  $\text{CDCl}_3$ ):  $\delta$  159.80, 133.88, 133.08, 132.64, 128.64, 122.15, 115.04, 114.07, 90.37, 87.00, 55.32; mass (ES+)  $m/z = 243.05$ .

### 1,2-di(thiophen-3-yl)ethyne (2k)

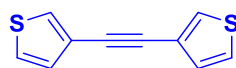

Yield 78% (147 mg); White solid; (KBr)  $\text{cm}^{-1}$ :  $^1\text{H}$  NMR (400 MHz,  $\text{CDCl}_3$ ):  $\delta$  7.57-7.56 (m, 2H), 7.35-7.33 (dd,  $J = 3.0$  Hz, 2H), 7.25-7.24 (d,  $J = 5.0$  Hz, 2H);  $^{13}\text{C}$  NMR (100 MHz,  $\text{CDCl}_3$ ):  $\delta$  129.7, 128.4, 125.3, 122.1, 84.0; mass ESI-MS( $m/z$ ) = 190.9 ( $\text{M}+\text{H}$ ) $^+$ ; HRMS (ESI)  $m/z$  [ $\text{M}+\text{H}$ ] $^+$  calcd for  $\text{C}_{10}\text{H}_6\text{S}_2$  190.9989 Found 190.1179.

## 1. References

1. Doucet, H.; Hierso, J. C.; *Angew. Chem., Int. Ed.*, **2007**, 46, 834.
2. Stuart, D.R.; Laperle, M. B.; Burgess, K. M. N.; Fagnou, K. *J. Am. Chem. Soc.*, **2008**, 130, 16474.

## 4. Spectral data of the Obtained Compound

### Ethyl 2,4,5-triphenylfuran-3-carboxylate (3aa)

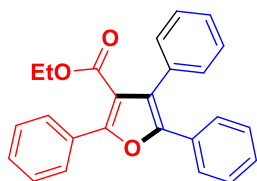

Eluent: Hexane/EA = 95:05,  $R_f$  = 0.63; Yield 67% (246 mg); light yellow oil; (KBr)  $\text{cm}^{-1}$ : 816, 1082, 1222, 1340, 1451, 1498, 1556, 1657, 1702, 2919,  $\text{cm}^{-1}$ ;  $^1\text{H NMR}$  (400 MHz,  $\text{CDCl}_3$ ):  $\delta$  7.85 (dd,  $J$  = 8.5 Hz,  $J$  = 1.5 Hz, 2H), 7.38-7.34 (m, 5H), 7.33-7.29 (m, 5H), 7.19-7.13 (m, 3H), 3.99 (q,  $J$  = 7.2 Hz, 2H), 0.86 (s, 3H);  $^{13}\text{C NMR}$  (100 MHz,  $\text{CDCl}_3$ ):  $\delta$  164.4, 154.8, 147.9, 139.3, 133.5, 130.3, 130.0, 128.9, 128.4, 127.8, 127.7, 164.2, 154.2, 148.2, 133.2, 130.1, 130.0, 129.8, 129.0, 128.8, 128.3, 128.2, 127.7, 127.6, 123.6, 60.5, 13.05; mass (ES+)  $m/z$  = 369.14 ( $\text{M}+\text{H}$ ) $^+$ ; HRMS (ESI-TOF) calcd for  $\text{C}_{25}\text{H}_{21}\text{O}_3$  369.1491 Found 369.1480.

### Ethyl 4,5-bis(4-methoxyphenyl)-2-phenylfuran-3-carboxylate (3ac)

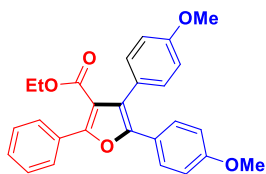

Eluent: Hexane/EA = 80:20,  $R_f$  = 0.61; Yield 74% (316 mg); light yellow oil. (KBr)  $\text{cm}^{-1}$ : 769, 836, 1030, 1113, 1248, 1331, 1462, 1514, 1603, 1717, 2958  $\text{cm}^{-1}$ ;  $^1\text{H NMR}$  (400 MHz,  $\text{CDCl}_3$ ):  $\delta$  7.8 (d,  $J$  = 7.5 Hz, 2H), 7.46-7.37 (m, 5H), 7.28 (d,  $J$  = 8.7 Hz, 2H), 6.94 (d,  $J$  = 8.5 Hz, 2H), 6.79 (d,  $J$  = 8.8 Hz, 2H), 4.11 (q,  $J$  = 7.2 Hz, 2H), 3.86 (s, 3H), 3.78 (s, 3H), 1.0 (t,  $J$  = 1.0 Hz, 3H);  $^{13}\text{C NMR}$  (100 MHz,  $\text{CDCl}_3$ ):  $\delta$  164.6, 159.2, 159.0, 153.6, 148.6, 135.3, 131.3, 130.0, 128.9, 128.3, 127.7, 125.5, 125.0, 123.0, 121.9, 116.9, 113.9, 60.6, 55.3, 55.3, 13.8; mass (ES+)  $m/z$  = 429.18 ( $\text{M}+\text{H}$ ) $^+$ ; HRMS (ESI-TOF) calcd for  $\text{C}_{27}\text{H}_{25}\text{O}_5$  429.1697 Found 429.1693.

### Ethyl 4,5-bis(4-fluorophenyl)-2-phenylfuran-3-carboxylate (3ad)

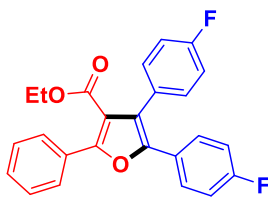

Eluent: Hexane/EA = 80:20,  $R_f$  = 0.51; Yield 63% (254 mg); light yellow oil. (KBr)  $\text{cm}^{-1}$ : 747, 845, 1015, 1160, 1233, 1471, 1585, 1730, 3022  $\text{cm}^{-1}$ ;  $^1\text{H NMR}$  (400 MHz,  $\text{CDCl}_3$ ):  $\delta$  7.48-7.88 (m, 2H), 7.48-7.33 (m, 7H), 7.11 (t,  $J$  = 8.8 Hz, 2H), 6.95 (t,  $J$  = 8.8 Hz, 2H), 4.11-4.06 (q,  $J$  = 7.1 Hz, 2H), 1.01-0.97 (t,  $J$  = 0.9 Hz, 3H);  $^{13}\text{C NMR}$  (100 MHz,  $\text{CDCl}_3$ ):  $\delta$  164.1, 162.6 (d, C-F  $^1\text{JC-F}$  = 248.1 Hz), 162.4 (d, C-F  $^1\text{JC-F}$  = 249.4 Hz), 154.8, 147.9, 131.9 (d, C-F  $^3\text{JC-F}$  = 8.1 Hz), 129.8, 129.4, 129.1 (d, C-F  $^4\text{JC-F}$  = 3.3 Hz), 128.4, 128.0, 127.8 (d, C-F  $^3\text{JC-F}$  = 8.1 Hz), 127.7, 126.3 (d, C-F  $^4\text{JC-F}$  = 3.5 Hz), 122.4, 115.7 (d, C-F  $^2\text{JC-F}$  = 21.8 Hz), 115.7 (d, C-F  $^2\text{JC-F}$  = 21.8 Hz), 60.7, 13.7; mass (ES+)  $m/z$  = 405.13 ( $\text{M}+\text{H}$ ) $^+$ ; HRMS (ESI-TOF) calcd for  $\text{C}_{25}\text{H}_{19}\text{F}_2\text{O}_3$  405.1302 Found 405.1303.

### Ethyl 4,5-diphenyl-2-(o-tolyl)furan-3-carboxylate (3ba)

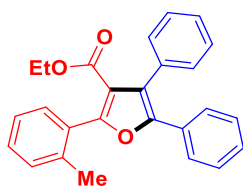

Eluent: Hexane/EA = 95:05,  $R_f$  = 0.53; Yield 70% (267 mg); light yellow solid. mp 125-130  $^{\circ}\text{C}$ ; (KBr)  $\text{cm}^{-1}$ : 698, 732, 1022, 1102, 1263, 1329, 1714, 2925  $\text{cm}^{-1}$ ;  $^1\text{H NMR}$  (400 MHz,  $\text{CDCl}_3$ ):  $\delta$  7.59-7.61 (d,  $J$  = 7.5 Hz, 1H), 7.47-7.51 (m, 6H), 7.28-7.45 (m, 7H), 4.03-4.08 (q,  $J$  = 7.1 Hz, 2H), 2.50 (s, 3H) 0.93-0.97 (t,  $J$  = 7.2 Hz, 2H);  $^{13}\text{C NMR}$  (100 MHz,  $\text{CDCl}_3$ ):  $\delta$  163.4, 156.7, 148.6, 137.8, 133.3, 130.8, 130.2, 130.1, 129.5, 128.3, 127.6, 127.6, 125.6, 125.2, 122.7, 117.6, 60.1, 20.3, 13.4; mass (ES+)  $m/z$  = 383.16 ( $\text{M}+\text{H}$ ) $^+$ ; HRMS (ESI-TOF) calcd for  $\text{C}_{26}\text{H}_{23}\text{O}_3$  383.1647 Found 383.1637.

### Ethyl 2-(2-fluorophenyl)-4,5-diphenylfuran-3-carboxylate (3ca)

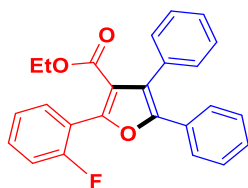

Eluent: Hexane/EA = 90:10,  $R_f$  = 0.51; Yield 61% (235 mg); light yellow solid. mp 130-135  $^{\circ}\text{C}$ ; (KBr)  $\text{cm}^{-1}$ : 759, 843, 949, 1088, 1175, 1227, 1332, 1446, 1598, 1721, 2960  $\text{cm}^{-1}$ ;  $^1\text{H NMR}$  (400 MHz,  $\text{CDCl}_3$ ):  $\delta$  7.76-7.72 (td,  $J$  = 7.4 Hz,  $J$  = 1.7 Hz, 1H), 7.43-7.38 (m, 7H), 7.29-7.14 (m, 6H), 4.09-4.03 (q,  $J$  = 7.1 Hz, 2H), 0.98-0.94 (t,  $J$  = 7.2 Hz, 2H);  $^{13}\text{C NMR}$  (100 MHz,  $\text{CDCl}_3$ ):  $\delta$  163.4, 159.7 (d, C-F  $^1\text{JC-F}$  = 251.3 Hz), 149.3, 132.7, 131.0 (d, C-F  $^3\text{JC-F}$  = 8.2 Hz), 130.5, 130.2, 130.0, 128.3, 127.8, 127.7, 125.8, 123.9 (d, C-F  $^4\text{JC-F}$  = 3.6 Hz), 123.2, 119.1, 118.5, 116.0, 115.9 (d, C-F  $^2\text{JC-F}$  = 21.9), 60.4, 13.5; mass (ES+)  $m/z$  = 387.13 ( $\text{M}+\text{H}$ ) $^+$ ; HRMS (ESI-TOF) calcd for  $\text{C}_{25}\text{H}_{20}\text{FO}_3$  387.1396 Found 387.1395.

### Ethyl 4,5-diphenyl-2-(*m*-tolyl)furan-3-carboxylate (3da)

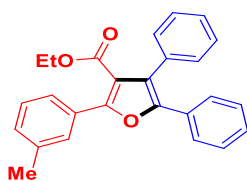

Eluent: Hexane/EA = 95:05,  $R_f$  = 0.61; Yield 69% (263 mg); light yellow solid; (KBr)  $\text{cm}^{-1}$ : 791, 827, 949, 1069, 1161, 1230, 1329, 1498, 1592, 1675, 1715, 2924  $\text{cm}^{-1}$ ;  $^1\text{H}$  NMR (400 MHz,  $\text{CDCl}_3$ ):  $\delta$  7.64-7.66 (d,  $J$  = 7.2 Hz, 2H), 7.28-7.38 (m, 8H), 7.13-7.19 (m, 4H), 3.98-4.03 (q,  $J$  = 7.1 Hz, 2H), 2.36 (s, 3H), 0.87-0.91 (t,  $J$  = 7.2 Hz, 2H);  $^{13}\text{C}$  NMR (100 MHz,  $\text{CDCl}_3$ ):  $\delta$  164.3, 154.4, 148.1, 137.8, 133.3, 130.1, 130.0, 129.9, 129.7, 128.4, 128.3, 128.3, 128.2, 127.7, 127.6, 125.8, 125.0, 123.7, 116.8, 60.5, 21.5, 13.5; mass (ES+)  $m/z$  = 383.16 (M+H) $^+$ ; HRMS (ESI-TOF) calcd for  $\text{C}_{26}\text{H}_{23}\text{O}_3$  383.1647 Found 383.1643.

### Ethyl 4,5-bis(4-methoxyphenyl)-2-(*m*-tolyl)furan-3-carboxylate (3dc)

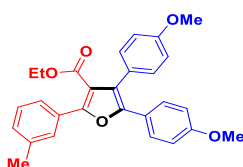

Eluent: Hexane/EA = 90:10,  $R_f$  = 0.42; Yield 75% (331 mg); light orange oil. (KBr)  $\text{cm}^{-1}$ : 701, 1031, 1175, 1262, 1515, 1607, 1712, 3355  $\text{cm}^{-1}$ ;  $^1\text{H}$  NMR (400 MHz,  $\text{CDCl}_3$ ):  $\delta$  7.66-7.68 (m, 2H), 7.25-7.39 (m, 5H), 7.18-7.21 (m, 1H), 6.92-6.94 (d,  $J$  = 8.7 Hz, 2H), 6.77-6.80 (d,  $J$  = 9.0, 2H), 4.07-4.12 (q,  $J$  = 7.1 Hz, 2H), 3.8 (s, 3H), 3.7 (s, 3H), 2.42 (s, 3H), 1.00-1.03 (t,  $J$  = 7.2 Hz, 2H);  $^{13}\text{C}$  NMR (100 MHz,  $\text{CDCl}_3$ ):  $\delta$  164.5, 159.1, 159.0, 150.7, 148.4, 137.8, 131.2, 130.2, 129.9, 129.6, 128.2, 128.1, 127.2, 125.5, 124.9, 123.1, 121.7, 116.8, 113.8, 60.5, 55.2, 21.5, 13.7; mass (ES+)  $m/z$  = 443.18 (M+H) $^+$ ; HRMS (ESI-TOF) calcd for  $\text{C}_{28}\text{H}_{27}\text{O}_5$  443.1858 Found 443.1848.

### Ethyl 4,5-bis(4-(*tert*-butyl)phenyl)-2-(*m*-tolyl)furan-3-carboxylate (3de)

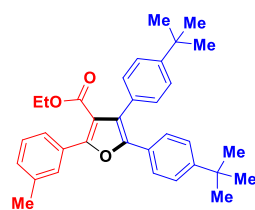

Eluent: Hexane/EA = 95:05,  $R_f$  = 0.56; Yield 71% (350 mg); light yellow solid. mp 102-125  $^{\circ}\text{C}$ ; (KBr)  $\text{cm}^{-1}$ : 737, 835, 1035, 1113, 1230, 1267, 1330, 1405, 1517, 1657, 1718, 2960  $\text{cm}^{-1}$ ;  $^1\text{H}$  NMR (400 MHz,  $\text{CDCl}_3$ ):  $\delta$  7.71-7.73 (d,  $J$  = 7.22 Hz, 2H), 7.74-7.44 (m, 4H), 7.27-7.36 (m, 5H), 7.21-7.23 (d,  $J$  = 7.75 Hz, 1H), 4.04-4.09 (q,  $J$  = 7.1 Hz, 2H), 2.4 (s, 3H), 1.39 (s, 9H), 1.30 (s, 9H), 0.08-0.93 (t,  $J$  = 6.99 Hz, 2H);  $^{13}\text{C}$  NMR (100 MHz,  $\text{CDCl}_3$ ):  $\delta$  164.5, 153.9, 150.6, 150.4, 148.1, 137.8, 130.3, 129.9, 129.7, 129.5, 128.2, 128.1, 127.5, 125.3, 125.3, 125.2, 124.8, 123.0, 117.1, 60.4, 34.6, 31.4, 31.2, 21.5, 13.4 mass (ES+)  $m/z$  = 495.28 (M+H) $^+$ ; HRMS (ESI-TOF) calcd for  $\text{C}_{34}\text{H}_{39}\text{O}_3$  495.2899 Found 495.2891.

### Ethyl 2-(4-bromophenyl)-4,5-bis(4-methoxyphenyl)furan-3-carboxylate (3dd)

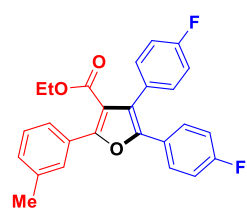

Eluent: Hexane/EA = 90:10,  $R_f$  = 0.51; Yield 64% (267 mg); light yellow solid. (KBr)  $\text{cm}^{-1}$ : 705, 845, 950, 1021, 1130.3, 1232, 1335, 1448, 1600, 1721, 2995  $\text{cm}^{-1}$ ;  $^1\text{H}$  NMR (400 MHz,  $\text{CDCl}_3$ ): 7.67-7.69 (d,  $J$  = 6.5 Hz, 2H), 7.31-7.39 (m, 5H), 7.22-7.24 (d,  $J$  = 7.5 Hz, 1H), 7.09-7.13 (t,  $J$  = 8.8 Hz, 2H), 6.93-6.97 (t,  $J$  = 8.8 Hz, 2H), 4.06-4.11 (q,  $J$  = 7.2 Hz), 2.43 (s, 3H), 1.55 (s, 3H), 0.99-1.02 (t,  $J$  = 7.16 Hz);  $^{13}\text{C}$  NMR (100 MHz,  $\text{CDCl}_3$ ):  $\delta$  164.0, 162.4 (d, C-F  $^1J$  C-F = 246.5 Hz), 162.2 (d, C-F  $^1J$  C-F = 248.7 Hz), 154.8, 147.6, 137.9, 131.7 (d, C-F  $^3J$  C-F = 8.1 Hz), 130.1, 129.5, 129.0 (d, C-F  $^4J$  C-F = 3.2 Hz), 128.4, 128.1, 127.6 (d, C-F  $^3J$  C-F = 8.1 Hz), 126.2 (d, C-F  $^4J$  C-F = 3.1 Hz), 125.1, 122.2, 116.6 (d, C-F  $^2J$  C-F = 21.7 Hz), 60.6, 21.5, 13.6; mass (ES+)  $m/z$  = 419.14 (M+H) $^+$ ; HRMS (ESI-TOF) calcd for  $\text{C}_{26}\text{H}_{21}\text{F}_2\text{O}_3$  419.1459 Found 419.1450.

### Ethyl 4,5-diphenyl-2-(*p*-tolyl)furan-3-carboxylate (3ea)

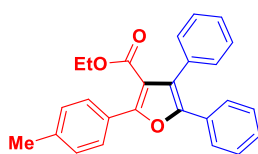

Eluent: Hexane/EA = 95:05,  $R_f$  = 0.39; Yield 69% (263 mg); light yellow oil. (KBr)  $\text{cm}^{-1}$ ; (KBr)  $\text{cm}^{-1}$ : 819, 1085, 1232, 1365, 1460, 1504, 1604, 1715, 2923,  $\text{cm}^{-1}$ ;  $^1\text{H}$  NMR (400 MHz,  $\text{CDCl}_3$ ):  $\delta$  7.82 (d,  $J$  = 8.0 Hz, 2H), 7.43-7.35 (m, 7H), 7.27-7.21 (m, 6H), 4.05 (q,  $J$  = 7.2 Hz, 2H), 2.41 (s, 3H), 0.93 (t,  $J$  = 0.9 Hz, 3H);  $^{13}\text{C}$  NMR (100 MHz,  $\text{CDCl}_3$ ):  $\delta$  164.4, 154.8, 147.9, 139.3, 133.5, 130.3, 130.0, 128.9, 128.4, 127.8, 127.7, 127.6, 127.0, 125.8, 123.7, 116.5, 60.5, 21.5, 13.6; mass (ES+)  $m/z$  = 383.11 (M+H) $^+$ ; HRMS(ESI-TOF) calcd for  $\text{C}_{26}\text{H}_{23}\text{O}_3$  383.1642 Found 383.1662.

### Ethyl 2,4,5-tri-p-tolylfuran-3-carboxylate (3eb)

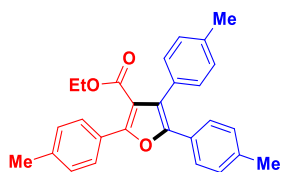

Eluent: Hexane/EA = 95:05,  $R_f$  = 0.27; Yield 72% (295 mg); light yellow oil. (KBr)  $\text{cm}^{-1}$ : 758, 818, 923, 1012, 1114, 1219, 1367, 1460, 1507, 1716, 2924  $\text{cm}^{-1}$ ;  $^1\text{H NMR}$  (400 MHz,  $\text{CDCl}_3$ ):  $\delta$  7.81 (d,  $J$  = 8.4 Hz, 2H), 7.32 (d,  $J$  = 7.8 Hz, 2H), 7.25-7.23 (m, 4H), 7.19 (d,  $J$  = 8.0 Hz, 2H), 7.00 (d,  $J$  = 7.9 Hz, 2H), 4.08 (q,  $J$  = 7.2 Hz, 2H), 2.40 (s, 6H), 2.29 (s, 3H), 0.91 (t,  $J$  = 0.9 Hz, 3H);  $^{13}\text{C NMR}$  (100 MHz,  $\text{CDCl}_3$ ):  $\delta$  164.2, 154.2, 148.2, 139.0, 137.5, 137.0, 130.3, 129.9, 129.0, 128.9, 127.8, 127.7, 127.3, 125.8, 122.9, 116.5, 115.9, 60.5, 21.4, 21.3, 21.2, 13.7; mass(ES+)  $m/z$  = 411.19 (M+H) $^+$ ; HRMS (ESI-TOF) calcd for  $\text{C}_{28}\text{H}_{27}\text{O}_3$  411.1955 Found 411.1970.

### Ethyl 4,5-bis(4-methoxyphenyl)-2-(p-tolyl)furan-3-carboxylate (3ec)

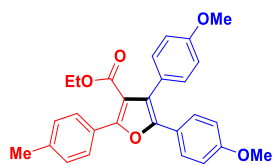

Eluent: Hexane/EA = 80:20,  $R_f$  = 0.46; Yield 73% (322 mg); light red oil. (KBr)  $\text{cm}^{-1}$ : 634, 831, 951, 1031, 1111, 1178, 1247, 1330, 1461, 1507, 1716, 2926  $\text{cm}^{-1}$ ;  $^1\text{H NMR}$  (400 MHz,  $\text{CDCl}_3$ ):  $\delta$  7.78 (d,  $J$  = 8.1 Hz, 2H), 7.36 (d,  $J$  = 9.0 Hz, 2H), 7.27 (d,  $J$  = 8.8 Hz, 2H), 7.24 (d,  $J$  = 7.6 Hz, 2H), 6.93 (d,  $J$  = 9.0 Hz, 2H), 6.78 (d,  $J$  = 9.0 Hz, 2H), 4.09 (q,  $J$  = 7.3 Hz, 2H), 3.86 (s, 3H), 3.77 (s, 3H), 2.40 (s, 3H), 0.91 (t,  $J$  = 0.9 Hz, 3H);  $^{13}\text{C NMR}$  (100 MHz,  $\text{CDCl}_3$ ):  $\delta$  164.4, 159.0, 159.0, 153.9, 148.2, 138.9, 131.3, 128.9, 127.7, 127.4, 127.2, 125.7, 123.2, 121.8, 116.4, 113.9, 113.9, 60.5, 55.3, 55.3, 21.5, 13.8; mass (ES+)  $m/z$  = 443.19 (M+H) $^+$ ; HRMS (ESI-TOF) calcd for  $\text{C}_{28}\text{H}_{27}\text{O}_5$  443.1853 Found 443.1867.

### Ethyl 2-(4-methoxyphenyl)-4,5-diphenylfuran-3-carboxylate (3fa)

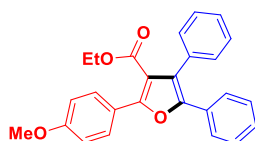

Eluent: Hexane/EA = 90:10,  $R_f$  = 0.43; Yield 69% (274 mg); light green oil. (KBr)  $\text{cm}^{-1}$ : 759, 956, 1101, 1220, 1399, 1469, 1615, 2960, 3020, 3582  $\text{cm}^{-1}$ ;  $^1\text{H NMR}$  (400 MHz,  $\text{CDCl}_3$ ):  $\delta$  7.94 (d,  $J$  = 8.9 Hz, 2H), 7.45-7.39 (m, 7H), 7.26-7.22 (m, 3H), 7.01 (d,  $J$  = 8.9 Hz, 2H), 4.09 (q,  $J$  = 7.0 Hz, 2H), 3.89 (s, 3H), 0.95 (t,  $J$  = 0.9 Hz, 3H);  $^{13}\text{C NMR}$  (100 MHz,  $\text{CDCl}_3$ ):  $\delta$  164.4, 159.4, 159.2, 152.5, 148.9, 134.8, 131.3, 128.9, 128.6, 127.4, 125.4, 122.9, 121.9, 117.4, 113.9, 113.9, 60.7, 55.3, 13.7; mass (ES+)  $m/z$  = 399.15 (M+H) $^+$ ; HRMS (ESI-TOF) calcd for  $\text{C}_{26}\text{H}_{23}\text{O}_4$  399.1591 Found 399.1598.

### Ethyl 2-(4-fluorophenyl)-4,5-diphenylfuran-3-carboxylate (3ga)

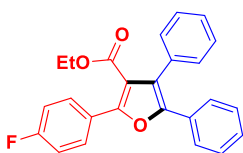

Eluent: Hexane/EA = 90:10,  $R_f$  = 0.62; Yield 63% (243 mg); light yellow solid. mp 118-125  $^{\circ}\text{C}$ ; (KBr)  $\text{cm}^{-1}$ : 841, 1025, 1117, 1218, 1329, 1445, 2925  $\text{cm}^{-1}$ ;  $^1\text{H NMR}$  (400 MHz,  $\text{CDCl}_3$ ):  $\delta$  7.97-7.93 (m, 2H), 7.42-7.34 (m, 7H), 7.25-7.21 (m, 3H), 7.15 (t,  $J$  = 7.1 Hz, 2H), 4.06 (q,  $J$  = 7.0 Hz, 2H), 0.92 (t,  $J$  = 0.9 Hz, 3H);  $^{13}\text{C NMR}$  (100 MHz,  $\text{CDCl}_3$ ):  $\delta$  164.1, 163.1 (d, C-F  $^1\text{J}_{\text{C-F}}$  = 249.7 Hz), 153.7, 148.2, 133.3, 129.9 (d, C-F  $^3\text{J}_{\text{C-F}}$  = 8.7 Hz), 128.4, 127.8, 127.6, 126.1 (d, C-F  $^4\text{J}_{\text{C-F}}$  = 3.1 Hz), 125.7, 123.6, 116.7, 115.3 (d, C-F  $^2\text{J}_{\text{C-F}}$  = 21.8 Hz), 60.5, 13.5; mass (ES+)  $m/z$  = 386.13 (M+H) $^+$ ; HRMS (ESI-TOF) calcd for  $\text{C}_{25}\text{H}_{20}\text{FO}_3$  387.1391 Found 387.1411.

### Ethyl 2-(4-fluorophenyl)-4,5-bis(4-methoxyphenyl)furan-3-carboxylate (3gc)

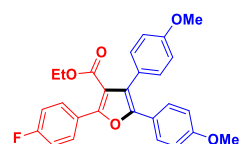

Eluent: Hexane/EA = 90:10,  $R_f$  = 0.29; Yield 65% (289 mg); light yellow oil. (KBr)  $\text{cm}^{-1}$ : 733, 834, 950, 1029, 1081, 1113, 1230, 1331, 1462, 1500, 1712, 2935  $\text{cm}^{-1}$ ;  $^1\text{H NMR}$  (400 MHz,  $\text{CDCl}_3$ ):  $\delta$  7.92-7.89 (m, 2H), 7.37-7.35 (m, 2H), 7.27-7.26 (m, 2H), 7.15-7.10 (m, 2H), 6.95-6.92 (m, 2H), 6.79-6.77 (m, 2H), 4.08 (q,  $J$  = 7.4 Hz, 2H), 3.85 (s, 3H), 3.77 (s, 3H), 1.00 (t,  $J$  = 0.9 Hz, 3H);  $^{13}\text{C NMR}$  (100 MHz,  $\text{CDCl}_3$ ):  $\delta$  164.3, 163.0 (d, C-F  $^1\text{J}_{\text{C-F}}$  = 249.6 Hz), 159.2, 159.0, 152.9, 148.5, 131.2, 129.8 (d, C-F  $^3\text{J}_{\text{C-F}}$  = 8.2 Hz), 127.2, 126.3 (d, C-F  $^4\text{J}_{\text{C-F}}$  = 3.3 Hz), 125.4, 122.9, 121.7, 116.7, 115.3 (d, C-F  $^2\text{J}_{\text{C-F}}$  = 21.6 Hz), 113.8, 60.5, 55.2, 55.2, 13.6; mass (ES+)  $m/z$  = 447.02 (M+H) $^+$ ; HRMS (ESI-TOF) calcd for  $\text{C}_{27}\text{H}_{24}\text{FO}_5$  447.1602 Found 447.1620.

### Ethyl 4,5-bis(4-bromophenyl)-2-(4-fluorophenyl)furan-3-carboxylate (3gf)

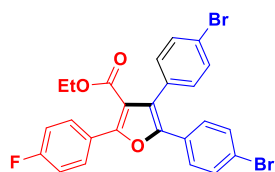

Eluent: Hexane/EA = 90:10,  $R_f$  = 0.62; Yield 59% (319 mg); light yellow oil. (KBr)  $\text{cm}^{-1}$ : 791, 827, 1009, 1115, 1230, 1329, 1498, 1592, 1675, 1715, 2924  $\text{cm}^{-1}$ ;  $^1\text{H NMR}$  (400 MHz,  $\text{CDCl}_3$ ):  $\delta$  7.93 -7.90 (m, 2H), 7.55 (d,  $J$  = 8.4 Hz, 2H), 7.39 (d,  $J$  = 8.7 Hz, 2H), 7.24-7.21 (m, 4H), 7.14 (t,  $J$  = 7.1 Hz, 2H), 4.07 (q,  $J$  = 7.1 Hz, 2H), 0.99 (t,  $J$  = 0.9 Hz, 3H);  $^{13}\text{C NMR}$  (100 MHz,  $\text{CDCl}_3$ ):  $\delta$  163.6, 163.3 (d, C-F  $^1\text{JC-F}$  = 250.4 Hz), 154.5, 147.5, 132.0, 131.7, 131.6, 130.1 (d, C-F  $^3\text{JC-F}$  = 8.4 Hz), 128.5, 127.2, 125.7 (d, C-F  $^4\text{JC-F}$  = 3.3 Hz), 122.9, 122.1 (d, C-F  $^3\text{JC-F}$  = 8.5 Hz), 116.4, 115.4 (d, C-F  $^2\text{JC-F}$  = 21.9 Hz), 60.8, 13.7; mass (ES+)  $m/z$  = 542.17 (M+H) $^+$ ; HRMS (ESI-TOF) calcd for  $\text{C}_{25}\text{H}_{18}\text{Br}_2\text{FO}_3$  542.9601 Found 542.9615.

### Ethyl 2-(4-chlorophenyl)-4,5-diphenylfuran-3-carboxylate (3ha)

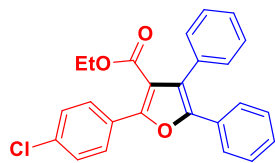

Eluent: Hexane/EA = 90:10,  $R_f$  = 0.51; Yield 59% (237 mg); light green oil. (KBr)  $\text{cm}^{-1}$ : 836, 1021, 1217, 1485, 1602, 1714, 2926  $\text{cm}^{-1}$ ;  $^1\text{H NMR}$  (400 MHz,  $\text{CDCl}_3$ ):  $\delta$  7.80 (d,  $J$  = 8.0 Hz, 2H), 7.44-7.34 (m, 7H), 7.36-7.34 (m, 2H), 7.24-7.23 (m, 3H), 4.05 (q,  $J$  = 6.8 Hz, 2H), 0.93 (t,  $J$  = 0.9 Hz, 3H);  $^{13}\text{C NMR}$  (100 MHz,  $\text{CDCl}_3$ ):  $\delta$  164.2, 153.2, 148.6, 135.0, 133.2, 129.9, 129.9, 129.0, 128.6, 128.5, 128.4, 127.9, 127.9, 125.9, 123.9, 117.4, 60.7, 13.6; mass (ES+)  $m/z$  = 403.07 (M+H) $^+$ ; HRMS (ESI-TOF) calcd for  $\text{C}_{25}\text{H}_{20}\text{ClO}_3$  403.1095 Found 403.1093.

### Ethyl 2-(4-chlorophenyl)-4,5-bis(4-methoxyphenyl)furan-3-carboxylate (3hc)

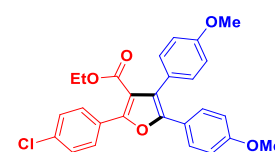

Eluent: Hexane/EA = 90:10,  $R_f$  = 0.23; Yield 68% (314 mg); light green oil; (KBr)  $\text{cm}^{-1}$ : 759, 835, 951, 1030, 1114, 1247, 1329, 1500, 1603, 1713, 2847  $\text{cm}^{-1}$ ;  $^1\text{H NMR}$  (400 MHz,  $\text{CDCl}_3$ ):  $\delta$  7.85 (d,  $J$  = 8.4 Hz, 2H), 7.40 (d,  $J$  = 8.7 Hz, 2H), 7.36 (d,  $J$  = 8.9 Hz, 2H), 7.25 (d,  $J$  = 8.6 Hz, 2H), 6.93 (d,  $J$  = 8.5 Hz, 2H), 6.78 (d,  $J$  = 8.8 Hz, 2H), 4.09 (q,  $J$  = 7.3 Hz, 2H), 3.86 (s, 3H), 3.77 (s, 3H), 0.95 (t,  $J$  = 0.9 Hz, 3H);  $^{13}\text{C NMR}$  (100 MHz,  $\text{CDCl}_3$ ):  $\delta$  164.3, 152.9, 148.7, 138.0, 137.9, 134.9, 133.0, 130.6, 129.9, 128.9, 128.7, 128.6, 128.5, 128.4, 128.3, 127.4, 126.4, 123.9, 123.0, 117.4, 60.7, 13.6; mass (ES+)  $m/z$  = 463.21 (M+H) $^+$ ; HRMS (ESI-TOF) calcd for  $\text{C}_{27}\text{H}_{24}\text{ClO}_5$  463.1307 Found 463.1308.

### Ethyl 2-(4-chlorophenyl)-4,5-bis(4-fluorophenyl)furan-3-carboxylate (3hd)

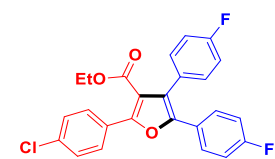

Eluent: Hexane/EA = 90:10,  $R_f$  = 0.61; Yield 53% (232 mg); light green oil; (KBr)  $\text{cm}^{-1}$ : 760, 836, 952, 1018, 1160, 1228, 1330, 1369, 1501, 1598, 1715, 2927  $\text{cm}^{-1}$ ;  $^1\text{H NMR}$  (400 MHz,  $\text{CDCl}_3$ ):  $\delta$  7.88-7.86 (m, 2H), 7.44-7.42 (m, 2H), 7.38-7.29 (m, 4H), 7.21 (t,  $J$  = 7.1 Hz, 2H), 6.95 (t,  $J$  = 6.9 Hz, 2H), 4.09 (q,  $J$  = 7.1 Hz, 2H), 1.00 (t,  $J$  = 0.9 Hz, 3H);  $^{13}\text{C NMR}$  (100 MHz,  $\text{CDCl}_3$ ):  $\delta$  163.8, 162.5 (d, C-F  $^1\text{JC-F}$  = 246.6 Hz), 162.3 (d, C-F  $^1\text{JC-F}$  = 248.5 Hz), 153.5, 148.0, 135.2, 131.7 (d, C-F  $^3\text{JC-F}$  = 8.1 Hz), 129.1, 128.9 (d, C-F  $^4\text{JC-F}$  = 3.6 Hz), 128.5, 128.4, 127.7 (d, C-F  $^3\text{JC-F}$  = 8.1 Hz), 126.0 (d, C-F  $^4\text{JC-F}$  = 3.3 Hz), 122.3, 117.0, 115.6 (d, C-F  $^2\text{JC-F}$  = 21.8 Hz), 115.5 (d, C-F  $^2\text{JC-F}$  = 21.6 Hz), 60.8, 13.7; mass (ES+)  $m/z$  = 439.19 (M+H) $^+$ ; HRMS (ESI-TOF) calcd for  $\text{C}_{25}\text{H}_{18}\text{ClF}_2\text{O}_3$  439.0907 Found 439.0901.

### Ethyl 2-(4-bromophenyl)-4,5-bis(4-methoxyphenyl)furan-3-carboxylate (3ic)

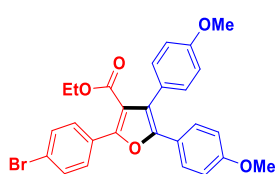

Eluent: Hexane/EA = 80:20,  $R_f$  = 0.46; Yield 58% (293 mg); light green oil; (KBr)  $\text{cm}^{-1}$ : 760, 835, 1031, 1217, 1411, 1507, 1604, 1714, 2926 759, 956, 1101, 1220, 1399, 1469, 1615, 2960, 3020, 3582  $\text{cm}^{-1}$ ;  $^1\text{H NMR}$  (400 MHz,  $\text{CDCl}_3$ ):  $\delta$  7.79 (d,  $J$  = 8.7 Hz, 2H), 7.56 (d,  $J$  = 8.7 Hz, 2H), 7.36 (d,  $J$  = 8.9 Hz, 2H), 7.26 (d,  $J$  = 8.6 Hz, 2H), 6.93 (d,  $J$  = 8.7 Hz, 2H), 6.79 (d,  $J$  = 8.9 Hz, 2H), 4.09 (q,  $J$  = 7.1 Hz, 2H), 3.86 (s, 3H), 3.77 (s, 3H), 1.00 (t,  $J$  = 0.9 Hz, 3H);  $^{13}\text{C NMR}$  (100 MHz,  $\text{CDCl}_3$ ):  $\delta$  164.4, 159.4, 159.2, 152.5, 148.9, 131.5, 131.3, 129.2, 128.9, 127.4, 125.4, 123.2, 122.9, 121.9, 117.5, 113.9, 113.9,



60.7, 55.3, 55.2, 13.8; mass (ES+)  $m/z = 507.20$  (M+H)<sup>+</sup>; HRMS(ESI-TOF) calcd for C<sub>27</sub>H<sub>24</sub>BrO<sub>5</sub> 507.0802 Found 507.0810.

### Ethyl 2-(3,4-dimethoxyphenyl)-4,5-diphenylfuran-3-carboxylate (3ja)

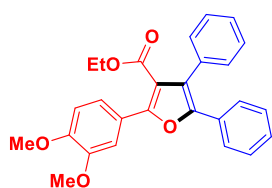

Eluent: Hexane/EA = 80:20, R<sub>f</sub> = 0.53; Yield 71% (303 mg); colourless oil; (KBr) cm<sup>-1</sup>: 758, 1026, 1172, 1227, 1326, 1461, 1507, 1602, 1712, 2927 cm<sup>-1</sup>; <sup>1</sup>H NMR (400 MHz, CDCl<sub>3</sub>): δ 7.60 (d, *J* = 8.0 Hz, 1H), 7.57 (dd, *J* = 2.1, 2.1 Hz, 1H), 7.43-7.34 (m, 8H), 7.24-7.20 (m, 3H), 6.95 (d, 8.4 Hz, 1H), 4.05 (q, *J* = 7.0 Hz, 2H), 3.97 (s, 3H), 3.94 (s, 3H), 0.91 (t, *J* = 0.9 Hz, 3H); <sup>13</sup>C NMR (100 MHz, CDCl<sub>3</sub>): δ 164.6, 154.6, 149.9, 148.7, 147.7, 133.6, 130.2, 129.9, 128.4, 127.7, 127.6, 125.8, 123.8, 122.8, 121.1, 116.1, 11.2, 110.9, 60.5, 55.9, 13.6; mass (ES+)  $m/z = 429.17$  (M+H)<sup>+</sup>; HRMS (ESI-TOF) calcd for C<sub>27</sub>H<sub>25</sub>O<sub>5</sub> 429.1702 Found 429.1737.

### Ethyl 2-(3,4-dimethoxyphenyl)-4,5-di-p-tolylfuran-3-carboxylate (3jb)

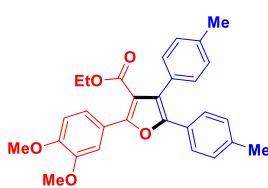

Eluent: Hexane/EA = 80:20, R<sub>f</sub> = 0.48; Yield 74% (337 mg); light green oil; (KBr) cm<sup>-1</sup>: 758, 817, 1025, 1148, 1219, 1265, 1460, 1511, 1716, 2927 cm<sup>-1</sup>; <sup>1</sup>H NMR (400 MHz, CDCl<sub>3</sub>): δ 7.55 (d, *J* = 1.9 Hz, 1H), 7.53 (dd, *J* = 2.1, 1.9 Hz, 1H), 7.32 (d, *J* = 8.2 Hz, 2H), 7.23-7.18 (m, 4H), 7.05 (d, *J* = 8.0 Hz, 2H), 6.94 (d, *J* = 8.5 Hz, 1H), 4.06 (q, *J* = 6.9 Hz, 2H), 3.96 (s, 3H), 3.94 (s, 3H), 2.40 (s, 3H), 2.29 (s, 3H), 0.91 (t, *J* = 0.9 Hz, 3H); <sup>13</sup>C NMR (100 MHz, CDCl<sub>3</sub>): δ 164.7, 154.0, 149.9, 148.7, 147.9, 137.5, 137.0, 130.5, 129.9, 127.6, 125.8, 123.0, 122.9, 120.9, 116.2, 111.1, 110.9, 60.5, 56.0, 55.9, 21.4, 21.3, 13.7; mass (ES+)  $m/z = 457.23$  (M+H)<sup>+</sup>; HRMS (ESI-TOF) calcd for C<sub>29</sub>H<sub>29</sub>O<sub>5</sub> 457.2020 Found 457.2031.

### Ethyl 2-(3,4-dimethoxyphenyl)-4,5-bis(4-methoxyphenyl)furan-3-carboxylate (3jc)

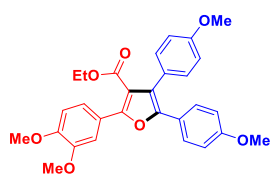

Eluent: Hexane/EA = 80:20, R<sub>f</sub> = 0.48; Yield 75% (366 mg); light green oil; (KBr) cm<sup>-1</sup>: 768, 848, 1050, 1175, 1230, 1475, 1560, 1765, 2930 cm<sup>-1</sup>; <sup>1</sup>H NMR (400 MHz, CDCl<sub>3</sub>): δ 7.54 (d, *J* = 1.9 Hz, 1H), 7.52 (dd, *J* = 2.0, 2.0 Hz, 1H), 7.36 (d, *J* = 9.1 Hz, 2H), 7.27-7.25 (m, 2H), 6.94 (dd, *J* = 2.4, 2.6 Hz, 3H), 6.79 (d, *J* = 9.1 Hz, 2H), 4.07 (q, *J* = 7.1 Hz, 2H), 3.96 (s, 3H), 3.94 (s, 3H), 3.86 (s, 3H), 3.78 (s, 3H), 1.00 (t, *J* = 0.9 Hz, 3H); <sup>13</sup>C NMR (100 MHz, CDCl<sub>3</sub>): δ 164.7, 155.5, 150.3, 148.7, 146.9, 132.4, 131.7, 128.8, 127.2, 123.0, 122.3, 121.9, 115.8, 111.4, 110.9, 60.7, 56.0, 55.9, 55.3, 55.3, 13.9; mass (ES+)  $m/z = 489.14$  (M+H)<sup>+</sup>; HRMS (ESI-TOF) calcd for C<sub>29</sub>H<sub>29</sub>O<sub>7</sub> 489.1908 Found 489.1906.

### Ethyl 2-(3,4-dimethoxyphenyl)-4,5-bis(4-fluorophenyl)furan-3-carboxylate (3jd)

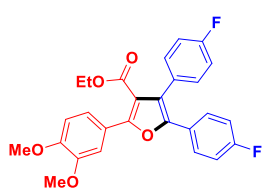

Eluent: Hexane/EA = 80:20, R<sub>f</sub> = 0.39; Yield 69% (320 mg); light green oil; (KBr) cm<sup>-1</sup>: 812, 1023, 1113, 1263, 1327, 1462, 1509, 1713, 2925, cm<sup>-1</sup>; <sup>1</sup>H NMR (400 MHz, CDCl<sub>3</sub>): δ 7.55 (d, *J* = 2.0 Hz, 1H), 7.53 (dd, *J* = 2.0, 2.0 Hz, 1H), 7.38-7.30 (m, 4H), 7.12 (t, *J* = 7.1 Hz, 2H), 6.97-6.93 (m, 3H), 4.05 (q, *J* = 7.1 Hz, 2H), 3.96 (s, 3H), 3.95 (s, 3H), 0.93 (t, *J* = 0.9 Hz, 3H); <sup>13</sup>C NMR (100 MHz, CDCl<sub>3</sub>): δ 164.1, 162.4 (d, C-F <sup>1</sup>J<sub>C-F</sub> = 246.0 Hz), 162.2 (d, C-F <sup>1</sup>J<sub>C-F</sub> = 248.6 Hz), 154.9, 150.1, 148.6, 147.1, 131.7 (d, C-F <sup>3</sup>J<sub>C-F</sub> = 8.0 Hz), 129.3 (d, C-F <sup>4</sup>J<sub>C-F</sub> = 3.8 Hz), 127.5 (d, C-F <sup>3</sup>J<sub>C-F</sub> = 8.0 Hz), 126.2 (d, C-F <sup>4</sup>J<sub>C-F</sub> = 3.0 Hz), 122.4, 122.2, 121.2, 115.8, 115.5 (d, C-F <sup>2</sup>J<sub>C-F</sub> = 21.7 Hz), 115.5 (d, C-F <sup>2</sup>J<sub>C-F</sub> = 21.4 Hz), 115.5, 115.5, 112.3, 110.9, 60.6, 56.1, 55.9, 13.7; mass (ES+)  $m/z = 465.06$  (M+H)<sup>+</sup>; HRMS (ESI-TOF) calcd for C<sub>27</sub>H<sub>23</sub>F<sub>2</sub>O<sub>5</sub> 465.1505 Found 465.1501.

### Ethyl 4,5-bis(4-bromophenyl)-2-(3,4-dimethoxyphenyl)furan-3-carboxylate (3jf)

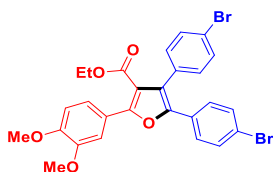

Eluent: Hexane/EA = 80:20, R<sub>f</sub> = 0.47; Yield 71% (413 mg); light green oil; (KBr) cm<sup>-1</sup>: 735, 827, 1011, 1113, 1227, 1460, 1507, 1713, 2957 cm<sup>-1</sup>; <sup>1</sup>H NMR (400 MHz, CDCl<sub>3</sub>): δ 7.56-7.51 (m, 4H), 7.39 (d, *J* = 8.8 Hz, 2H), 7.25-7.21 (m, 4H), 6.95 (d, *J* = 8.3 Hz, 1H), 4.06 (q, *J* = 7.1 Hz, 2H), 3.96 (s, 3H), 3.94 (s, 3H), 0.91 (t, *J* = 0.9 Hz, 3H); <sup>13</sup>C NMR (100 MHz, CDCl<sub>3</sub>): δ 163.9, 155.5, 150.3, 148.7, 146.9, 132.4,

131.7, 128.8, 127.3, 123.0, 122.3, 121.9, 115.8, 111.4, 110.9, 60.7, 56.0, 55.9, 13.9; mass (ES+)  $m/z = 584.19$  (M+H)<sup>+</sup>; HRMS (ESI-TOF) calcd for C<sub>27</sub>H<sub>23</sub>Br<sub>2</sub>O<sub>5</sub> 584.9907 Found 584.9932.

#### Ethyl 4,5-diphenyl-2-(3,4,5-trimethoxyphenyl)furan-3-carboxylate (3ka)

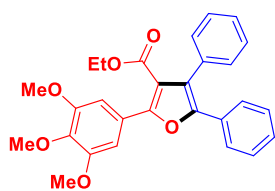

Eluent: Hexane/EA = 80:20, R<sub>f</sub> = 0.47; Yield 73% (334 mg); light yellow oil; (KBr) cm<sup>-1</sup>: 767, 948, 1003, 1178, 1234, 1335, 1415, 1501, 1677, 1717, 2930 cm<sup>-1</sup>; <sup>1</sup>H NMR (400 MHz, CDCl<sub>3</sub>): δ 7.43 -7.34 (m, 8H), 7.27-7.23 (4H), 4.07 (q, *J* = 7.1 Hz, 2H), 3.95 (s, 6H), 3.91 (s, 3H), 0.91 (t, *J* = 0.9 Hz, 3H); <sup>13</sup>C NMR (100 MHz, CDCl<sub>3</sub>): δ 164.5, 153.9, 153.0, 147.9, 139.3, 139.2, 133.4, 130.0, 129.9, 128.5, 127.7, 127.6, 125.8, 125.2, 123.8, 116.9, 114.0, 105.4, 60.9, 60.6, 56.3, 13.6; mass (ES+)  $m/z = 459.13$  (M+H)<sup>+</sup>; HRMS (ESI-TOF) calcd for C<sub>28</sub>H<sub>27</sub>O<sub>6</sub> 459.1802 Found 459.1807.

#### Ethyl 4,5-di-p-tolyl-2-(3,4,5-trimethoxyphenyl)furan-3-carboxylate (3kb)

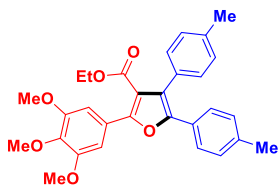

Eluent: Hexane/EA = 80:20, R<sub>f</sub> = 0.41; Yield 81% (393 mg); light yellow oil; (KBr) cm<sup>-1</sup>: 791, 827, 949, 1069, 1161, 1230, 1329, 1498, 1592, 1715, 2924 cm<sup>-1</sup>; <sup>1</sup>H NMR (400 MHz, CDCl<sub>3</sub>): δ 7.33 (d, *J* = 8.4 Hz, 2H), 7.25-18 (m, 6H), 7.05 (d, *J* = 8.1 Hz, 2H), 4.06 (q, *J* = 7.6 Hz, 2H), 3.97 (s, 6H), 3.91 (s, 3H), 2.40 (s, 3H), 2.30 (s, 3H), 0.91 (t, *J* = 0.9 Hz, 3H); <sup>13</sup>C NMR (100 MHz, CDCl<sub>3</sub>): δ 164.5, 153.9, 153.0, 147.9, 139.3, 139.2, 133.4, 130.0, 129.9, 128.5, 127.7, 127.6, 125.8, 125.2, 123.8, 116.9, 114.0, 105.4, 60.9, 60.6, 56.3, 13.6; mass (ES+)  $m/z = 487.21$  (M+H)<sup>+</sup>; HRMS (ESI-TOF) calcd for C<sub>28</sub>H<sub>27</sub>O<sub>6</sub> 487.2121 Found 487.2109.

#### Ethyl 4,5-bis(4-fluorophenyl)-2-(3,4,5-trimethoxyphenyl)furan-3-carboxylate (3kd)

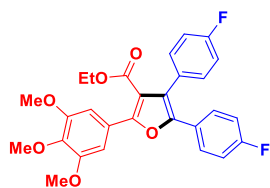

Eluent: Hexane/EA = 80:20, R<sub>f</sub> = 0.31; Yield 69% (340 mg); light yellow oil; (KBr) cm<sup>-1</sup>: 746, 838, 1001, 1126, 1214, 1461, 1585, 1711, 3020 cm<sup>-1</sup>; <sup>1</sup>H NMR (400 MHz, CDCl<sub>3</sub>): δ 7.38 -7.29 (m, 4H), 7.23 (s, 2H), 7.10 (t, *J* = 7.1 Hz, 2H), 6.95 (t, *J* = 6.9 Hz, 2H), 4.07 (q, *J* = 7.1 Hz, 2H), 3.94 (s, 6H), 3.91 (s, 3H), 0.98 (t, *J* = 0.9 Hz, 3H); <sup>13</sup>C NMR (100 MHz, CDCl<sub>3</sub>): δ 164.3, 162.6 (d, C-F <sup>1</sup>J<sub>C-F</sub> = 246.5 Hz), 162.4 (d, C-F <sup>1</sup>J<sub>C-F</sub> = 249.0 Hz), 154.5, 153.2, 147.5, 139.5, 131.8 (d, C-F <sup>3</sup>J<sub>C-F</sub> = 8.0 Hz), 129.2 (d, C-F <sup>4</sup>J<sub>C-F</sub> = 3.8 Hz), 127.8 (d, C-F <sup>3</sup>J<sub>C-F</sub> = 8.1 Hz), 126.2 (d, C-F <sup>4</sup>J<sub>C-F</sub> = 2.8 Hz), 125.1, 122.4, 116.8, 115.7 (d, C-F <sup>2</sup>J<sub>C-F</sub> = 21.8 Hz), 115.7 (d, C-F <sup>2</sup>J<sub>C-F</sub> = 21.6 Hz), 105.7, 61.1, 60.8, 56.4, 13.8; mass (ES+)  $m/z = 495.16$  (M+H)<sup>+</sup>; HRMS (ESI-TOF) calcd for C<sub>28</sub>H<sub>25</sub>F<sub>2</sub>O<sub>6</sub> 495.1619 Found 495.1621.

#### 1-(2-phenyl-4,5-di-m-tolylfuran-3-yl)propan-1-one (3ag)

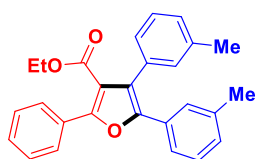

Eluent: Hexane/EA = 95:05, R<sub>f</sub> = 0.39; Yield 70% (277 mg); light yellow oil; (KBr) cm<sup>-1</sup>: 759, 832, 1033, 1118, 1217, 1331, 1461, 1605, 1710, 2926 cm<sup>-1</sup>; <sup>1</sup>H NMR (400 MHz, CDCl<sub>3</sub>): δ 7.93-7.91 (m, 2H), 7.47-7.43 (m, 2H), 7.41-7.39 (m, 1H), 7.33 (s, 1H), 7.30-7.26 (m, 1H), 7.18-7.14 (m, 3H), 7.10 (t, *J* = 7.1 Hz, 1H), 7.03 (d, *J* = 7.3 Hz, 1H), 4.07 (q, *J* = 6.1 Hz, 2H), 2.36 (s, 6H), 2.27 (s, 3H), 0.91 (t, *J* = 0.9 Hz, 3H); <sup>13</sup>C NMR (100 MHz, CDCl<sub>3</sub>): δ 164.5, 153.9, 148.4, 137.9, 137.9, 133.2, 130.6, 130.2, 129.9, 129.0, 128.5, 128.3, 127.8, 127.1, 126.4, 123.7, 122.9, 117.0, 60.6, 21.6, 21.4, 13.6; mass (ES+)  $m/z = 397.18$  (M+H)<sup>+</sup>; HRMS (ESI-TOF) calcd for C<sub>27</sub>H<sub>25</sub>O<sub>2</sub> 397.1804 Found 397.1807.

#### Ethyl 2-(4-fluorophenyl)-4,5-di-m-tolylfuran-3-carboxylate (3gg)

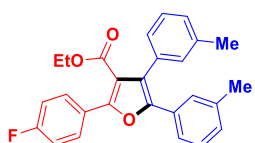

Eluent: Hexane/EA = 90:10, R<sub>f</sub> = 0.53; Yield 63% (260 mg); light yellow oil; (KBr) cm<sup>-1</sup>: 789, 840, 1031, 1114, 1234, 1330, 1500, 1604, 2925 cm<sup>-1</sup>; <sup>1</sup>H NMR (400 MHz, CDCl<sub>3</sub>): δ 7.96-7.92 (m, 2H), 7.31-7.25 (m, 2H), 7.19-7.08 (m, 7H), 7.03 (d, *J* = 7.1 Hz, 1H), 4.07 (q, *J* = 7.1 Hz, 2H), 2.36 (s, 3H), 2.27 (s, 3H), 0.91 (t, *J* = 0.9 Hz, 3H); <sup>13</sup>C NMR (100 MHz, CDCl<sub>3</sub>): δ 164.3, 163.3 (d, C-F <sup>1</sup>J<sub>C-F</sub> = 249.4 Hz), 153.4, 148.3, 137.9, 137.8, 133.1, 130.5, 129.9, 129.8 (d, C-F <sup>3</sup>J<sub>C-F</sub> = 8.5 Hz), 128.5, 128.3, 128.2, 127.0, 126.3, 126.2 (d, C-

$F^4JC-F = 3.5$  Hz), 123.7, 122.9, 116.7, 115.3 (d, C-F  $^2JC-F = 21.8$  Hz), 60.5, 21.4, 21.3, 13.5; mass (ES+)  $m/z = 415.19$  (M+H) $^+$ ; HRMS (ESI-TOF) calcd for  $C_{27}H_{24}FO_3$  415.1704 Found 415.1710.

### Ethyl 2-(4-chlorophenyl)-4,5-di-m-tolylfuran-3-carboxylate (3hg)

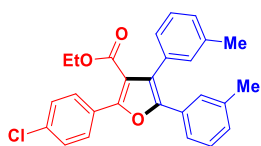

Eluent: Hexane/EA = 90:10,  $R_f = 0.41$ ; Yield 59% (253 mg); light green oil; (KBr)  $cm^{-1}$ : 759, 835, 1025, 1217, 1329, 1485, 1603, 1712, 2926  $cm^{-1}$ ;  $^1H$  NMR (400 MHz,  $CDCl_3$ ):  $\delta$  7.89 (d,  $J = 8.8$  Hz, 2H), 7.42 (d,  $J = 8.4$  Hz, 2H), 7.31-7.26 (m, 2H), 7.19-7.08 (m, 5H), 7.02 (d,  $J = 7.3$  Hz, 1H), 4.07 (q,  $J = 7.1$  Hz, 2H), 2.36 (s, 3H), 2.27 (s, 3H), 0.95 (t,  $J = 0.9$  Hz, 3H);  $^{13}C$  NMR (100 MHz,  $CDCl_3$ ):  $\delta$  164.3, 152.9, 148.7, 138.0, 137.9, 134.9, 133.0, 130.6, 129.9, 128.9, 128.7, 128.6, 128.5, 128.4, 128.3, 127.4, 126.4, 123.9, 123.0, 117.4, 60.7, 21.5, 21.4, 13.6; mass (ES+)  $m/z = 431.21$  (M+H) $^+$ ; HRMS (ESI-TOF) calcd for  $C_{27}H_{24}ClO_3$  431.1408 Found 431.1407.

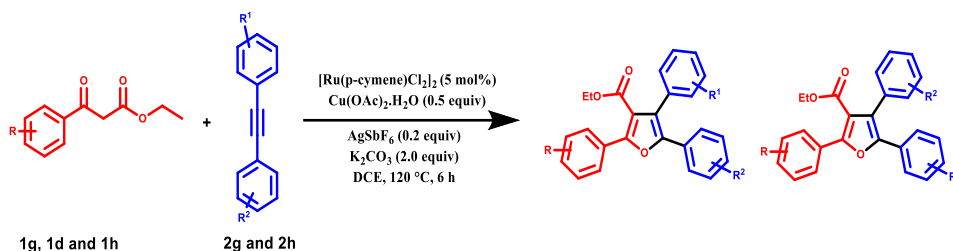

### Ethyl 2,5-bis(4-fluorophenyl)-4-(p-tolyl)furan-3-carboxylate (3gh)

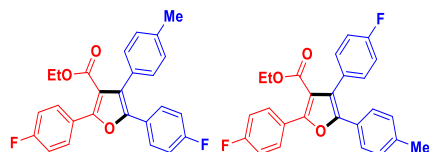

Eluent: Hexane/EA = 90:10,  $R_f = 0.54$ ; Yield 62% (65:35, 259 mg); light yellow oil; (KBr)  $cm^{-1}$ : 745, 835, 956, 1035, 1138, 1216, 1336, 1482, 1670, 1730, 2927, 3018,  $cm^{-1}$ ;  $^1H$  NMR (400 MHz,  $CDCl_3$ ):  $\delta$  7.95-7.89 (m, 2H), 7.41-7.38 (m, 1H), 7.16-7.05 (m, 4H), 6.96-6.91 (t,  $J = 8.5$  Hz, 1H), 4.09-4.04 (q,  $J = 7.1$  Hz, 2H), 2.41 (s, 2H), 3.91 (s, 3H), 0.98 (t,  $J = 0.9$  Hz, 3H);  $^{13}C$  NMR (100 MHz,  $CDCl_3$ ):  $\delta$  164.1, 164.0, 163.2 (d, C-F  $^1JC-F = 250.0$  Hz), 163.1 (d, C-F,  $^1JC-F = 250.0$  Hz), 162.4 (d, C-F  $^1JC-F = 247.3$  Hz), 162.2 (d, C-F  $^1JC-F = 247.3$  Hz), 153.7, 153.4, 148.8, 147.5, 138.0, 137.4, 131.8 (d, C-F  $^3JC-F = 8.1$  Hz), 130.0 (d, C-F  $^3JC-F = 8.1$  Hz), 129.9 (d, C-F  $^3JC-F = 8.1$  Hz), 129.7 (d, C-F  $^4JC-F = 3.4$  Hz), 129.2, 129.1, 128.9, 127.6 (d, C-F  $^3JC-F = 7.7$  Hz), 127.0, 126.3 (d, C-F  $^4JC-F = 3.4$  Hz), 126.1 (d, C-F  $^4JC-F = 3.4$  Hz), 125.7, 123.3, 121.8, 116.8, 116.4, 115.9, 115.4 (d, C-F  $^2JC-F = 21.8$  Hz), 115.3 (d, C-F  $^2JC-F = 21.8$  Hz), 115.3 (d, C-F  $^2JC-F = 21.8$  Hz), 60.6, 60.5, 21.3, 21.2, 13.6, 13.5; mass (ES+)  $m/z = 419.14$  (M+H) $^+$ ; HRMS (ESI-TOF) calcd for  $C_{26}H_{21}F_2O_3$  419.1459 Found 419.1448.

### Ethyl 4-(4-fluorophenyl)-5-(p-tolyl)-2-(3,4,5-trimethoxyphenyl)furan-3-carboxylate (3kh)

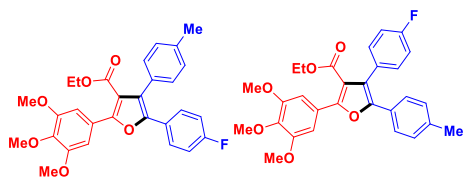

Eluent: Hexane/EA = 80:20,  $R_f = 0.37$ ; Yield 79% (60:40, 387 mg); light yellow oil; (KBr)  $cm^{-1}$ : 766, 838, 959, 1006, 1125, 1229, 1348, 1417, 1663, 1726, 2848, 2936,  $cm^{-1}$ ;  $^1H$  NMR (400 MHz,  $CDCl_3$ ): 7.45-7.41 (m, 1H), 7.36-7.32 (m, 1H), 7.32-7.30 (d,  $J = 8.3$  Hz), 7.28 (s, 0.3H), 7.27 (s, 1H), 7.24 (s, 1H), 7.24 (s, 2H), 7.14-7.09 (m, 2H), 6.99-6.95 (t,  $J = 8.5$  Hz, 1H), 4.08 (q,  $J = 7.1$  Hz, 2H), 3.96 (s, 6H), 3.94 (s, 3H), 2.44 (s, 2H), 2.34 (s, 1H), 0.97 (t,  $J = 0.9$  Hz, 3H);  $^{13}C$  NMR (100 MHz,  $CDCl_3$ ):  $\delta$  164.4, 164.3, 162.8 (d, C-F  $^1JC-F = 246.3$  Hz), 162.1 (d, C-F  $^1JC-F = 248.6$  Hz), 154.0, 153.7, 153.0, 153.0, 148.5, 147.1, 139.1, 137.9, 137.4, 131.7 (d, C-F  $^3JC-F = 8.4$  Hz), 129.9, 129.7, 129.4 (d, C-F  $^4JC-F = 3.6$  Hz), 129.2, 129.1, 127.6 (d,  $^3JC-F = 7.9$  Hz), 127.0, 126.4 (d, C-F  $^4JC-F = 3.3$  Hz), 125.8, 125.1, 123.4, 121.9, 116.9, 116.4, 115.4 (d, C-F  $^2JC-F = 21.8$  Hz), 105.4 (d, C-F  $^2JC-F = 21.3$  Hz), 105.3, 60.9, 60.6, 60.6, 56.2, 21.3, 21.2, 13.6, 13.6; mass (ES+)  $m/z = 491.18$  (M+H) $^+$ ; HRMS (ESI-TOF) calcd for  $C_{29}H_{28}F_2O_6$  491.1870 Found 491.1875.

### Ethyl 5-(4-chlorophenyl)-4-(4-methoxyphenyl)-2-(3,4,5-trimethoxyphenyl)furan-3-carboxylate (3ki)

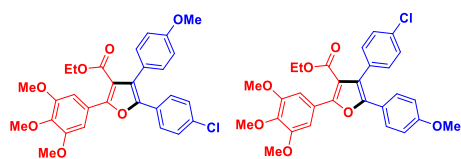

Eluent: Hexane/EA = 80:20,  $R_f$  = 0.47; Yield 73% (63:37, 381 mg); light yellow oil; (KBr)  $\text{cm}^{-1}$ : 747, 850, 962, 1062, 1129, 1214, 1333, 1465, 1664, 1728, 2925, 3020,  $\text{cm}^{-1}$ ;  $^1\text{H}$  NMR (400 MHz,  $\text{CDCl}_3$ ):  $\delta$  7.32-7.14 (m, 9H), 6.89-6.86 (d,  $J$  = 8.8 Hz, 1H), 6.75-6.73 (d,  $J$  = 8.8 Hz, 1H), 4.02-3.96 (q,  $J$  = 7.1 Hz, 2H), 3.86 (s, 6H), 3.84 (s, 3H), 3.79 (s, 2.2H), 3.71 (s, 1.1H), 0.92-0.88 (t,  $J$  = 7.0 Hz, 3H);  $^{13}\text{C}$  NMR (100 MHz,  $\text{CDCl}_3$ ):  $\delta$  164.4, 159.4, 159.3, 154.0, 153.0, 153.0, 148.4, 147.0, 139.2, 133.4, 132.1, 131.5, 130.9, 129.3, 129.1, 128.6, 127.4, 126.9, 125.1, 125.0, 125.0, 123.8, 122.4, 117.1, 114.0, 105.4, 105.3, 60.9, 60.6, 56.2, 56.2, 55.2, 13.7, 13.6; mass (ES+)  $m/z$  = 523.15 (M+H) $^+$ ; HRMS (ESI-TOF) calcd for  $\text{C}_{29}\text{H}_{28}\text{ClO}_7$  523.1524 Found 523.1526.

### ethyl 4-methyl-2,5-diphenylfuran-3-carboxylate (3aj)

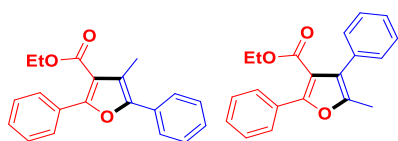

Eluent: Hexane/EA = 95:05,  $R_f$  = 0.63; Yield 47% (86:14, 143 mg); light yellow oil; (KBr)  $\text{cm}^{-1}$ : 759, 843, 949, 1088, 1175, 1227, 1332, 1446, 1598, 1721, 2960  $\text{cm}^{-1}$ ;  $^1\text{H}$  NMR (400 MHz,  $\text{CDCl}_3$ ):  $\delta$  7.82 (dd,  $J$  = 8.2 Hz,  $J$  = 1.6 Hz, 2H), 7.67 (d,  $J$  = 8.4 Hz, 2H), 7.46-7.36 (m, 5H), 7.35-7.31 (m, 1H), 4.32 (q,  $J$  = 7.1 Hz, 2H), 2.44 (s, 3H), 1.31 (t,  $J$  = 7.1 Hz, 2H);  $^{13}\text{C}$  NMR (100 MHz,  $\text{CDCl}_3$ ):  $\delta$  164.6, 156.0, 135.8, 130.7, 128.9, 128.5, 128.3, 128.0, 127.5, 126.6, 118.1, 116.3, 60.5, 14.1, 11.0; mass (ES+)  $m/z$  = 307.13 (M+H) $^+$ ; HRMS (ESI-TOF) calcd for  $\text{C}_{20}\text{H}_{19}\text{O}_3$  307.1334 Found 307.1334.

### ethyl 4-methyl-5-phenyl-2-(3,4,5-trimethoxyphenyl)furan-3-carboxylate (3kj)

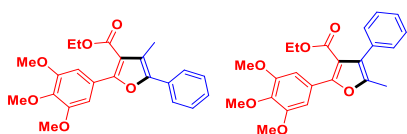

Eluent: Hexane/EA = 80:20,  $R_f$  = 0.56; Yield 54% (90:10, 213 mg); green oil; (KBr)  $\text{cm}^{-1}$ : 758, 845, 943, 1085, 1180, 1230, 1350, 1446, 1632, 1721, 2960  $\text{cm}^{-1}$ ;  $^1\text{H}$  NMR (400 MHz,  $\text{CDCl}_3$ ):  $\delta$  7.66 (d,  $J$  = 7.1 Hz, 2H), 7.46 (t,  $J$  = 7.5 Hz, 3H), 7.41-7.28 (m, 3H), 7.20 (s, 0.4H), 7.16 (s, 2H), 4.34 (q,  $J$  = 7.1 Hz, 2H), 3.92 (s, 6H), 3.91 (s, 3H), 1.35 (t,  $J$  = 7.1 Hz, 2H);  $^{13}\text{C}$  NMR (100 MHz,  $\text{CDCl}_3$ ):  $\delta$  165.4, 155.2, 153.8, 150.8, 149.7, 140.0, 130.4, 127.5, 127.1, 118.0, 114.6, 106.2, 60.9, 60.5, 56.2, 14.2, 11.1; mass (ES+)  $m/z$  = 397.16 (M+H) $^+$ ; HRMS (ESI-TOF) calcd for  $\text{C}_{20}\text{H}_{19}\text{O}_3$  397.1651 Found 397.1653.

### Ethyl 4,5-di(thiophen-3-yl)-2-(3,4,5-trimethoxyphenyl)furan-3-carboxylate (3kk)

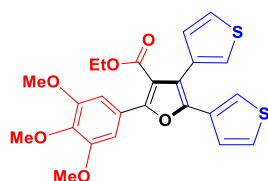

Eluent: Hexane/EA = 90:10,  $R_f$  = 0.51; Yield 56% (263 mg); light green oil; mp 182-185  $^{\circ}\text{C}$ ; (KBr)  $\text{cm}^{-1}$ : 734, 1054, 1125, 1262.3, 1416, 1462, 1501, 1732, 2853, 2923,  $\text{cm}^{-1}$ ;  $^1\text{H}$  NMR (400 MHz,  $\text{CDCl}_3$ ):  $\delta$  7.40-7.42 (dd,  $J$  = 3.0,  $J$  = 2.9 Hz, 1H), 7.30-7.31 (dd,  $J$  = 1.2 Hz,  $J$  = 1.3 Hz, 1H), 7.27-7.28 (dd,  $J$  = 1.2 Hz,  $J$  = 1.1 Hz, 1H), 7.23-7.24 (m, 3H), 7.10-7.11 (dd,  $J$  = 1.3 Hz,  $J$  = 1.1 Hz, 1H), 7.04-7.05 (dd,  $J$  = 1.2 Hz,  $J$  = 1.3 Hz, 1H), 4.07-4.12 (q,  $J$  = 7.1 Hz, 2H), 3.93 (s, 6H), 3.91 (s, 3H), 0.99-1.03 (t,  $J$  = 7.2 Hz, 3H);  $^{13}\text{C}$  NMR (100 MHz,  $\text{CDCl}_3$ ):  $\delta$  164.2, 153.7, 153.0, 146.2, 139.1, 132.6, 131.0, 130.2, 129.4, 125.7, 125.3, 125.2, 125.1, 124.3, 121.3, 117.4, 116.4, 105.4, 60.9, 60.6, 56.2, 13.6; mass (ES+)  $m/z$  = 471.09 (M+H) $^+$ ; HRMS (ESI-TOF) calcd for  $\text{C}_{24}\text{H}_{23}\text{O}_6\text{S}_2$  471.0936 Found 471.0929.

### ethyl 2-methyl-4,5-diphenylfuran-3-carboxylate (3la)

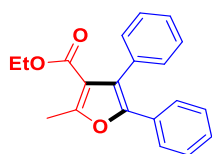

Eluent: Hexane/EA = 95:05,  $R_f$  = 0.62; Yield 58% (177 mg); light yellow solid; mp 130-135  $^{\circ}\text{C}$ ; (KBr)  $\text{cm}^{-1}$ : 759, 843, 949, 1088, 1175, 1227, 1332, 1446, 1598, 1721, 2960  $\text{cm}^{-1}$ ;  $^1\text{H}$  NMR (400 MHz,  $\text{CDCl}_3$ ):  $\delta$  7.27-7.19 (m, 7H), 7.08-7.04 (m, 2H), 3.98 (q,  $J$  = 7.1 Hz, 2H), 2.58 (s, 3H), 0.92 (t,  $J$  = 7.01 Hz, 3H);  $^{13}\text{C}$  NMR (100 MHz,  $\text{CDCl}_3$ ):  $\delta$  164.0, 158.2, 147.4, 133.8, 130.3, 130.2, 128.3, 128.1, 127.3, 125.4, 122.3, 115.7, 59.8, 14.2, 13.8; mass (ES+)  $m/z$  = 307.13 (M+H) $^+$ ; HRMS (ESI-TOF) calcd for  $\text{C}_{20}\text{H}_{19}\text{O}_3$  307.1334 Found 307.1332.

### methyl 2-(3-chlorophenyl)-4,5-diphenylfuran-3-carboxylate (3ma)

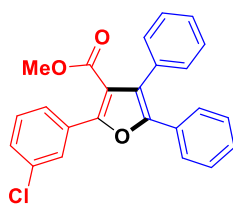

Yield 53% (205 mg); light yellow oil; (KBr)  $\text{cm}^{-1}$ : 696, 750, 832, 1015, 1119, 1259, 1334, 1487, 1602, 1720, 2851, 2922  $\text{cm}^{-1}$ ;  $^1\text{H}$  NMR (400 MHz,  $\text{CDCl}_3$ ):  $\delta$  7.85 (d,  $J = 8.7$  Hz, 2H), 7.44-7.38 (m, 7H), 7.36-7.34 (m, 2H), 7.25-7.23 (m, 3H), 3.58 (s, 3H);  $^{13}\text{C}$  NMR (100 MHz,  $\text{CDCl}_3$ ):  $\delta$  164.5, 135.1, 132.8, 129.9, 129.0, 128.6, 128.4, 128.3, 127.9, 127.7, 125.9, 57.5.

### 4,5-diphenyl-2-(3,4,5-trimethoxyphenyl)furan-3-carboxylic acid (4)

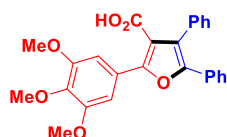

Potassium hydroxide (0.152 g, 2.71 mmol) was added to a stirred solution of the Ethyl 4,5-diphenyl-2-(3,4,5-trimethoxyphenyl)furan-3-carboxylate (**3ka**) (0.500 g, 1.08 mmol) in ethanol (10.0 mL) and water (5.0 mL) under  $\text{N}_2$ . The reaction was heated to reflux for 7 h and monitored via TLC. On completion, the reaction mixture was cooled to room temperature and then concentrated in vacuum. The remaining solid was dissolved in water, and the solution was acidified with 1N HCl until a precipitate formed. The solid was filtered and dried to afford 0.427 g (92%) of the desired product. 4,5-diphenyl-2-(3,4,5-trimethoxyphenyl)furan-3-carboxylic acid, yield 0.427 g (92%); Colourless oil; (KBr)  $\text{cm}^{-1}$ : 663, 748, 823, 998, 1024, 1216, 1354, 1650, 1721, 2129, 2257, 2995  $\text{cm}^{-1}$ ;  $^1\text{H}$  NMR (400 MHz,  $\text{DMSO-d}_6$ ):  $\delta$  7.47 – 7.27 (m, 10H), 7.24 (s, 1H), 3.84 (s, 6H), 3.74 (s, 3H);  $^{13}\text{C}$  NMR (100 MHz,  $\text{DMSO-d}_6$ ):  $\delta$  165.8, 160.5, 153.3, 147.7, 138.8, 137.0, 133.0, 130.1, 130.0, 129.0, 128.5, 128.2, 126.0, 125.2, 123.8, 105.2, 60.6, 56.4; mass (ES+)  $m/z = 431.14$  (M+H) $^+$ ; ESMS (ESI-TOF) calcd for  $\text{C}_{28}\text{H}_{27}\text{O}_6$  431.1 Found 431.4.

### N-benzyl-4,5-diphenyl-2-(3,4,5-trimethoxyphenyl)furan-3-carboxamide (5)

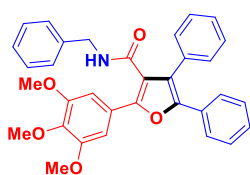

To a stirred solution of benzylamine (0.074 g, 0.691 mmol, 1.0 equiv.) in DCM (5 mL) was added 4,5-diphenyl-2-(3,4,5-trimethoxyphenyl)furan-3-carboxylic acid (**4**) (0.200 g, 0.581 mmol, 1.0 equiv.), EDC (0.111 g, 0.581 mmol, 1.0 eq), HOBt (0.078 g, 0.577 mmol, 1 equiv.) and 4-DMAP (0.035 g, 0.286 mmol, 0.4 equiv.) at rt for 8 h. The reaction was monitored via TLC (eluent phase = Hexane/EA = 70:30,  $R_f = 0.41$ ). After completion of the reaction, its solvent was evaporated by rotary and concentrated under reduced pressure. Then, the reaction mixture was diluted with EtOAc, quenched with saturated  $\text{NaHCO}_3$  solution, extracted with EtOAc (2x100 mL). The combined organic extracts were dried over anhydrous  $\text{Na}_2\text{SO}_4$ , filtered, and concentrated under reduced pressure. The crude compound was purified by column chromatography over silica gel (20% EA/hexanes) to afford the desired product, Yield 0.274 g (91%); light green oil; (KBr)  $\text{cm}^{-1}$ : 696.6, 742.8, 872.1, 999.3, 1027.6, 1124.0, 1214.7, 1383.6, 1449.4, 1558.0, 1645.3, 2929.2  $\text{cm}^{-1}$ ;  $^1\text{H}$  NMR (400 MHz,  $\text{CDCl}_3$ ):  $\delta$  7.44 (dd,  $J = 1.8$  Hz,  $J = 8.2$  Hz, 2H), 7.39 (s, 5H), 7.34-7.24 (m, 5H), 7.19-7.16 (m, 3H), 6.90-6.88 (m, 2H), 5.6 (t,  $J = 5.2$  Hz, N-H), 4.36 (d,  $J = 5.6$  Hz, 2H), 3.9 (s, 3H), 3.8 (s, 6H);  $^{13}\text{C}$  NMR (100 MHz,  $\text{CDCl}_3$ ):  $\delta$  164.3, 153.3, 147.7, 138.7, 137.4, 132.3, 130.0, 129.8, 129.1, 128.5, 128.4, 128.2, 127.8, 127.5, 127.3, 125.9, 125.2, 122.5, 120.2, 104.1, 60.9, 56.2, 43.8; mass (ES+)  $m/z = 520.2$  (M+H) $^+$ ; ESMS (ESI-TOF) calcd for  $\text{C}_{28}\text{H}_{27}\text{O}_6$  520.2 Found 521.5.

### (4,5-diphenyl-2-(3,4,5-trimethoxyphenyl)furan-3-yl)methanol (6)

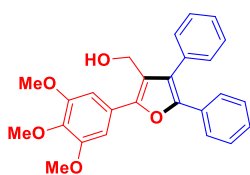

To a solution of Ethyl 4,5-diphenyl-2-(3,4,5-trimethoxyphenyl)furan-3-carboxylate (**3ka**) (0.250 g, .543 mmol) in  $\text{Et}_2\text{O}$  (8 mL),  $\text{LiAlH}_4$  (0.042 g, 1.08 mmol) was added in portions wise at 0 °C. After that reaction mixture was stirred at rt for 1h, followed by quenching with  $\text{H}_2\text{O}$  (0.3 mL), NaOH 1 M (0.2 mL) and  $\text{H}_2\text{O}$  (6 mL) at 0 °C. The resulting white precipitate was filtered off and the solvent was removed under reduced pressure affording compound **6** (0.212 g, 94%) as a colourless oil.  $R_f = 0.2$  (eluent phase = Hexane/EA = 60:40,  $R_f = 0.28$ ) Yield 0.212 g (94%); (KBr)  $\text{cm}^{-1}$ : 646.6, 755.5, 895.6, 1067.6, 1168.0, 1210.7, 1370.2, 1410.1, 1532.4, 1655.3, 1785.2, 2905.8, 3352  $\text{cm}^{-1}$ ;  $^1\text{H}$  NMR (400 MHz,  $\text{DMSO-d}_6$ ):  $\delta$  7.51-7.41 (m, 7H), 7.31 (t,  $J = 7.1$  Hz, 2H), 7.27 (s, 2H), 7.26-7.22 (m, 1H), 5.1 (t,  $J = 4.1$  Hz, 1H), 4.26 (d,  $J = 3.9$  Hz),

3.88 (s, 6H), 3.74 (s, 3H);  $^{13}\text{C}$  NMR (100 MHz,  $\text{CDCl}_3$ ):  $\delta$  153.7, 150.8, 146.8, 138.1, 133.0, 130.7, 130.4, 129.3, 129.0, 128.2, 127.9, 126.0, 125.7, 122.9, 104.0, 60.6, 56.4, 53.6.

#### 4,5-diphenyl-2-(3,4,5-trimethoxyphenyl)furan-3-carbaldehyde (7)

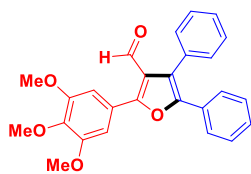

In a round bottom flask equipped with a condenser the 4,5-diphenyl-2-(3,4,5-trimethoxyphenyl)furan-3-yl)methanol was dissolved in the toluene (8 ml) and  $\text{MnO}_2$  was added. The mixture vigorously stirred under reflux for 12 h until most of the starting material was consumed monitored *via* TLC (eluent phase = Hexane/EA = 80:20,  $R_f$  = 0.41). After cooling to room temperature, the suspension is filtered over celite with a glass frit. The crude compound was purified by column chromatography over silica gel (10% EA/hexanes) to afford the desired product Yield 92% (0.228 g); yellow oil; (KBr)  $\text{cm}^{-1}$ : 642.3, 720.8, 852.7, 965.2, 1024.2, 1253.8, 1358.7, 1485.2, 1507.5, 1640.5, 1725.6, 2980.7,  $\text{cm}^{-1}$ ;  $^1\text{H}$  NMR (400 MHz,  $\text{CDCl}_3$ ):  $\delta$  9.83 (s, 1H), 7.49 (s, 2H), 7.48-7.40 (m, 7H), 7.29-7.26 (m, 3H), 3.99 (s, 6H), 3.94 (s, 3H);  $^{13}\text{C}$  NMR (100 MHz,  $\text{CDCl}_3$ ):  $\delta$  186.4, 157.6, 153.3, 148.2, 140.1, 131.4, 130.3, 129.6, 128.9, 128.5, 128.3, 128.1, 125.5, 124.2, 124.0, 122.2, 105.5, 61.0, 56.4 mass (ES+)  $m/z$  = 415.1 (M+H) $^+$ ; ESMS (ESI-TOF) calcd for  $\text{C}_{28}\text{H}_{27}\text{O}_6$  415.1 Found 415.4.

## 7. Copies of NMR Spectra

<sup>1</sup>H NMR spectrum of compound- 2b (400 MHz, CDCl<sub>3</sub>)

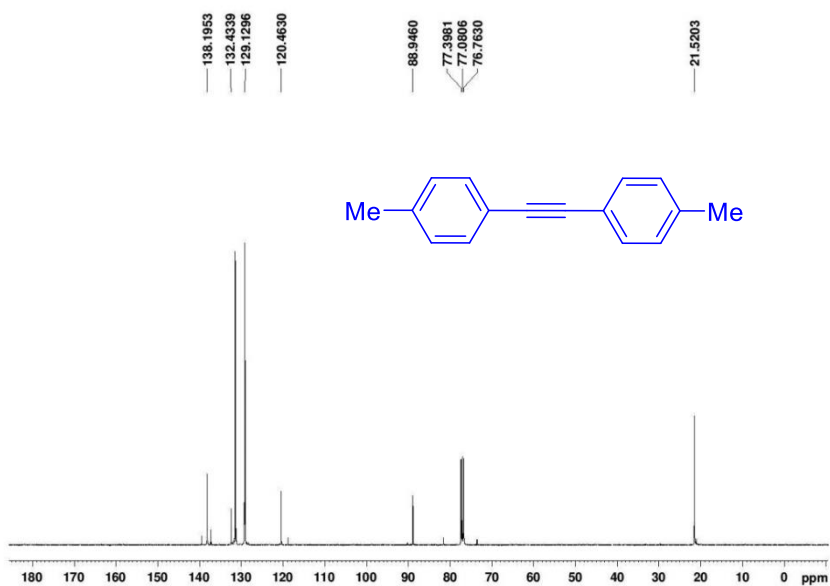

```

=====
Current Data Parameters
NAME: 2b
PROCNO: 1
F2 - Acquisition Parameters
Date_: 202308
Time: 10.50
INSTRUM: spect
PROBHD: 5 mm QNP 1H
PULPROG: zgpg30
AQ: 6.0000000
SOLVENT: CDCl3
NS: 1631
DS: 4
SWH: 12000.000 Hz
FIDRES: 0.001111 Hz
AQRES: 0.001111 Hz
RG: 1024
AQ: 1.0000000 sec
DE: 6.20 uV
TE: 300.2 K
=====
===== CHANNEL f1 =====
NUC1: 13C
P1: 0.12000000 sec
PLW1: 0.08000000 W
===== CHANNEL f2 =====
NUC2: 1H
P2: 0.00000000 sec
PLW2: 0.00000000 W
=====
P2 - Processing parameters
SI: 32768
SF: 125.7611800 MHz
RG: 655
LB: 0.00000000 Hz
GB: 0
LB2: 1.00 Hz
GB2: 0
PC: 1.50

```

<sup>13</sup>C NMR spectrum of compound- 2b (100 MHz, CDCl<sub>3</sub>)

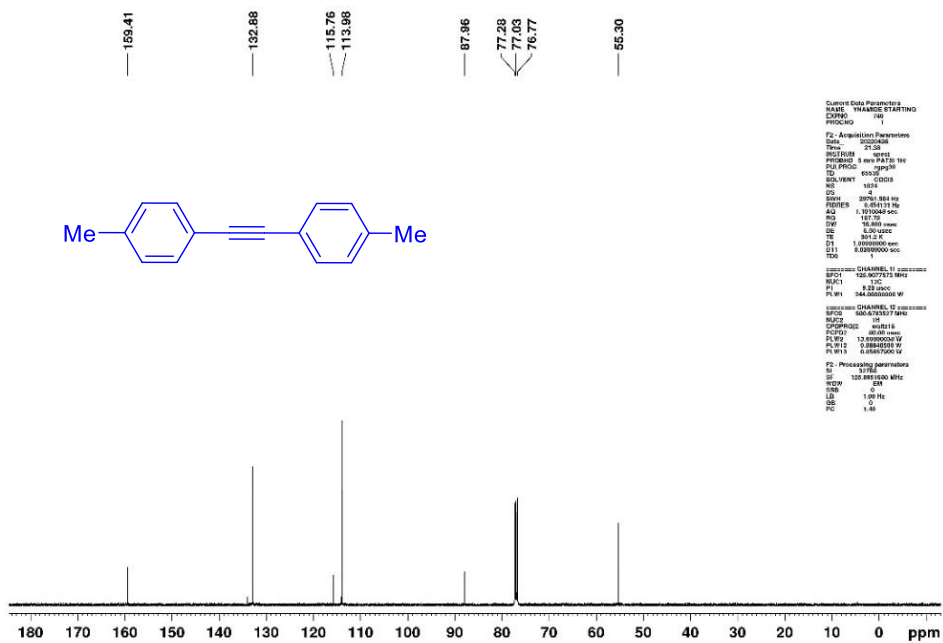

```

=====
Current Data Parameters
NAME: 2b
PROCNO: 1
F2 - Acquisition Parameters
Date_: 202308
Time: 10.50
INSTRUM: spect
PROBHD: 5 mm QNP 1H
PULPROG: zgpg30
AQ: 6.0000000
SOLVENT: CDCl3
NS: 1631
DS: 4
SWH: 12000.000 Hz
FIDRES: 0.001111 Hz
AQRES: 0.001111 Hz
RG: 1024
AQ: 1.0000000 sec
DE: 6.20 uV
TE: 300.2 K
=====
===== CHANNEL f1 =====
NUC1: 13C
P1: 0.12000000 sec
PLW1: 0.08000000 W
===== CHANNEL f2 =====
NUC2: 1H
P2: 0.00000000 sec
PLW2: 0.00000000 W
=====
P2 - Processing parameters
SI: 32768
SF: 125.7611800 MHz
RG: 655
LB: 0
LB2: 1.00 Hz
GB: 0
PC: 1.50

```

<sup>1</sup>H NMR spectrum of compound- 2c (400 MHz, CDCl<sub>3</sub>)

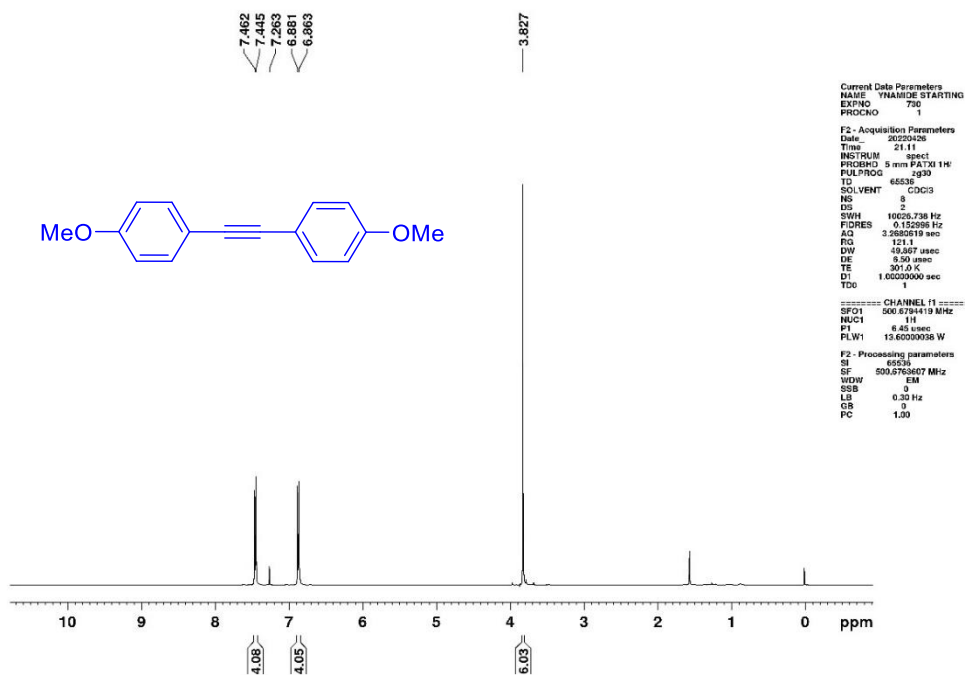

<sup>13</sup>C NMR spectrum of compound- 2c (100 MHz, CDCl<sub>3</sub>)

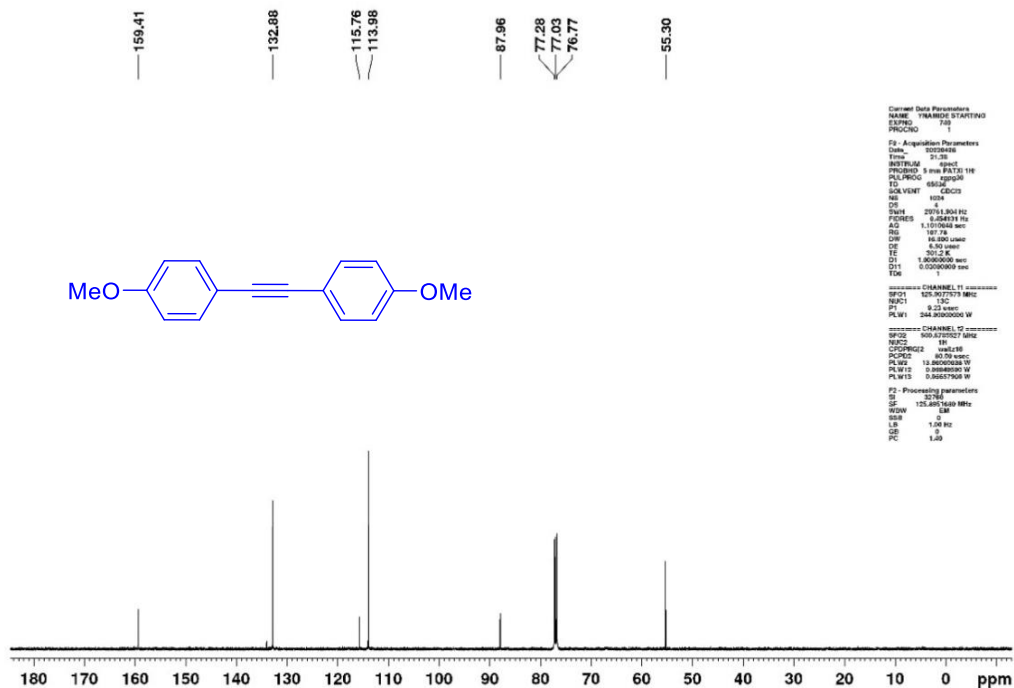



<sup>1</sup>H NMR spectrum of compound- 2d (400 MHz, CDCl<sub>3</sub>)

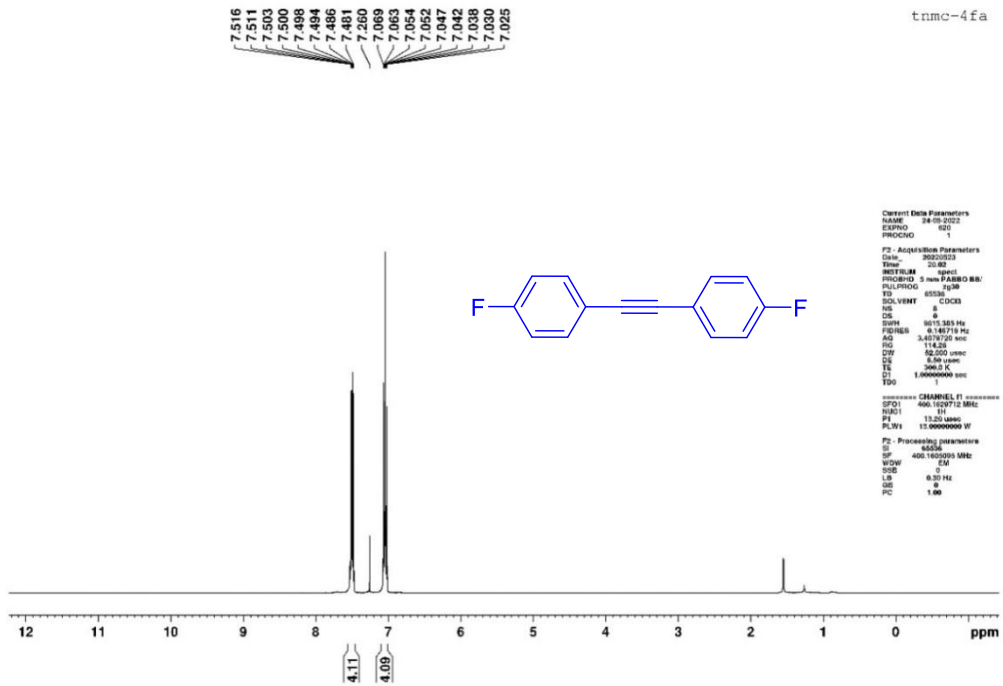

<sup>13</sup>C NMR spectrum of compound- 2d (100 MHz, CDCl<sub>3</sub>)

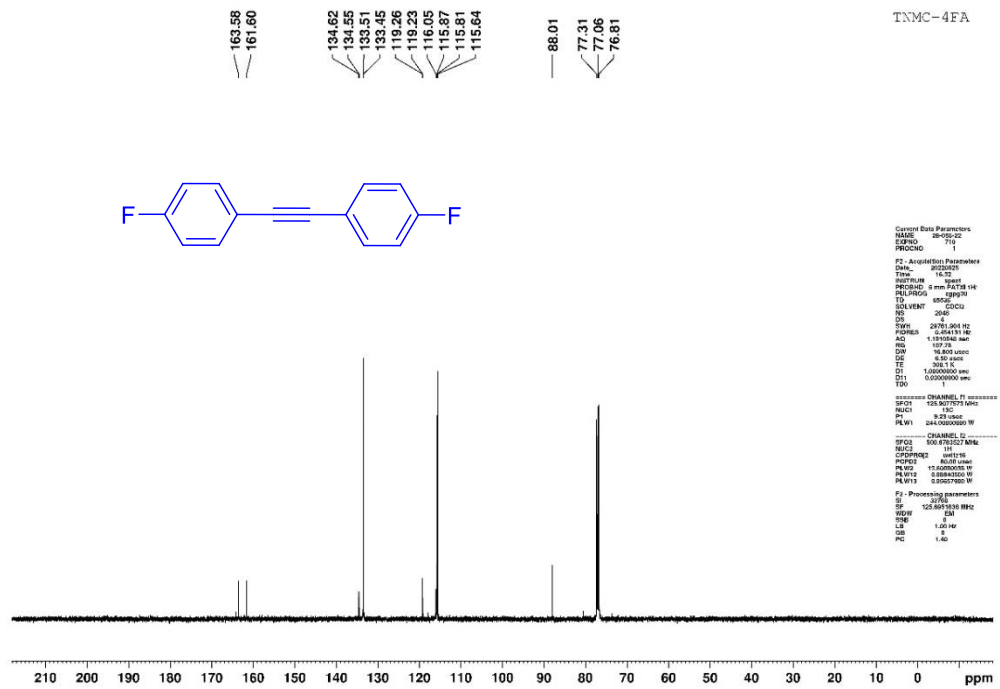

<sup>1</sup>H NMR spectrum of compound- 2e (400 MHz, CDCl<sub>3</sub>)

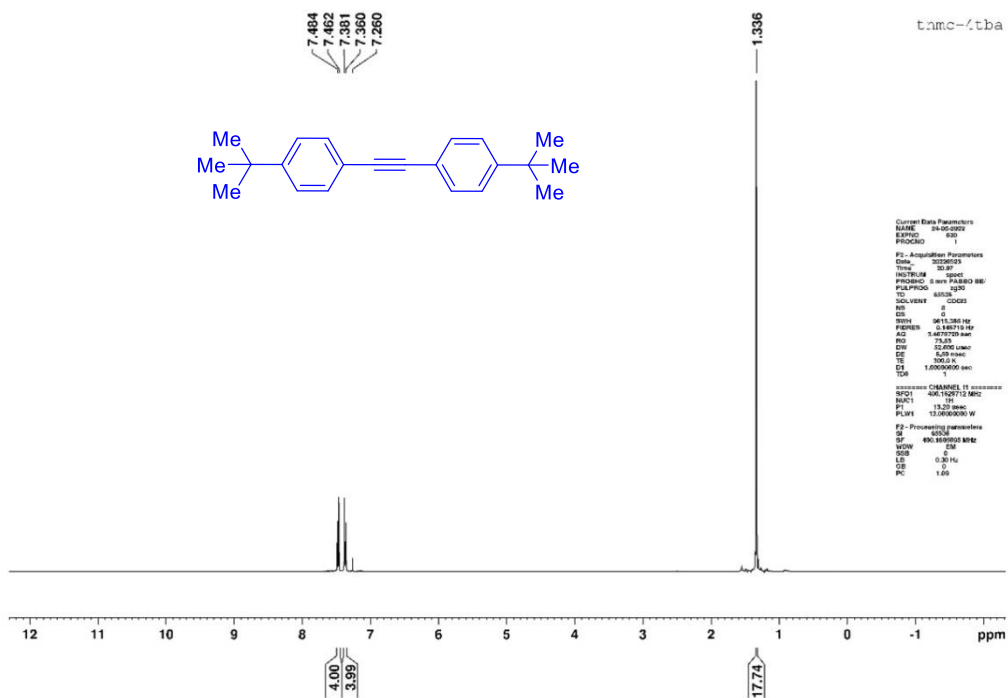

<sup>13</sup>C NMR spectrum of compound- 2e (100 MHz, CDCl<sub>3</sub>)

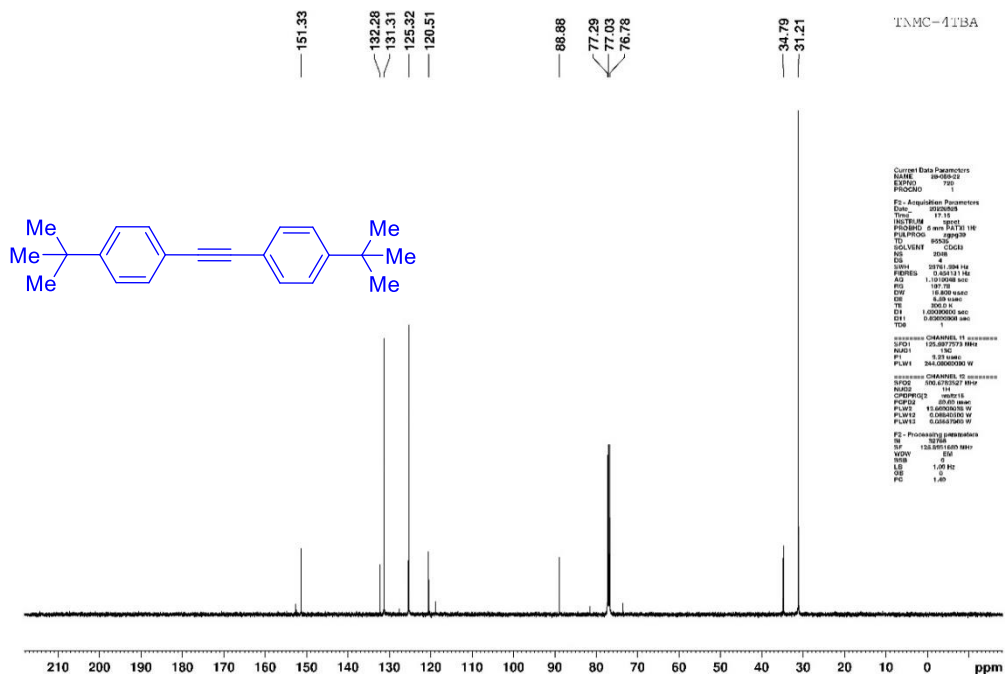

**<sup>1</sup>H NMR spectrum of compound- 2f (400 MHz, CDCl<sub>3</sub>)**

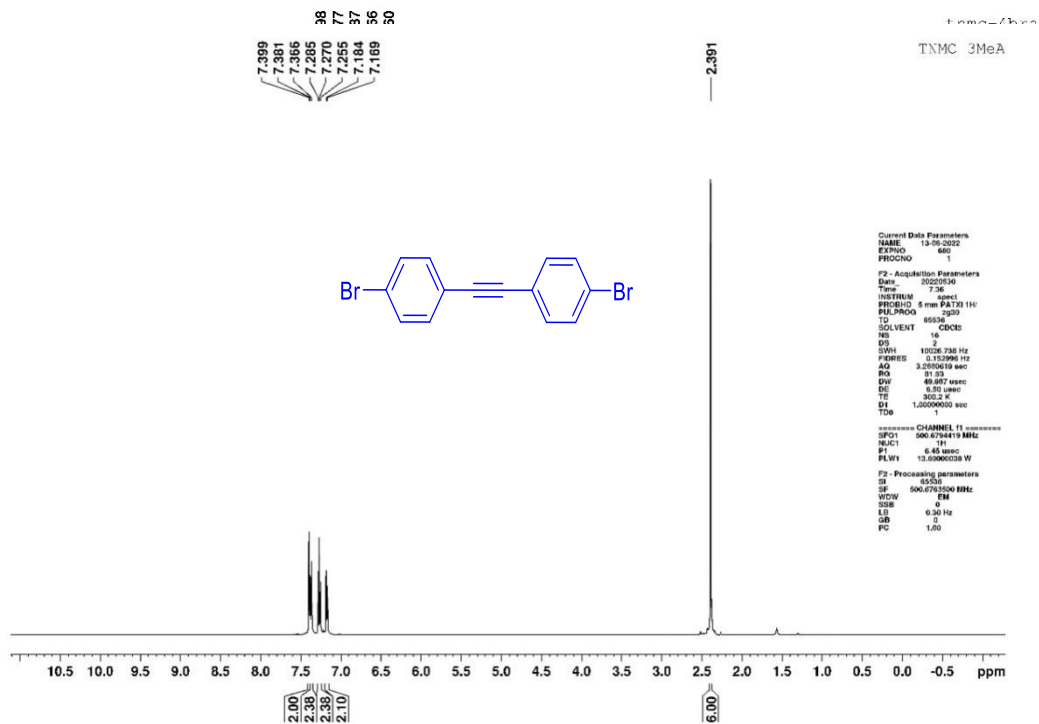

**<sup>13</sup>C NMR spectrum of compound- 2f (100 MHz, CDCl<sub>3</sub>)**

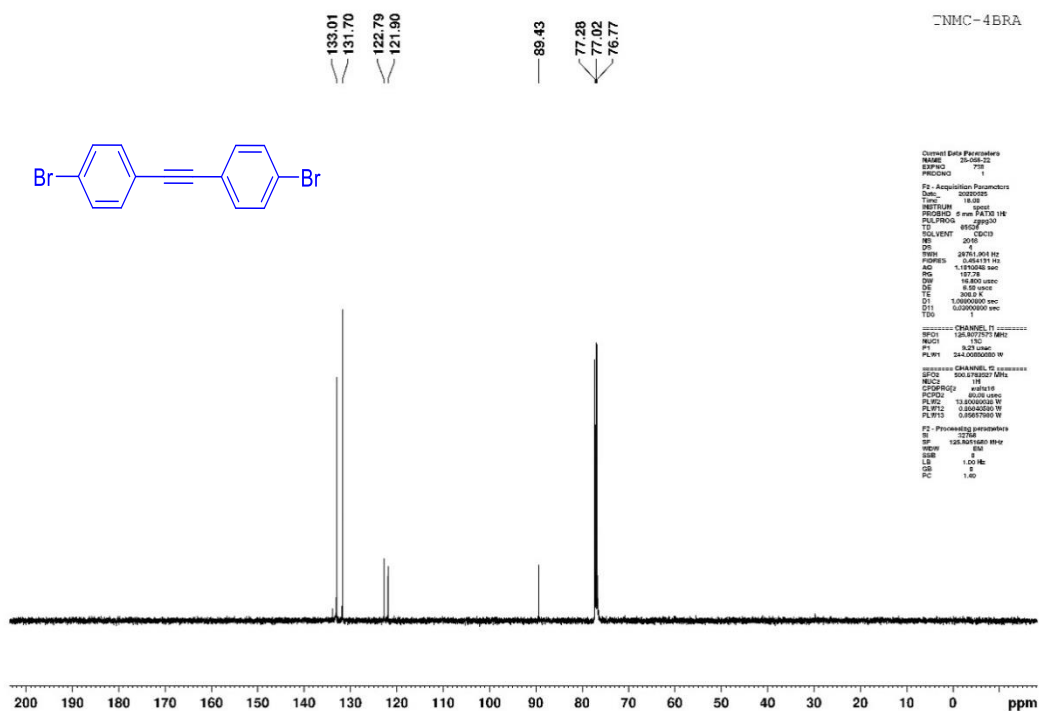

<sup>1</sup>H NMR spectrum of compound- 2i (400 MHz, CDCl<sub>3</sub>)

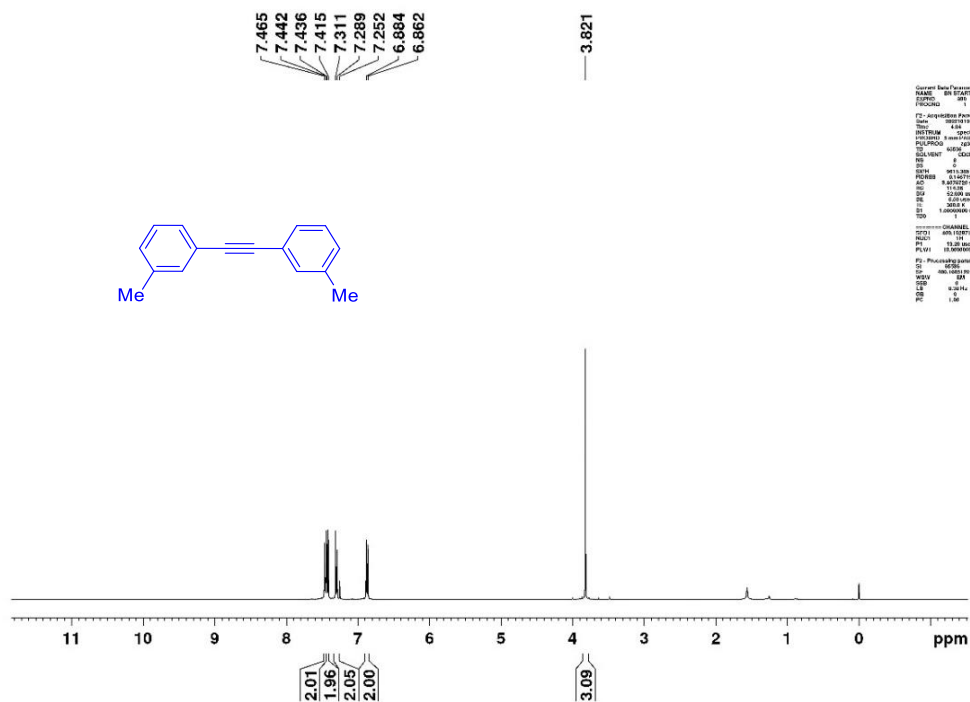

```

General Parameters
NAME: 4i-20210629
EXPNO: 1
PROCNO: 1
F2-Processing Parameters
Date_ 20210629
Time 14.51
INSTRUM: spect
PROBHD: zgpg30
PULPROG: zgpg30
SOLVENT: ccdcl3
NS: 2048
DS: 4
SWH: 400.138 MHz
FIDRES: 0.132779 Hz
AQ: 0.453250 sec
RG: 655.36
DE: 3.250000 mm
TE: 300.2 K
D1: 0.050000 sec
DELTA: 1.000000 sec
TD: 65536
===== CHANNEL f1 =====
NUC1: 13C
P1: 12.000000 sec
PL1: 0.000000 dB
===== CHANNEL f2 =====
NUC2: 1H
P2: 4.000000 sec
PL2: 0.000000 dB
===== CHANNEL f3 =====
NUC3: 1H
P3: 1.500000 sec
PL3: 0.000000 dB
===== CHANNEL f4 =====
NUC4: 1H
P4: 1.500000 sec
PL4: 0.000000 dB
===== CHANNEL f5 =====
NUC5: 1H
P5: 1.500000 sec
PL5: 0.000000 dB

```

<sup>13</sup>C NMR spectrum of compound- 2g (100 MHz, CDCl<sub>3</sub>)

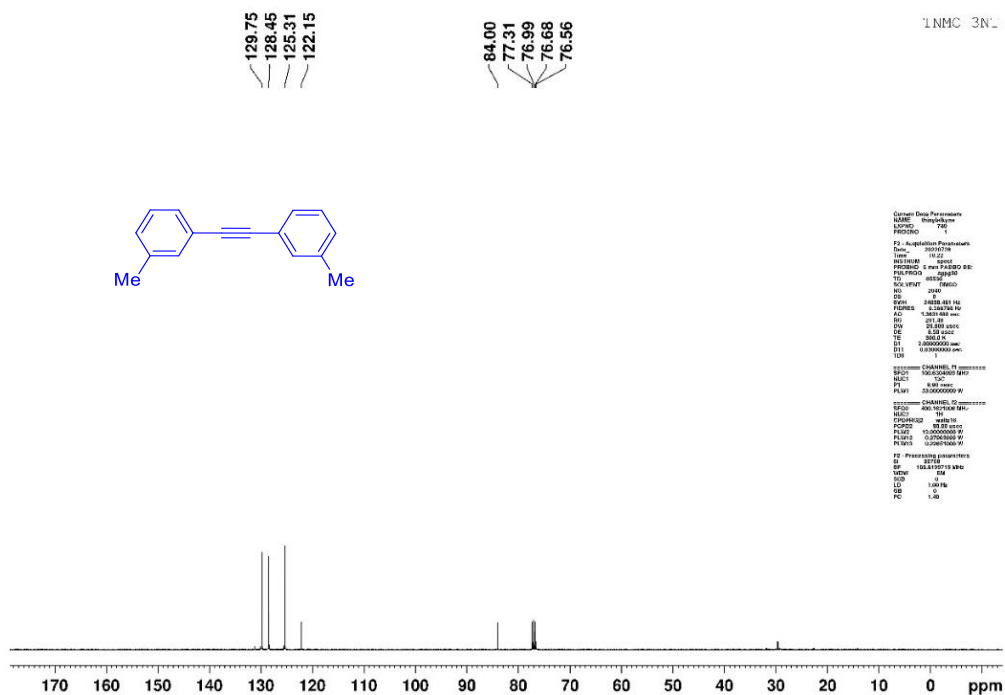

```

General Parameters
NAME: 4i-20210629
EXPNO: 1
PROCNO: 1
F2-Processing Parameters
Date_ 20210629
Time 14.51
INSTRUM: spect
PROBHD: zgpg30
PULPROG: zgpg30
SOLVENT: ccdcl3
NS: 2048
DS: 4
SWH: 100.626 MHz
FIDRES: 0.132779 Hz
AQ: 0.453250 sec
RG: 655.36
DE: 3.250000 mm
TE: 300.2 K
D1: 0.050000 sec
DELTA: 1.000000 sec
TD: 65536
===== CHANNEL f1 =====
NUC1: 13C
P1: 12.000000 sec
PL1: 0.000000 dB
===== CHANNEL f2 =====
NUC2: 1H
P2: 4.000000 sec
PL2: 0.000000 dB
===== CHANNEL f3 =====
NUC3: 1H
P3: 1.500000 sec
PL3: 0.000000 dB
===== CHANNEL f4 =====
NUC4: 1H
P4: 1.500000 sec
PL4: 0.000000 dB
===== CHANNEL f5 =====
NUC5: 1H
P5: 1.500000 sec
PL5: 0.000000 dB

```

<sup>13</sup>C NMR spectrum of compound- 2i (100 MHz, CDCl<sub>3</sub>)

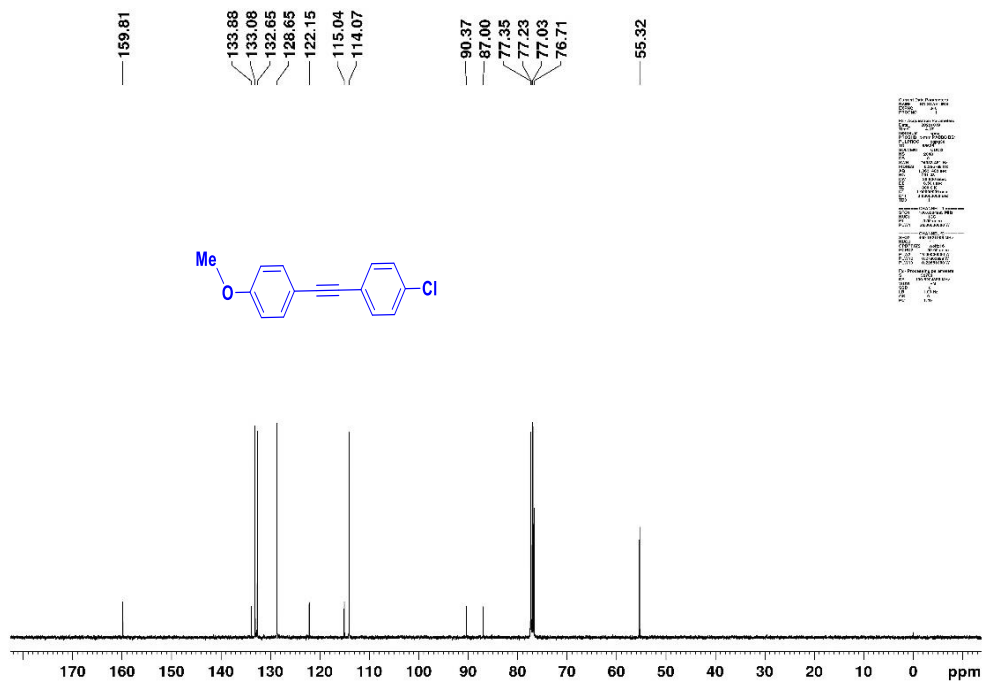

<sup>1</sup>H NMR spectrum of compound- 2j (400 MHz, CDCl<sub>3</sub>)

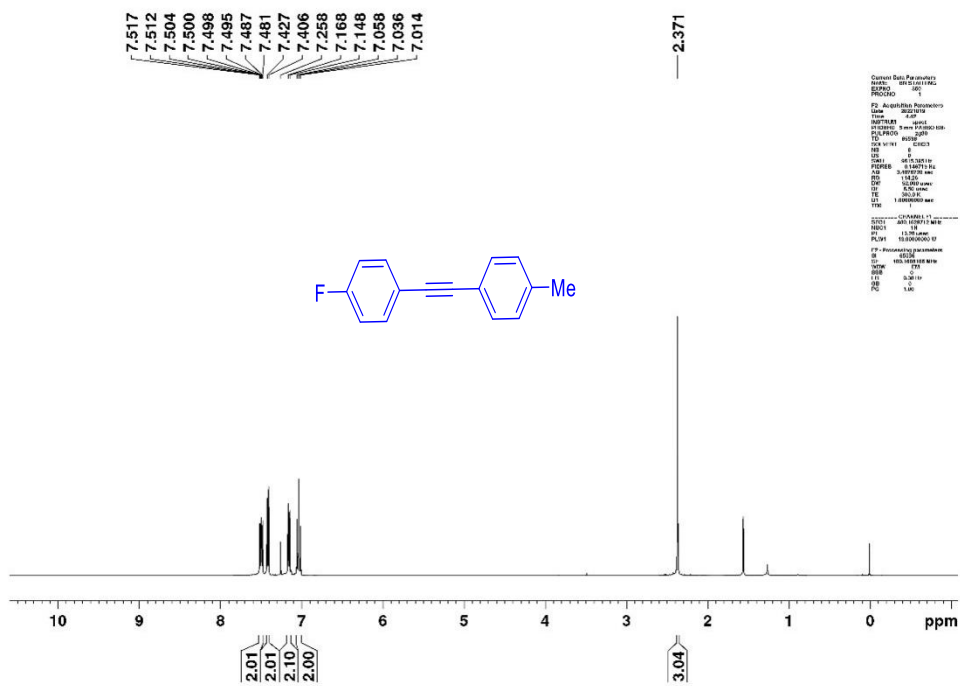

<sup>13</sup>C NMR Spectrum of compound- 2j (100 MHz, CDCl<sub>3</sub>)

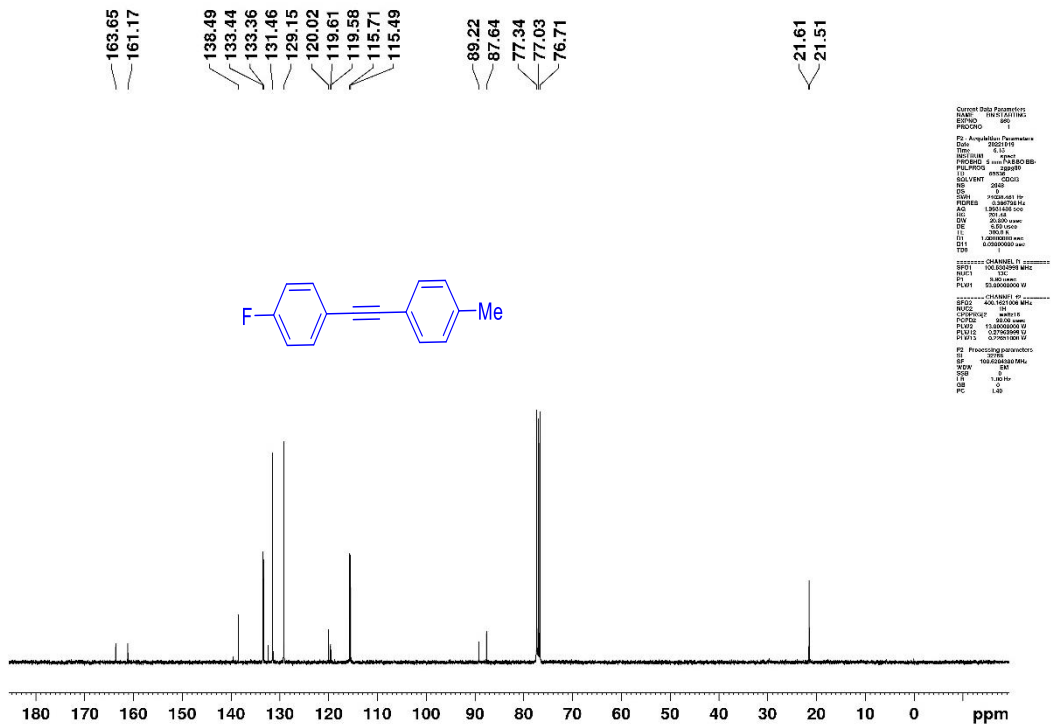

<sup>1</sup>H NMR Spectrum of compound- 3aa (400 MHz, CDCl<sub>3</sub>); X= wax impurity

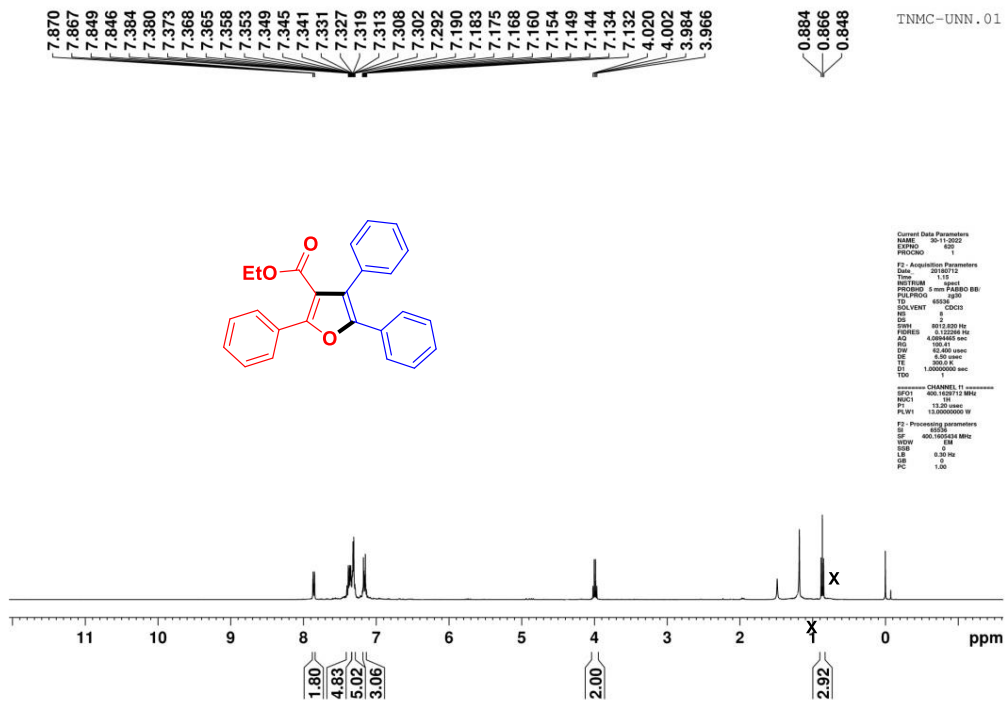

<sup>13</sup>C NMR Spectrum of compound- 3aa (100 MHz, CDCl<sub>3</sub>); X= wax impurity

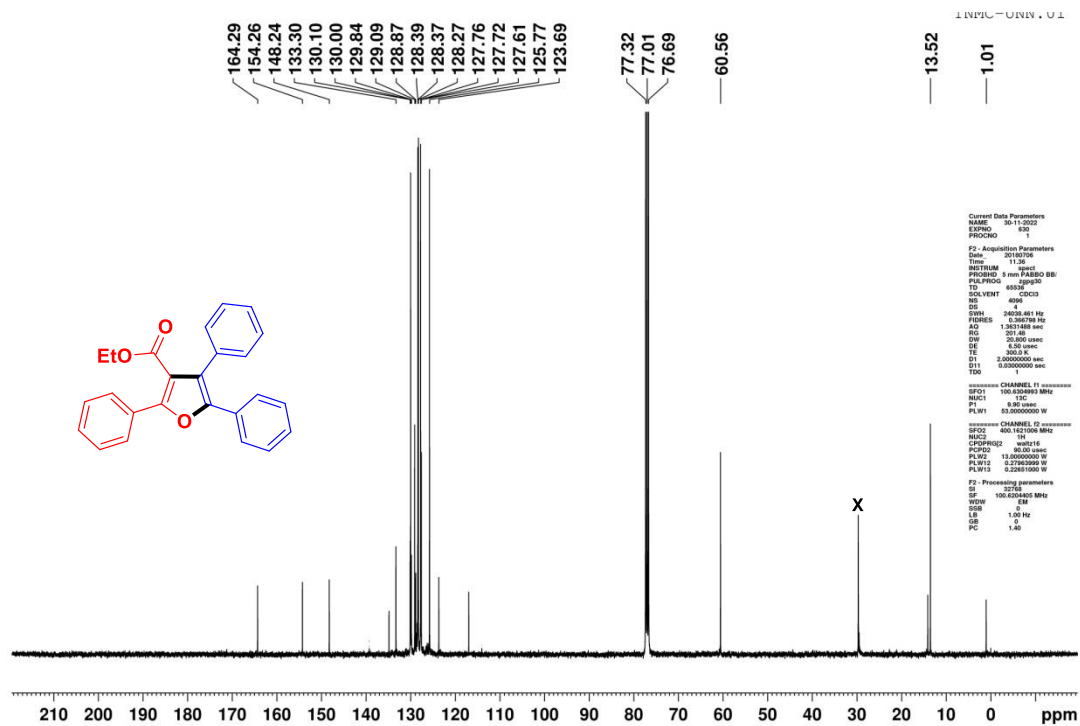

HRMS spectrum of compound-3aa

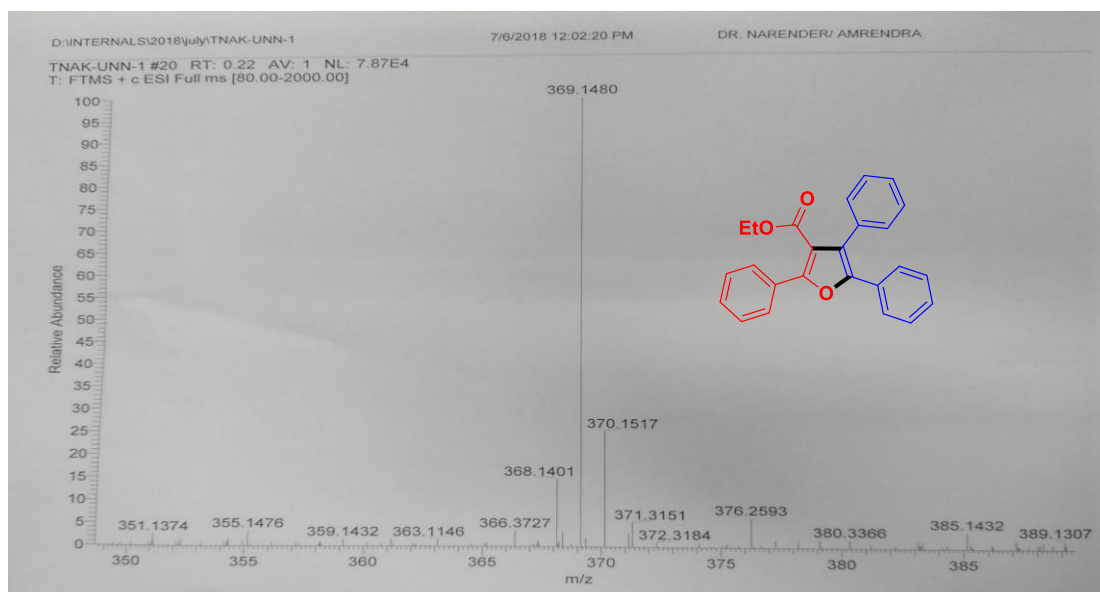

<sup>1</sup>H NMR Spectrum of compound- 3ac (400 MHz, CDCl<sub>3</sub>); X= wax impurity

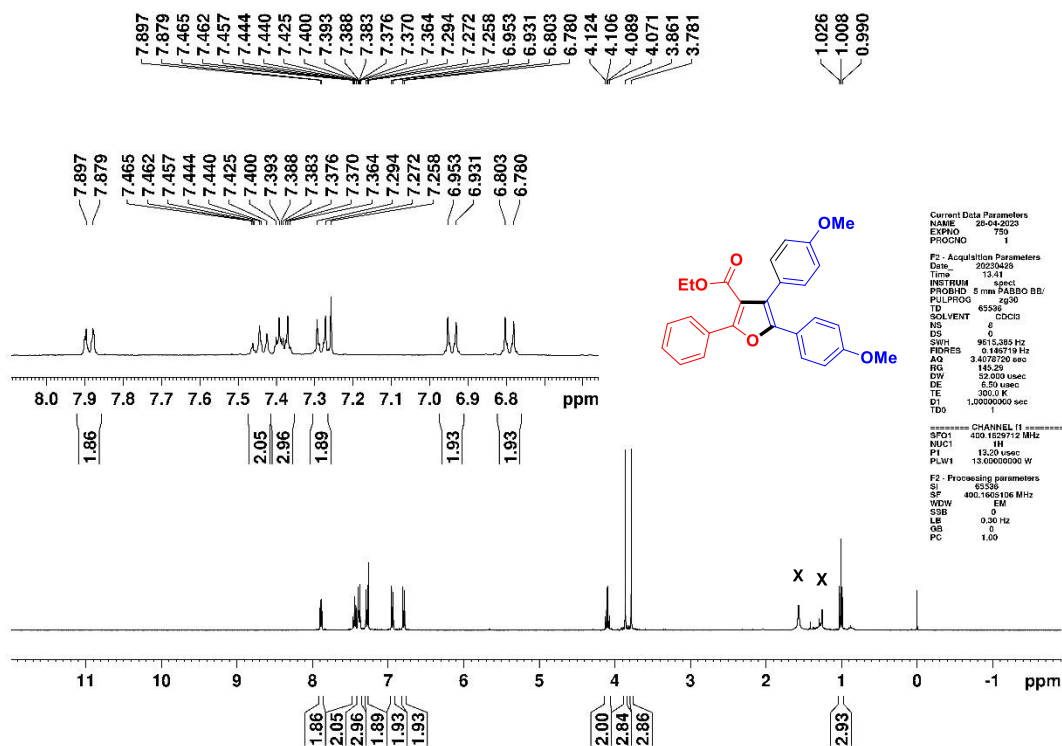

<sup>13</sup>C NMR Spectrum of compound- 3ac (100 MHz, CDCl<sub>3</sub>);

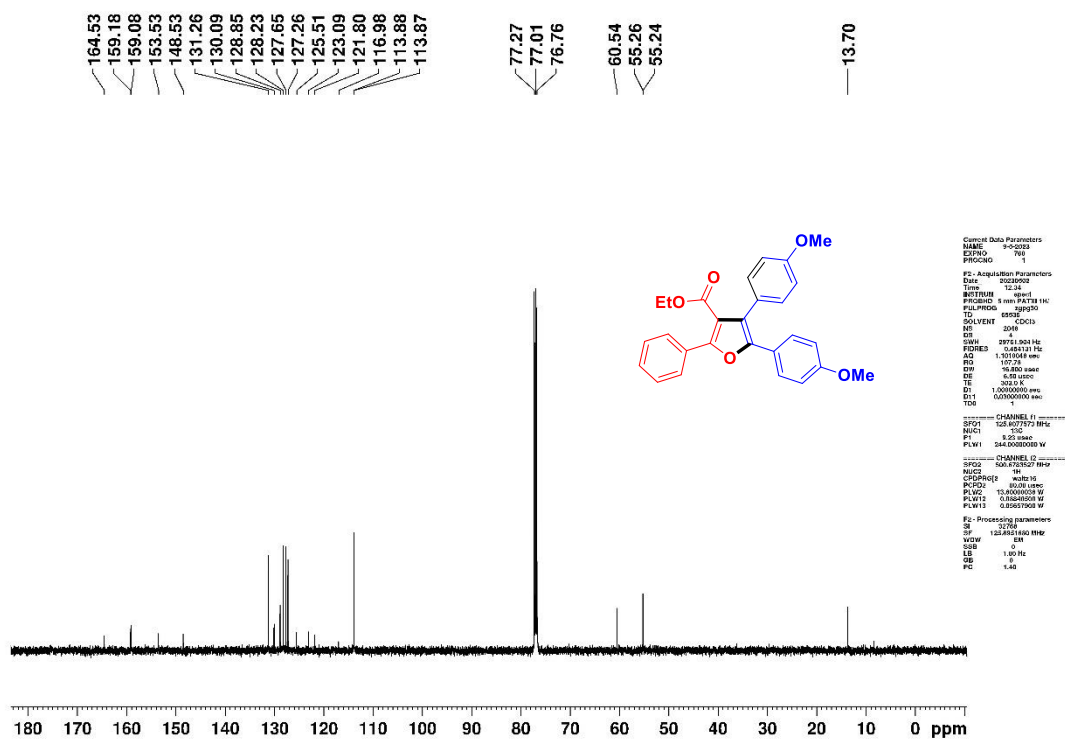



## HRMS spectrum of compound-3ac

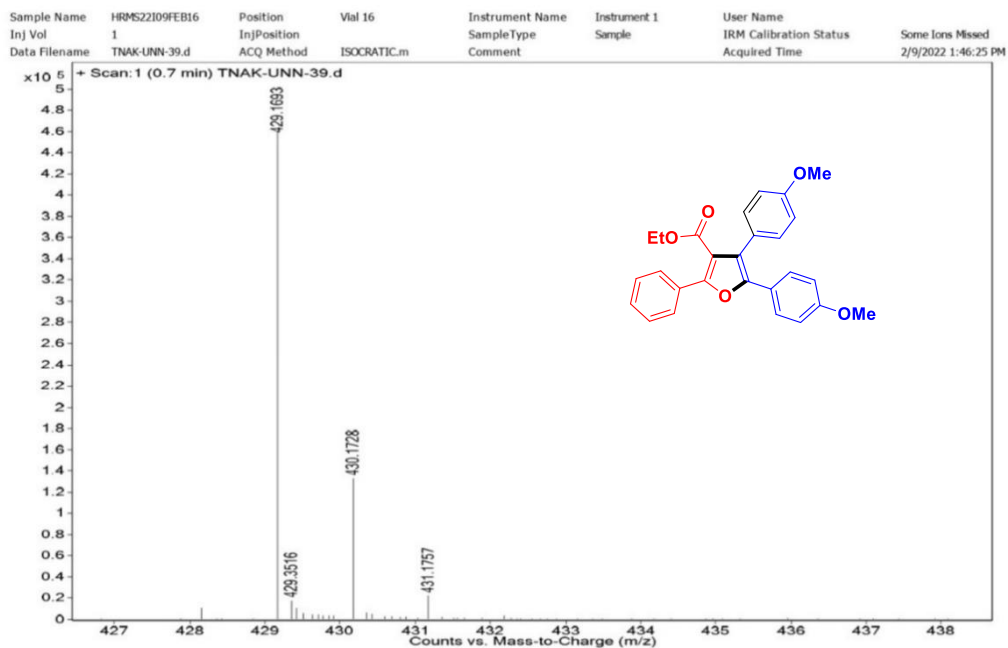

## <sup>1</sup>H NMR spectrum of compound- 3ad (400 MHz, CDCl<sub>3</sub>); X= wax impurity

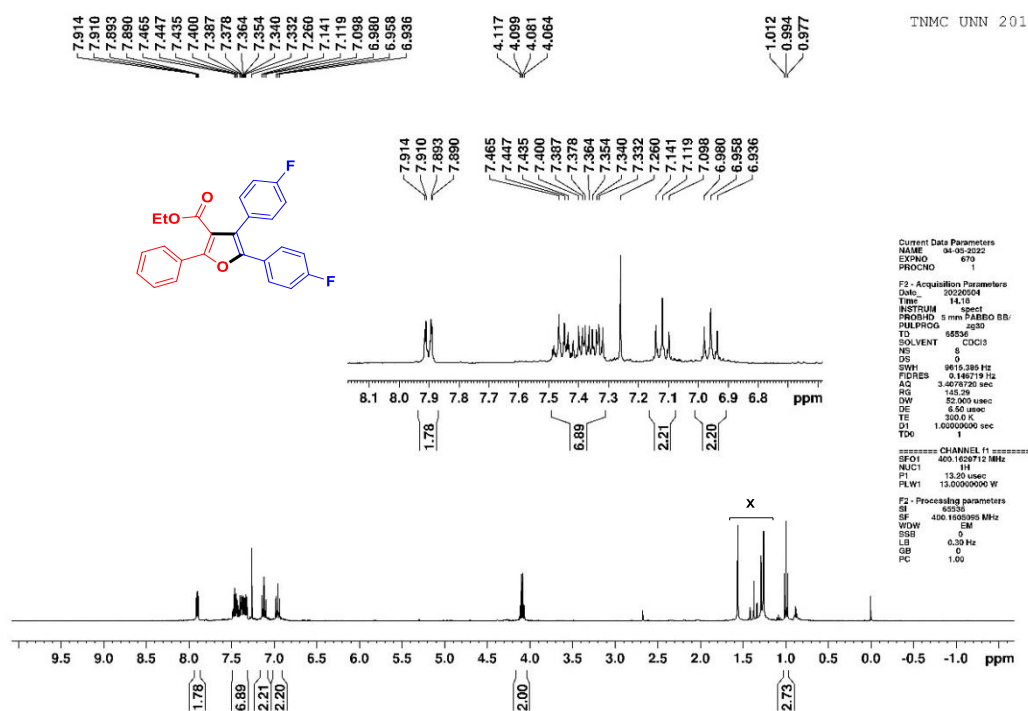

<sup>13</sup>C NMR spectrum of compound- 3ad (100 MHz, CDCl<sub>3</sub>); X= wax impurity

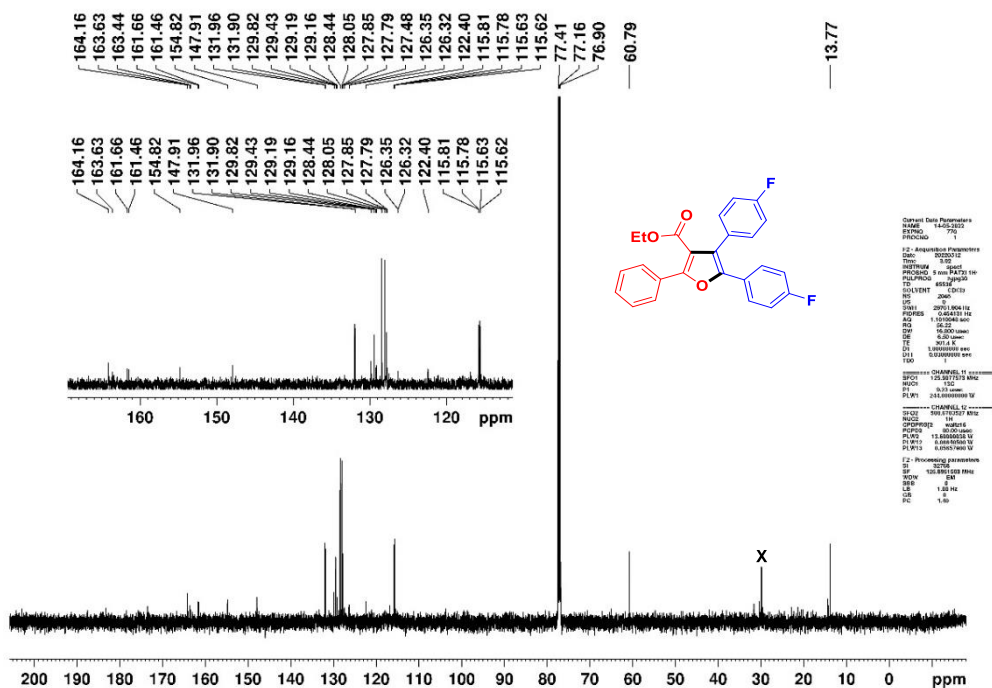

HRMS spectrum of compound-3ad

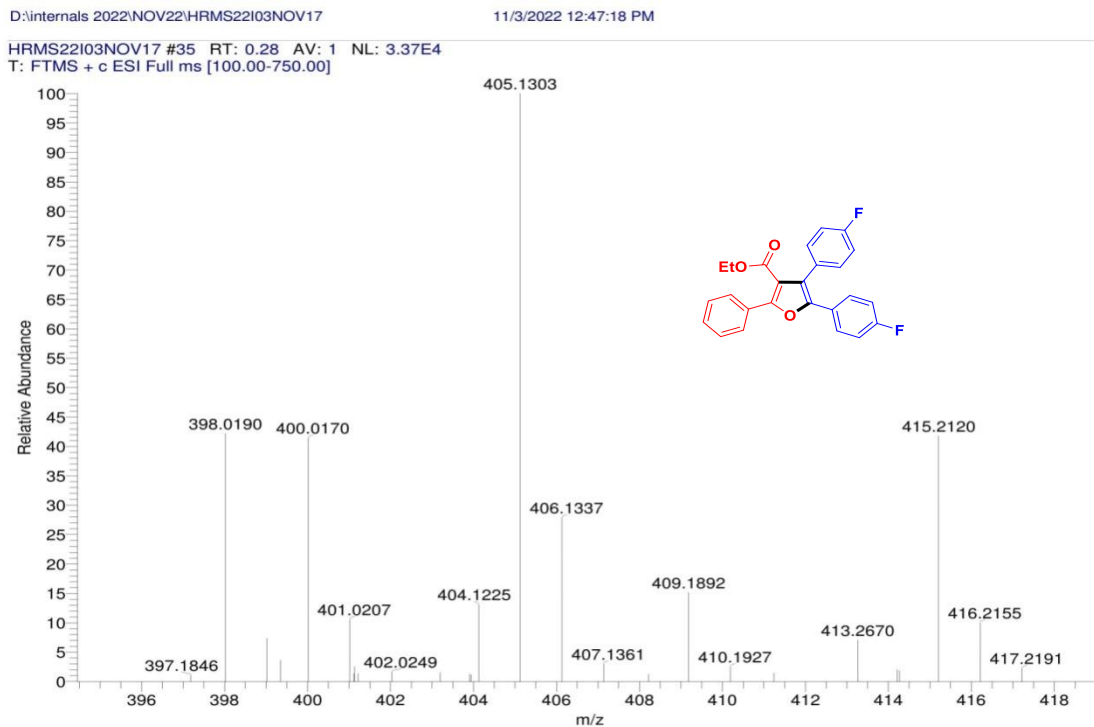

<sup>1</sup>H NMR spectrum of compound- 3ba (400 MHz, CDCl<sub>3</sub>)

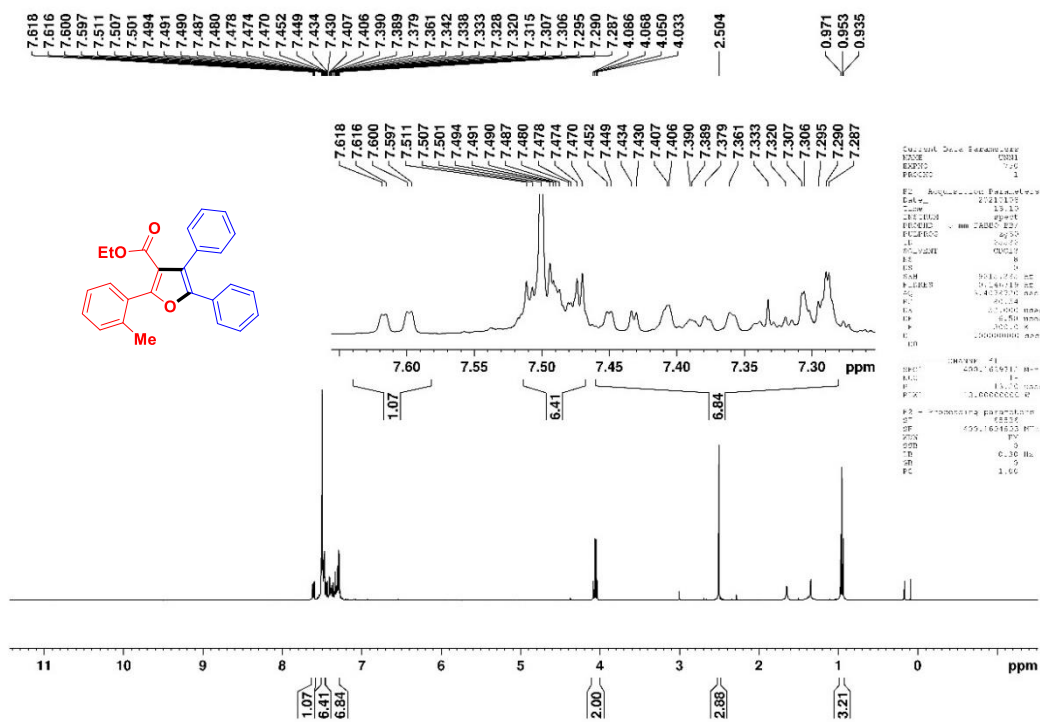

<sup>13</sup>C NMR spectrum of compound- 3ba (100 MHz, CDCl<sub>3</sub>)

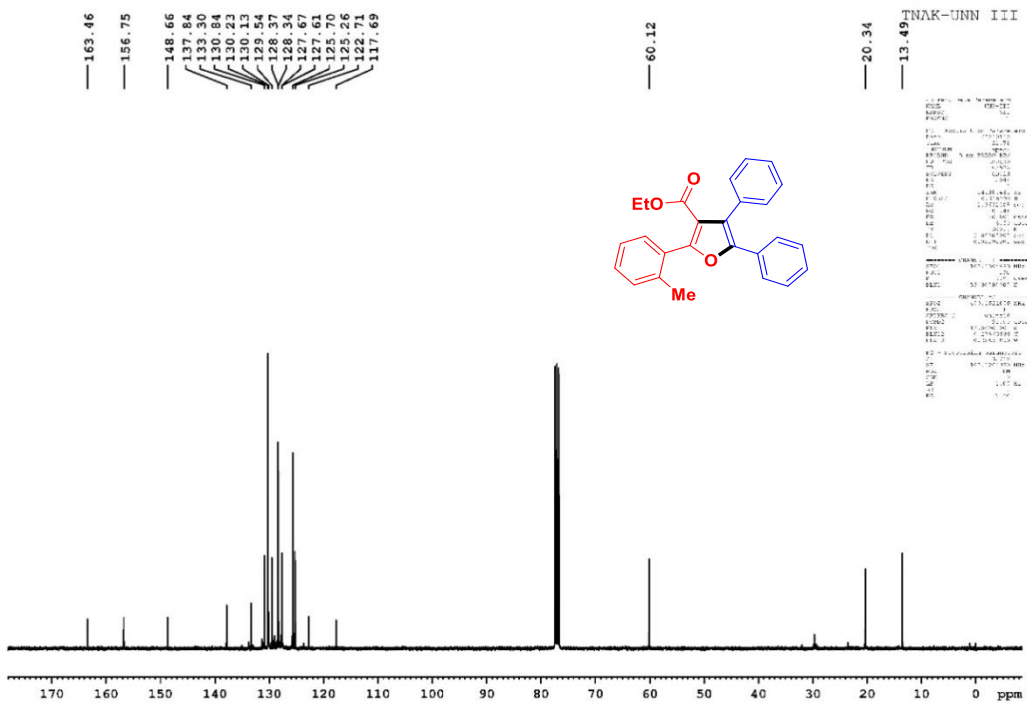

## HRMS spectrum of compound-3ba

|                                        |                                              |      |
|----------------------------------------|----------------------------------------------|------|
| Data File: HRMS21I23FEB32              | Original Data Path: D:\INTERNAL NEW\2021\Feb |      |
|                                        |                                              | 2021 |
| Sample ID: TNAK-UNN11                  | Sample Name:                                 |      |
| Acquisition Date: 02/23/21 11:33:35 AM | Run Time(min):                               | 0.00 |
| Vial: CStk1-01:32                      | Injection Volume(μl):                        | 1.00 |

HRMS21I23FEB32 #30-64 RT: 0.25-0.50 AV: 35 SB: 1 0.01 NL: 2.68E7  
T: FTMS + c ESI Full ms [100.00-750.00]

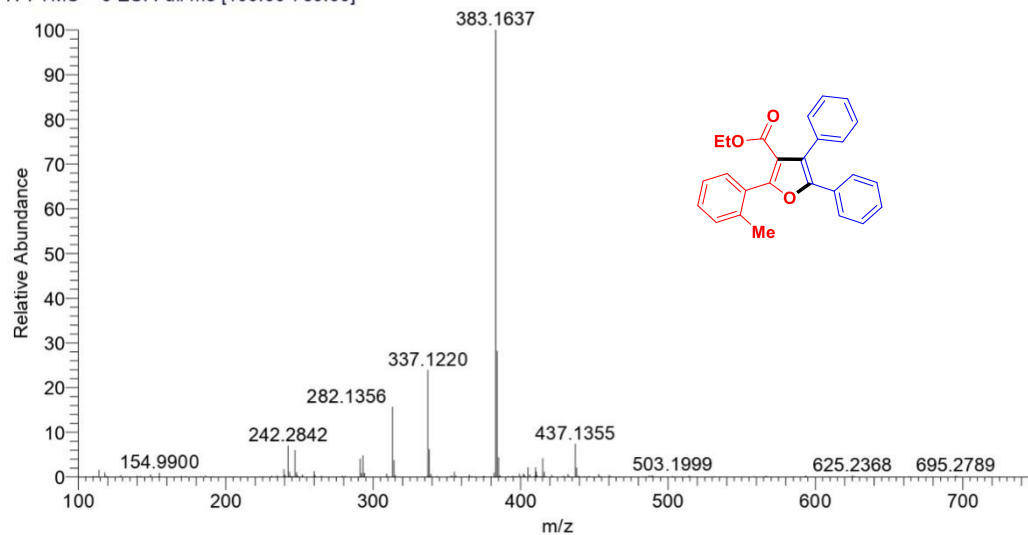

## <sup>1</sup>H NMR spectrum of compound- 3ca (400 MHz, CDCl<sub>3</sub>); X= wax impurity

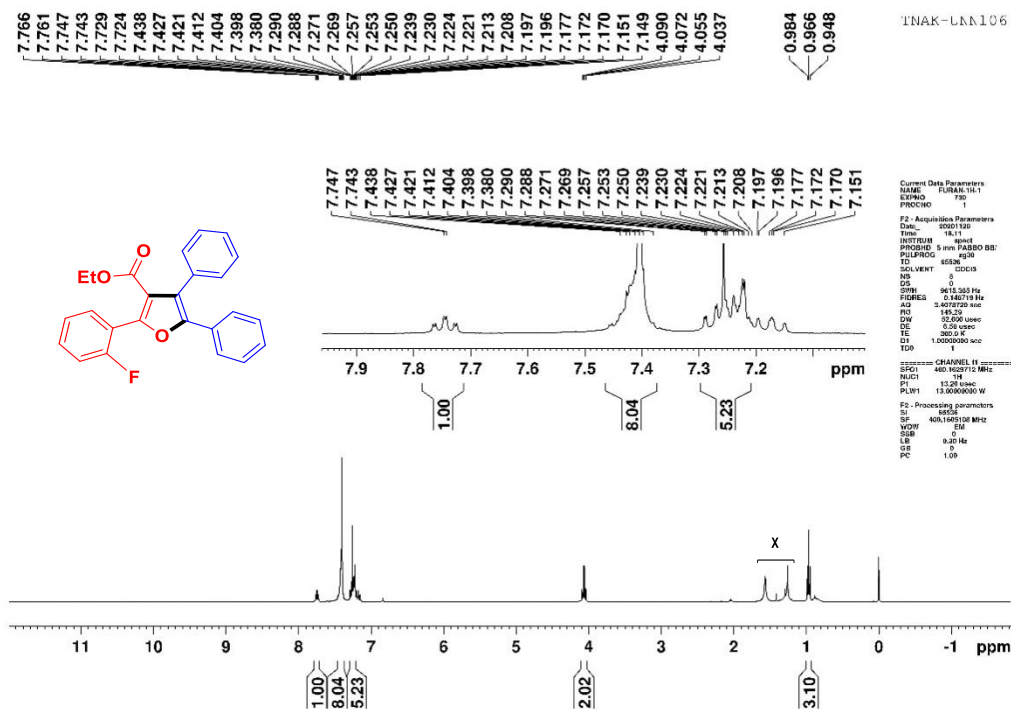

<sup>13</sup>C NMR spectrum of compound- 3ca (100 MHz, CDCl<sub>3</sub>)

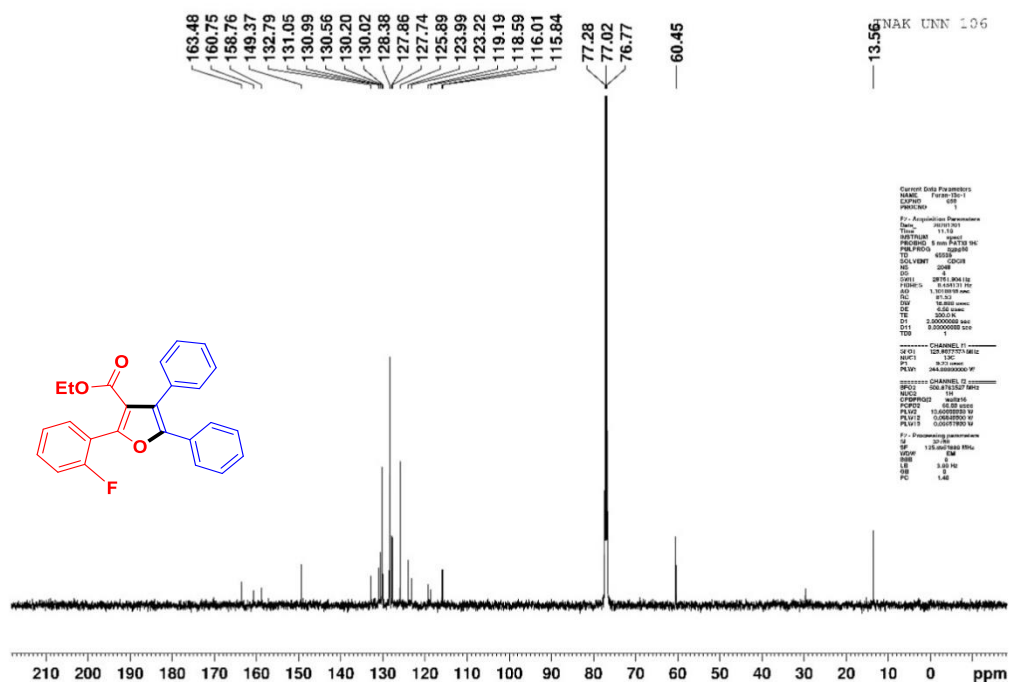

HRMS spectrum of compound-3ca

SAIF [HRMS Report]

|                   |                      |                       |                               |
|-------------------|----------------------|-----------------------|-------------------------------|
| Data File:        | HRMS20I07DEC06       | Original Data Path:   | D:\INTERNAL NEW\2020\DEC 2020 |
| Sample ID:        | TNAKUNN106           | Sample Name:          |                               |
| Acquisition Date: | 12/07/20 12:46:18 PM | Run Time(min):        | 0.00                          |
| Vial:             | CS1k1-01:6           | Injection Volume(μl): | 1.00                          |

HRMS20I07DEC06 #30-62 RT: 0.25-0.50 AV: 33 SB: 1 0.01 NL: 2.41E6  
T: FTMS + c ESI Full ms [100.00-750.00]

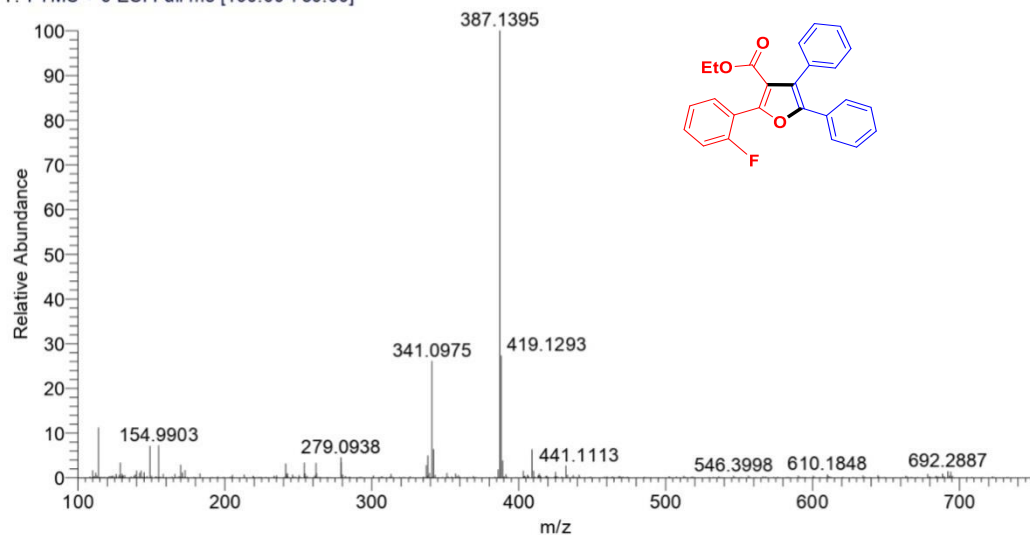

<sup>1</sup>H NMR spectrum of compound- 3da (400 MHz, CDCl<sub>3</sub>);

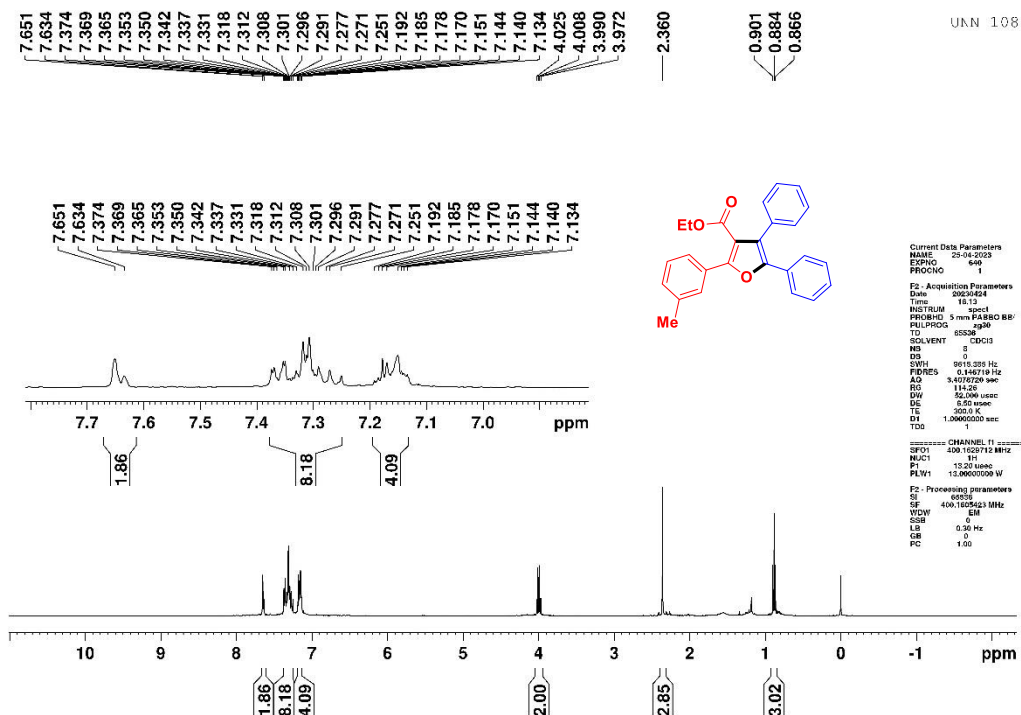

<sup>13</sup>C NMR spectrum of compound- 3da (100 MHz, CDCl<sub>3</sub>)

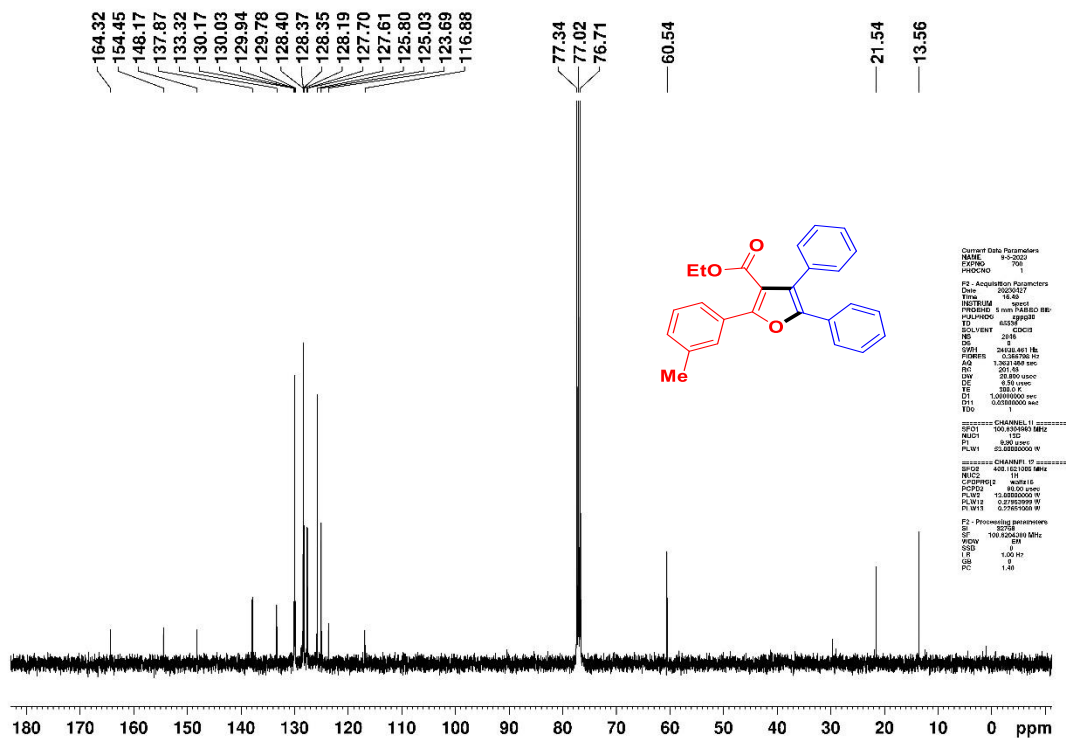

# HRMS spectrum of compound -3da

## SAIF [HRMS Report]

Data File: HRMS20I07DEC07 Original Data Path: D:\INTERNAL NEW\2020\DEC  
 Sample ID: TNAKUNN108 Sample Name: 2020  
 Acquisition Date: 12/07/20 12:48:17 PM Run Time(min): 0.00  
 Vial: CStk1-01:7 Injection Volume(μl): 1.00

HRMS20I07DEC07 #31-64 RT: 0.25-0.50 AV: 34 SB: 1 0.01 NL: 1.54E7  
 T: FTMS + c ESI Full ms [100.00-750.00]

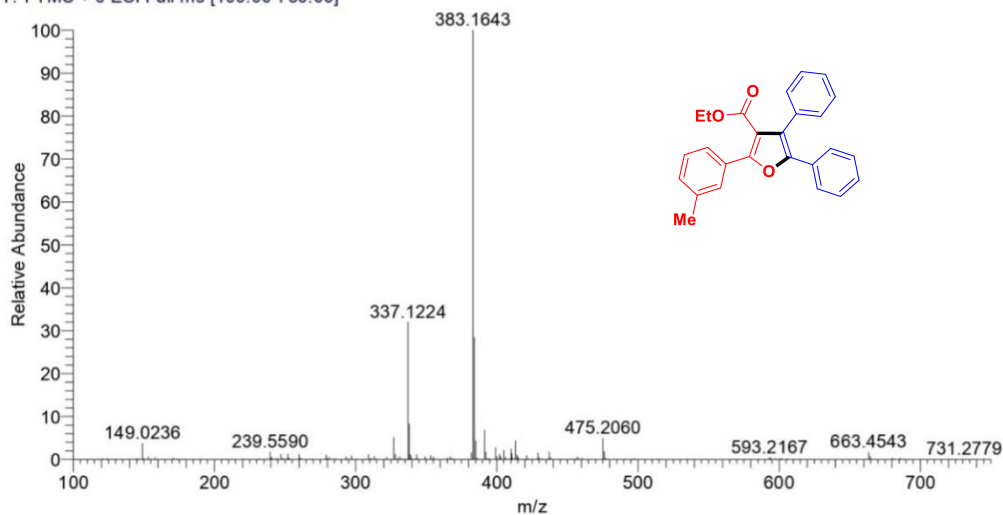

## <sup>1</sup>H NMR spectrum of compound- 3dc (400 MHz, CDCl<sub>3</sub>)

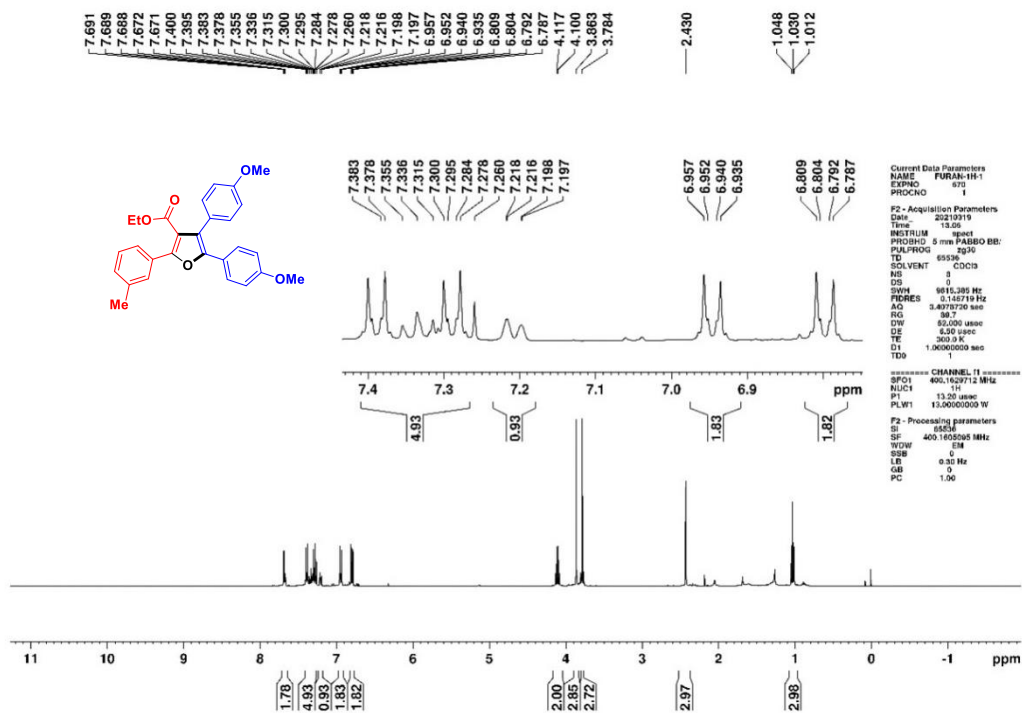

<sup>13</sup>C NMR spectrum of compound- dc (100 MHz, CDCl<sub>3</sub>)

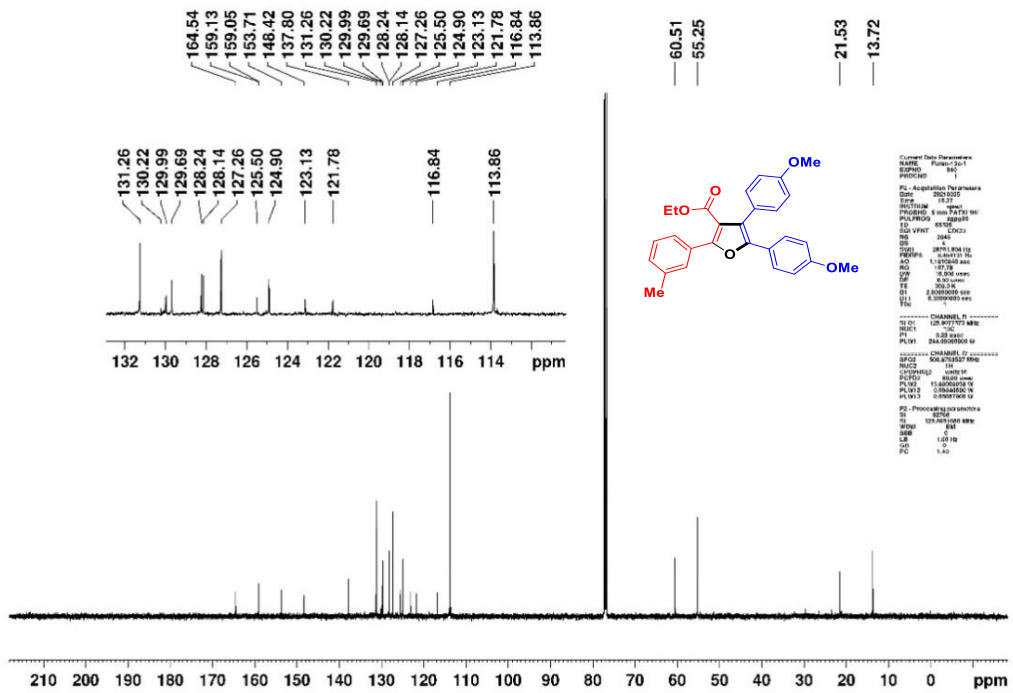

HRMS spectrum of compound-3dc

|                   |                      |                       |                                 |
|-------------------|----------------------|-----------------------|---------------------------------|
| Data File:        | HRMS21I06APR22       | Original Data Path:   | D:\INTERNAL NEW\2021\April 2021 |
| Sample ID:        | TNAKUNN127           | Sample Name:          |                                 |
| Acquisition Date: | 04/06/21 11:30:07 AM | Run Time(min):        | 0.00                            |
| Vial:             | CStk1-01:22          | Injection Volume(µl): | 1.00                            |

HRMS21I06APR22 #33-67 RT: 0.25-0.50 AV: 35 SB: 1 0.01 NL: 9.00E6  
T: FTMS + c ESI Full ms [100.00-750.00]

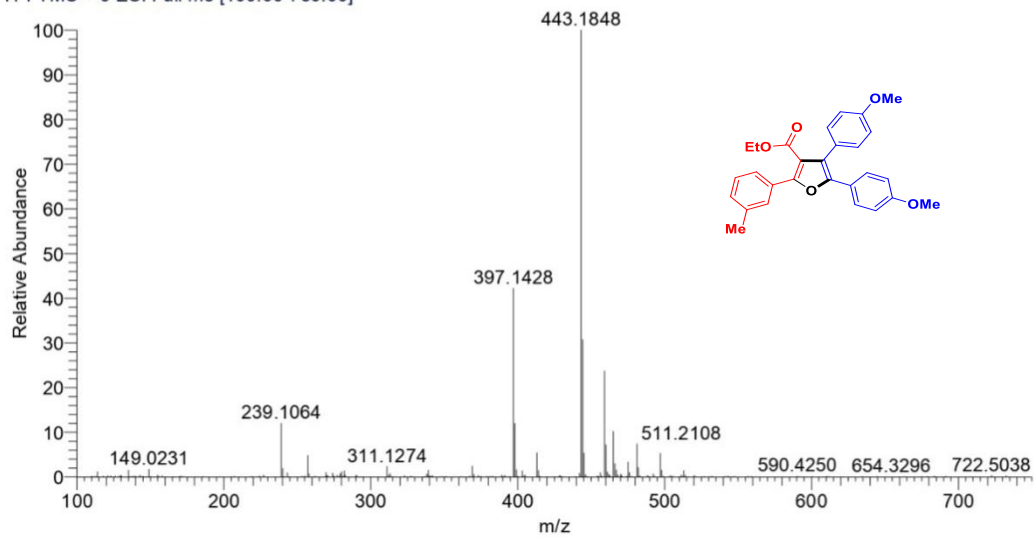



<sup>1</sup>H NMR spectrum of compound- 3de (400 MHz, CDCl<sub>3</sub>)

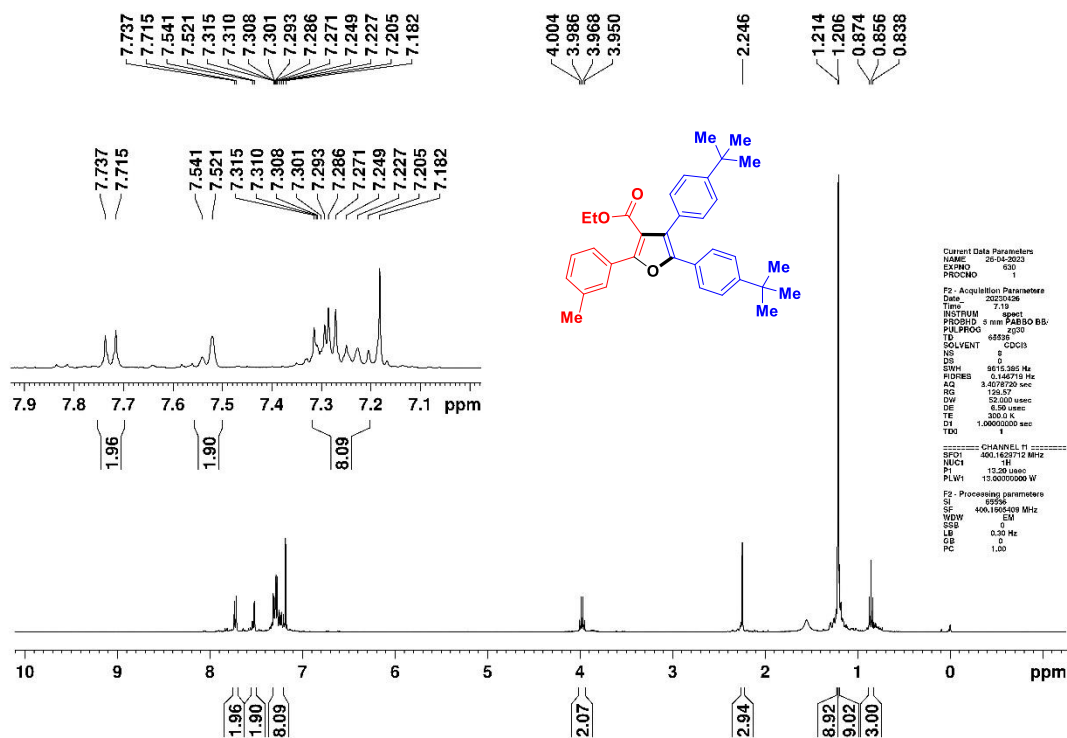

<sup>13</sup>C NMR spectrum of compound- 3de (100 MHz, CDCl<sub>3</sub>)

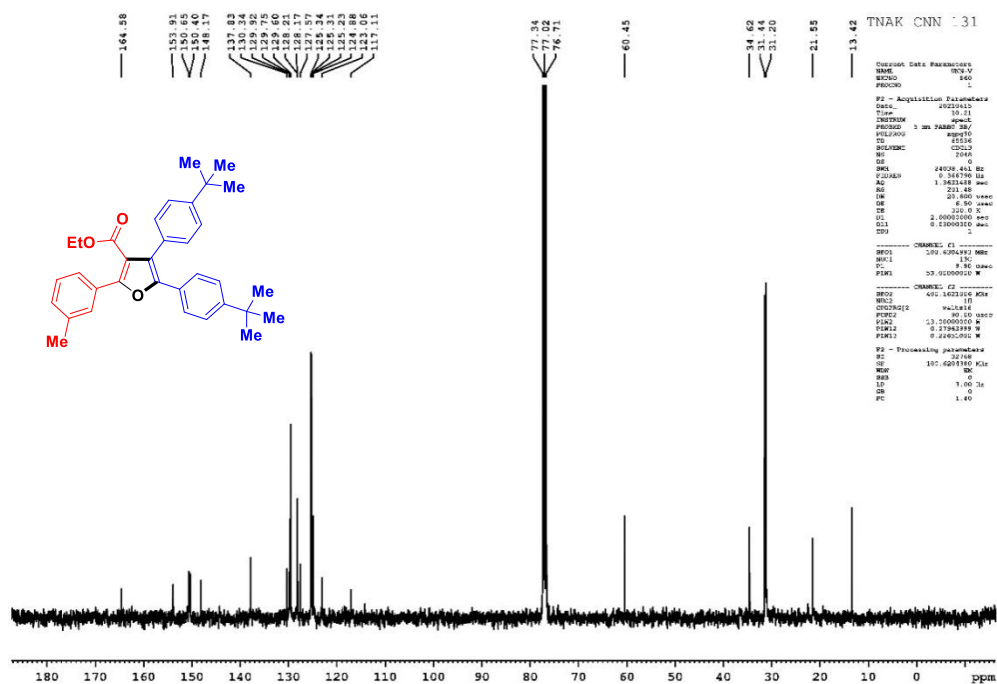

### HRMS spectrum of compound-3de

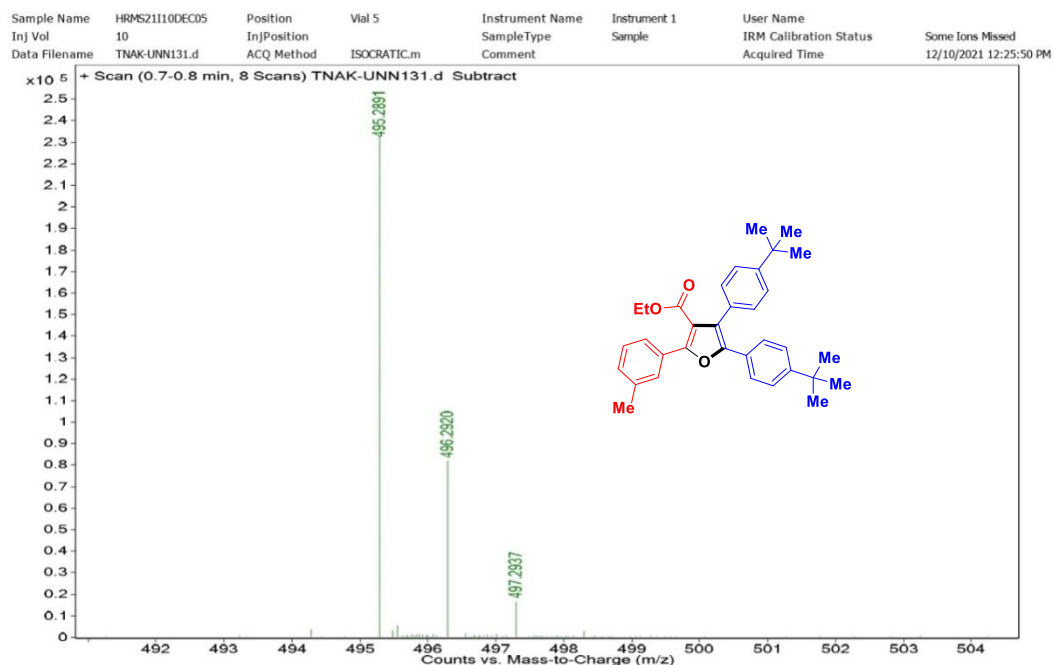

### <sup>1</sup>H NMR spectrum of compound- 3dd (400 MHz, CDCl<sub>3</sub>); X= wax impurity

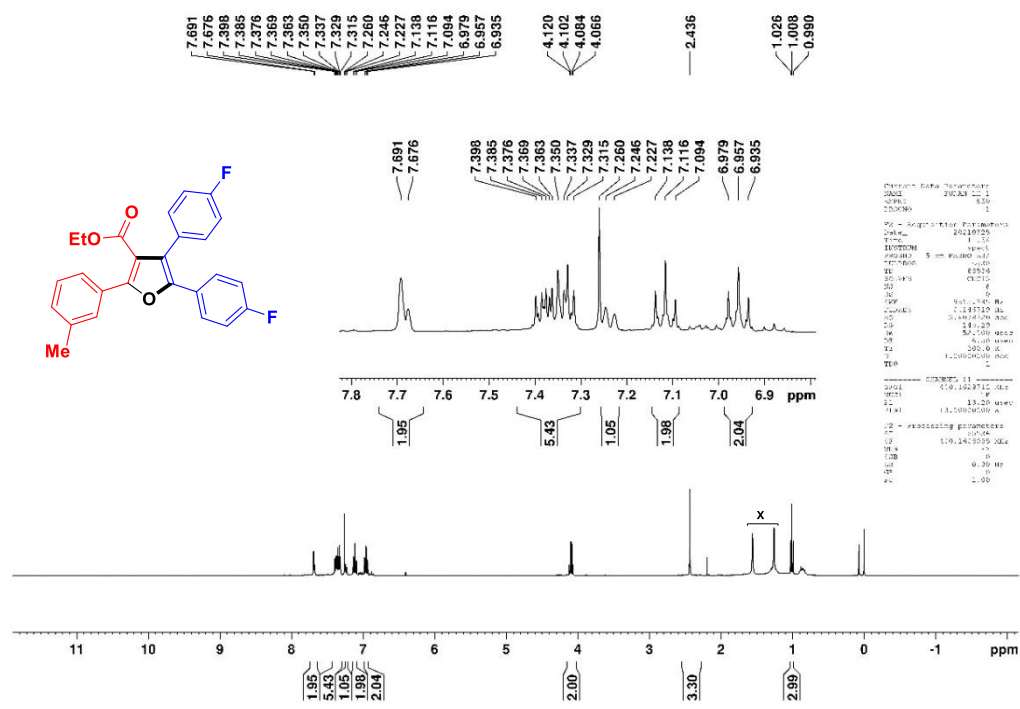

<sup>13</sup>C NMR spectrum of compound- 3dd (100 MHz, CDCl<sub>3</sub>)

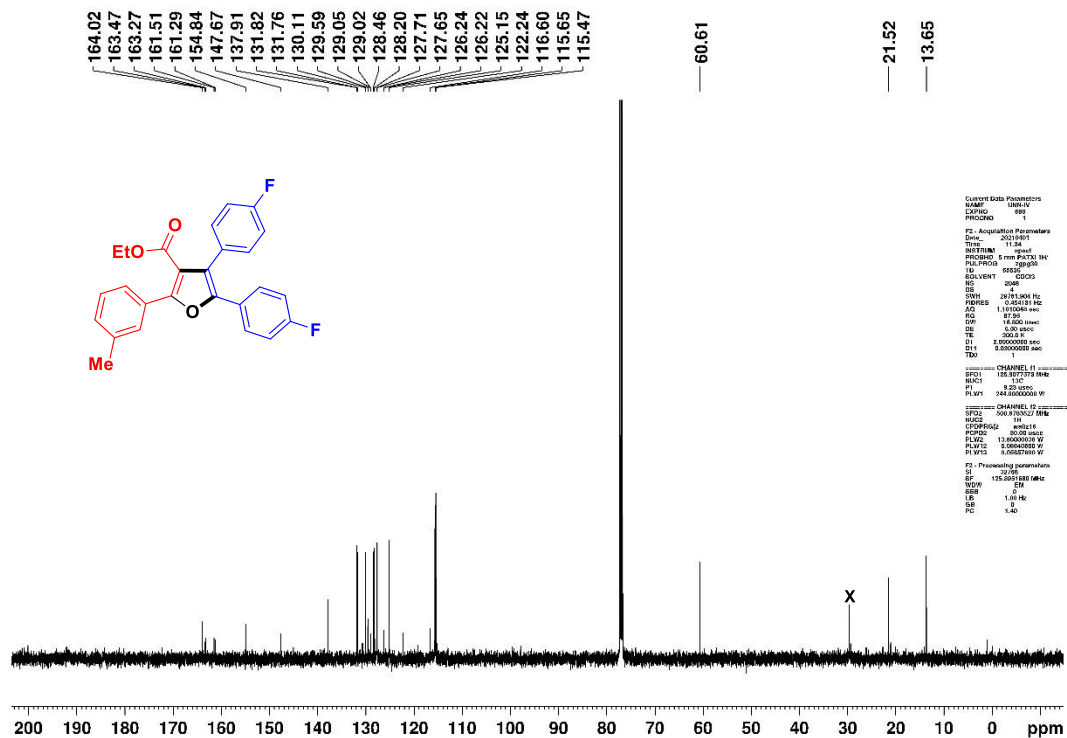

HRMS spectrum of compound-3dd

|                   |                      |                       |                                 |
|-------------------|----------------------|-----------------------|---------------------------------|
| Data File:        | HRMS21I06APR23       | Original Data Path:   | D:\INTERNAL NEW\2021\April 2021 |
| Sample ID:        | TNAKUNN128           | Sample Name:          |                                 |
| Acquisition Date: | 04/06/21 11:32:08 AM | Run Time(min):        | 0.00                            |
| Vial:             | CStk1-01:23          | Injection Volume(μl): | 1.00                            |

HRMS21I06APR23 #33-66 RT: 0.25-0.50 AV: 34 SB: 1 0.01 NL: 3.90E6  
 T: FTMS + c ESI Full ms [100.00-750.00]

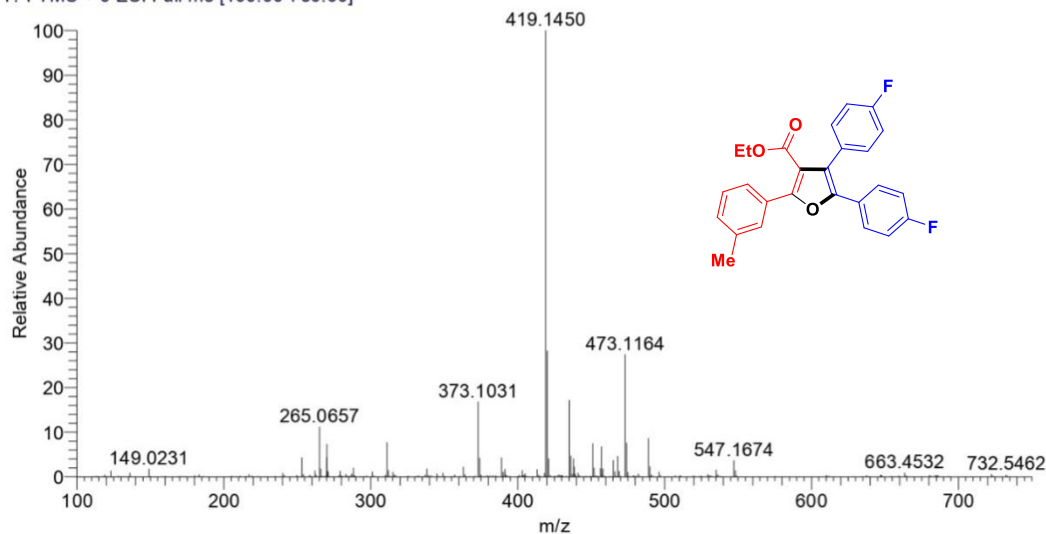

<sup>1</sup>H NMR spectrum of compound- 3ea (400 MHz, CDCl<sub>3</sub>); X= wax impurity

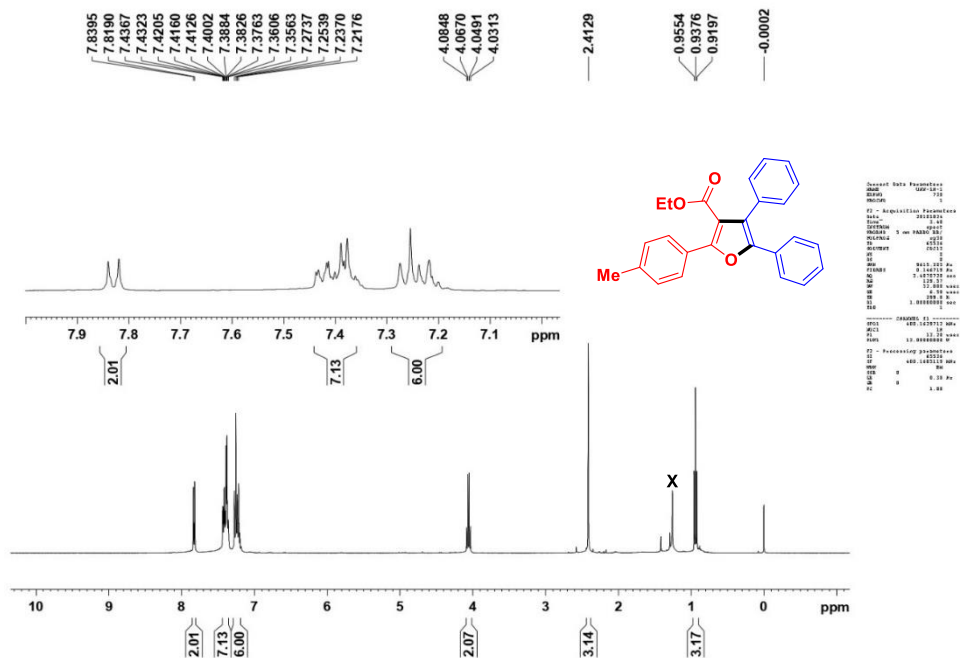

<sup>13</sup>C NMR spectrum of compound- 3ea (100 MHz, CDCl<sub>3</sub>); X= wax impurity

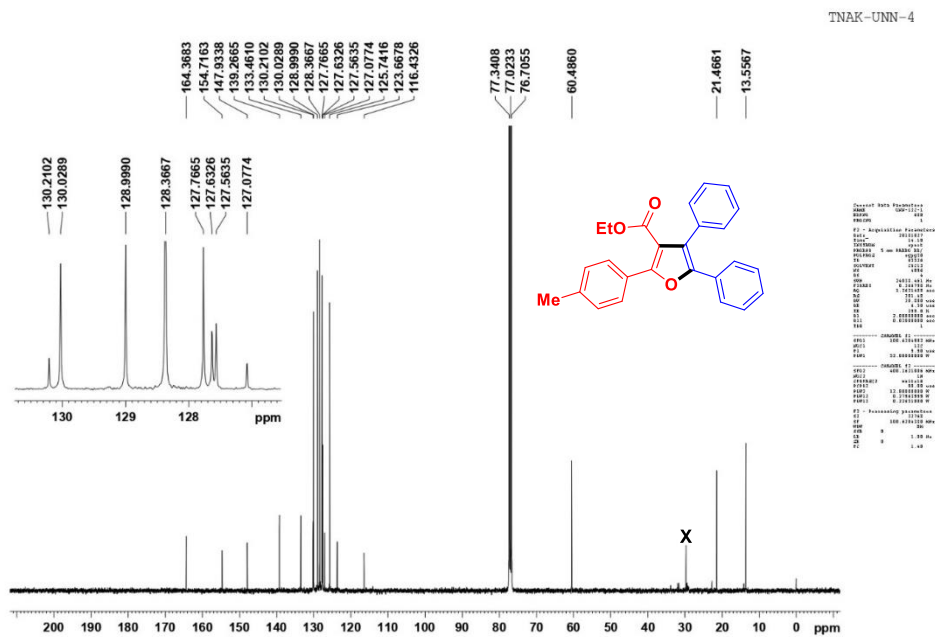

### HRMS spectrum of compound-3ea

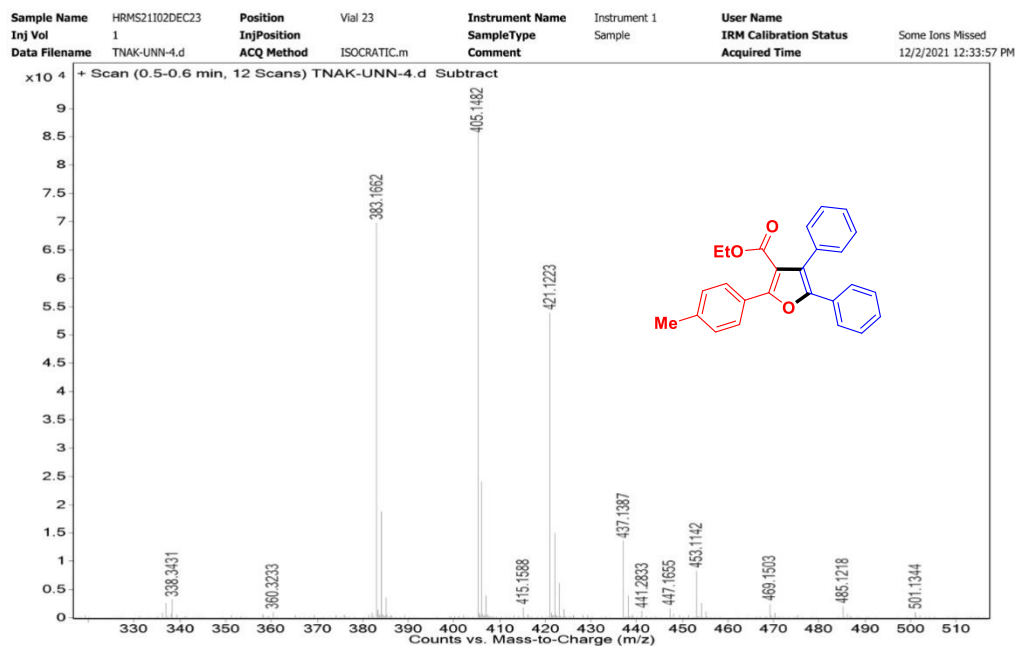

### <sup>1</sup>H NMR spectrum of compound- 3eb (400 MHz, CDCl<sub>3</sub>)

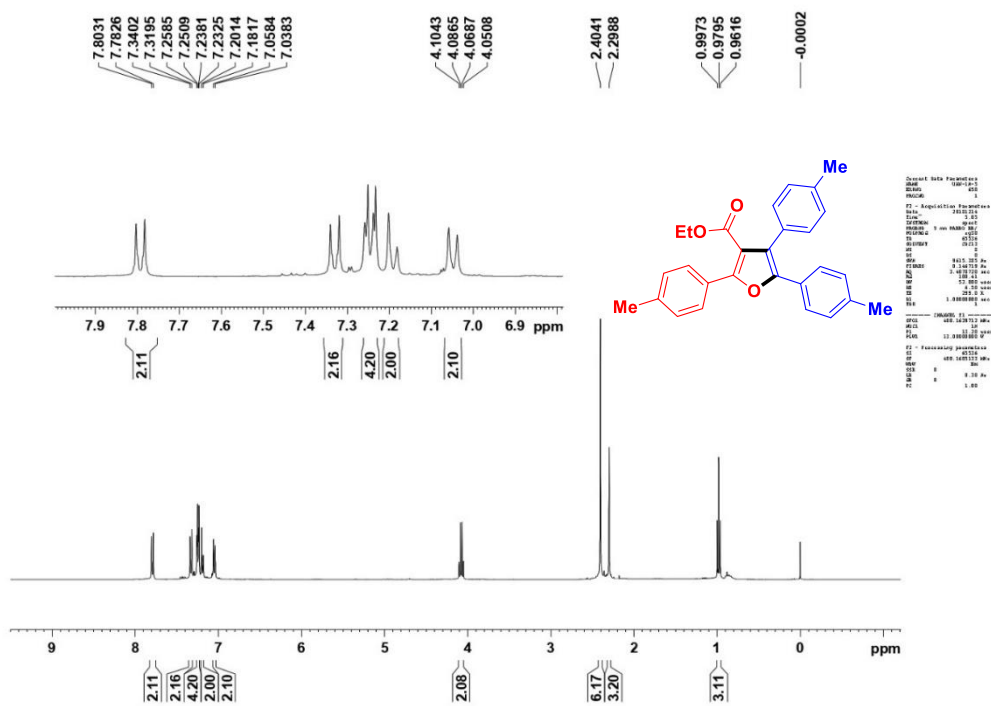

<sup>13</sup>C NMR spectrum of compound- 3eb (100 MHz, CDCl<sub>3</sub>)

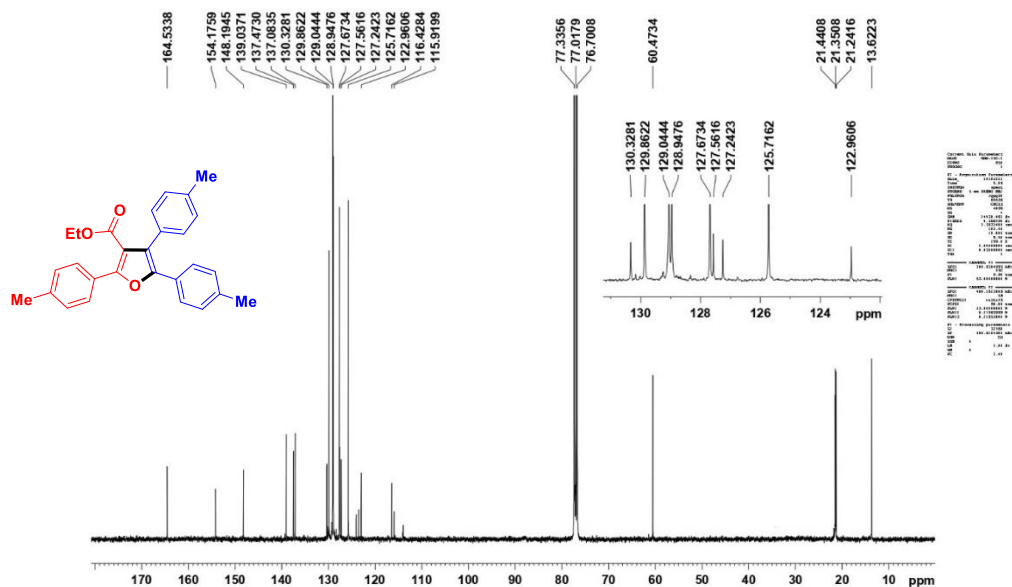

HRMS spectrum of compound-3eb

|               |                |             |             |                 |              |                        |                       |
|---------------|----------------|-------------|-------------|-----------------|--------------|------------------------|-----------------------|
| Sample Name   | HRMS21124DEC20 | Position    | Vial 20     | Instrument Name | Instrument 1 | User Name              |                       |
| Inj Vol       | 1              | InjPosition |             | SampleType      | Sample       | IRM Calibration Status | Some Ions Missed      |
| Data Filename | TNAK-UNN35.d   | ACQ Method  | ISOCRATIC.m | Comment         |              | Acquired Time          | 12/24/2021 1:42:34 PM |

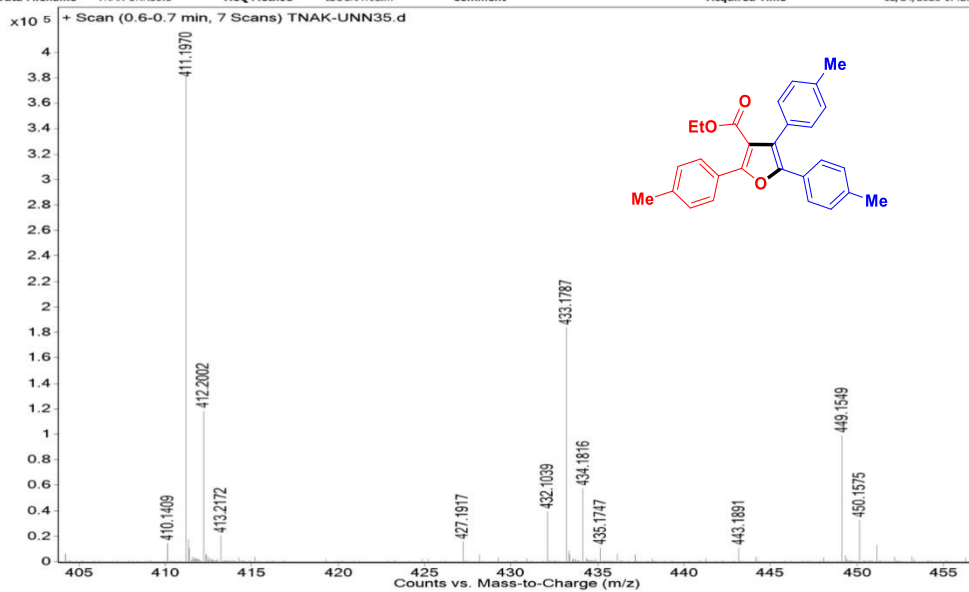

<sup>1</sup>H NMR spectrum of compound- 3ec (400 MHz, CDCl<sub>3</sub>); X= wax impurity

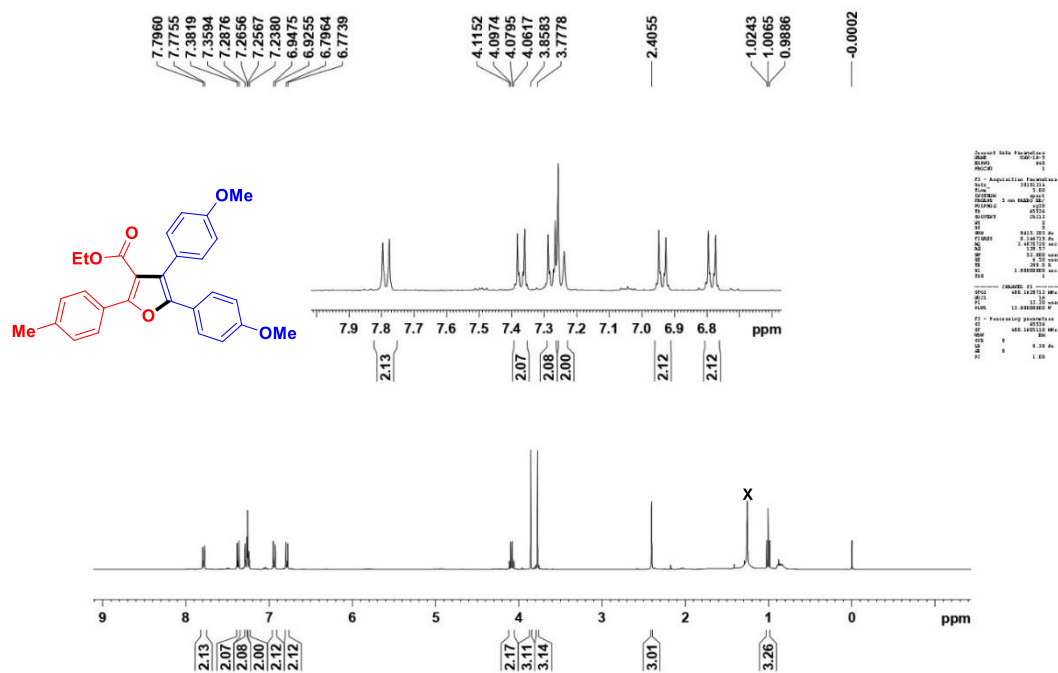

<sup>13</sup>C NMR spectrum of compound- 3ec (100 MHz, CDCl<sub>3</sub>)

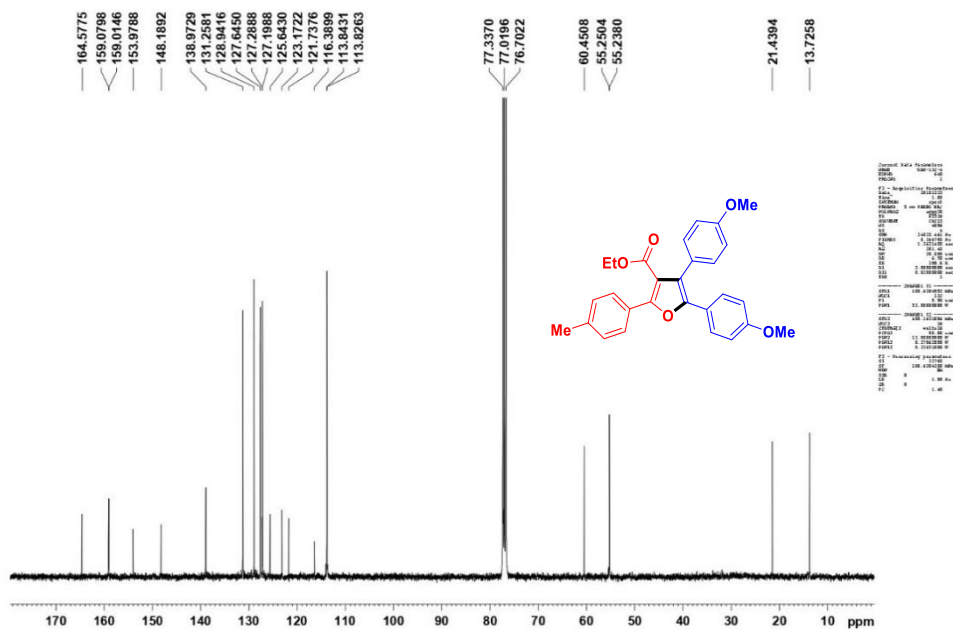

### HRMS spectrum of compound-3ec

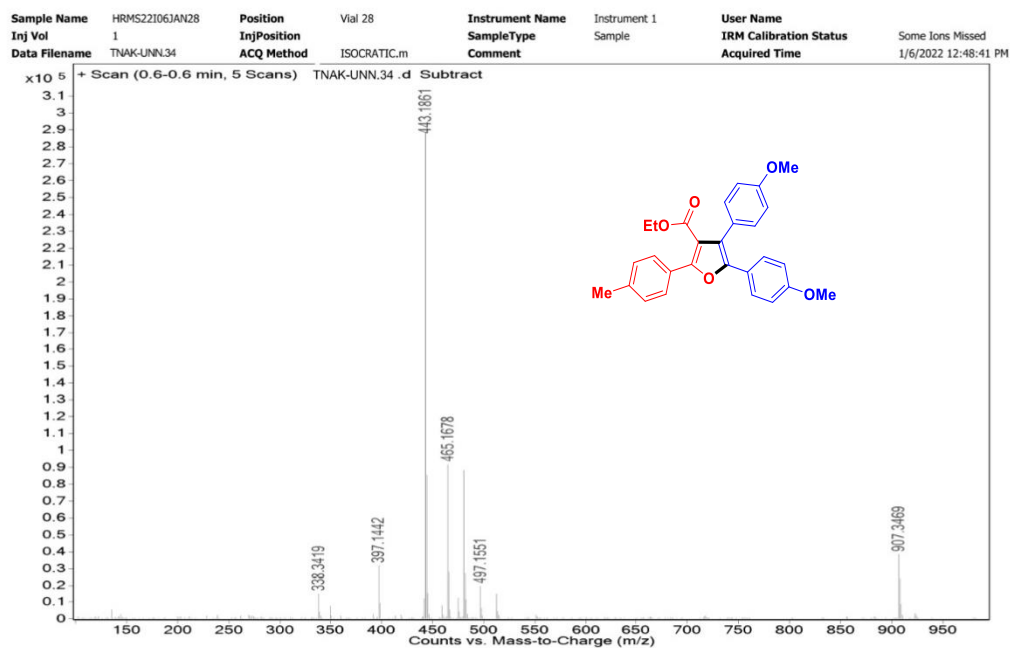

### <sup>1</sup>H NMR spectrum of compound- 3fa (400 MHz, CDCl<sub>3</sub>)

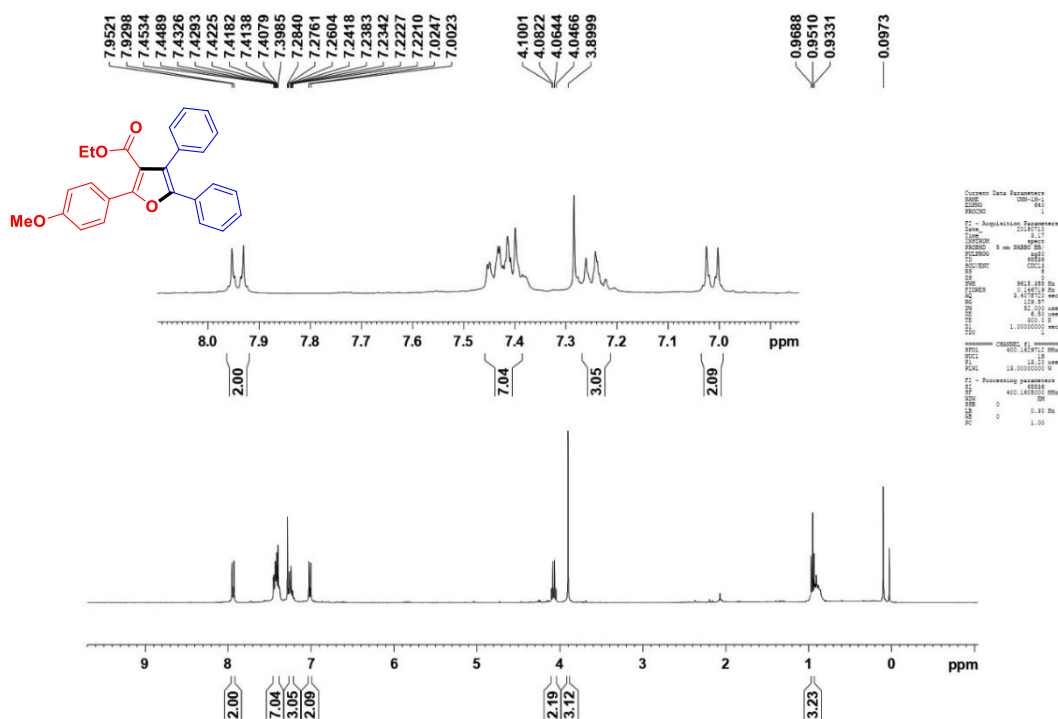



<sup>13</sup>C NMR spectrum of compound- 3fa (100 MHz, CDCl<sub>3</sub>)

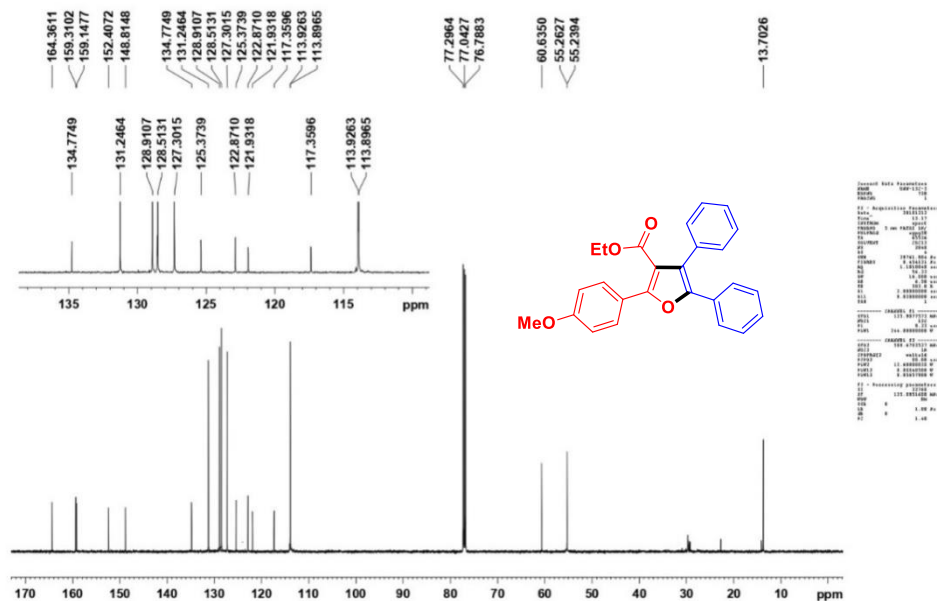

HRMS spectrum of compound-3fa

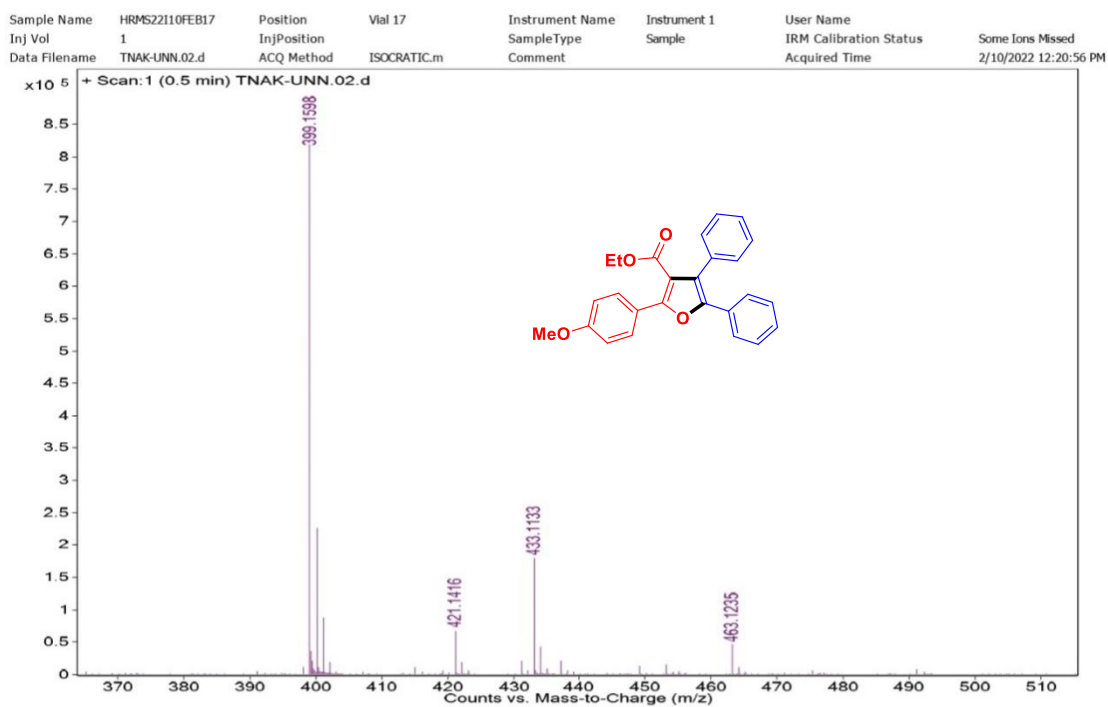

<sup>1</sup>H NMR spectrum of compound- 3ga (400 MHz, CDCl<sub>3</sub>)

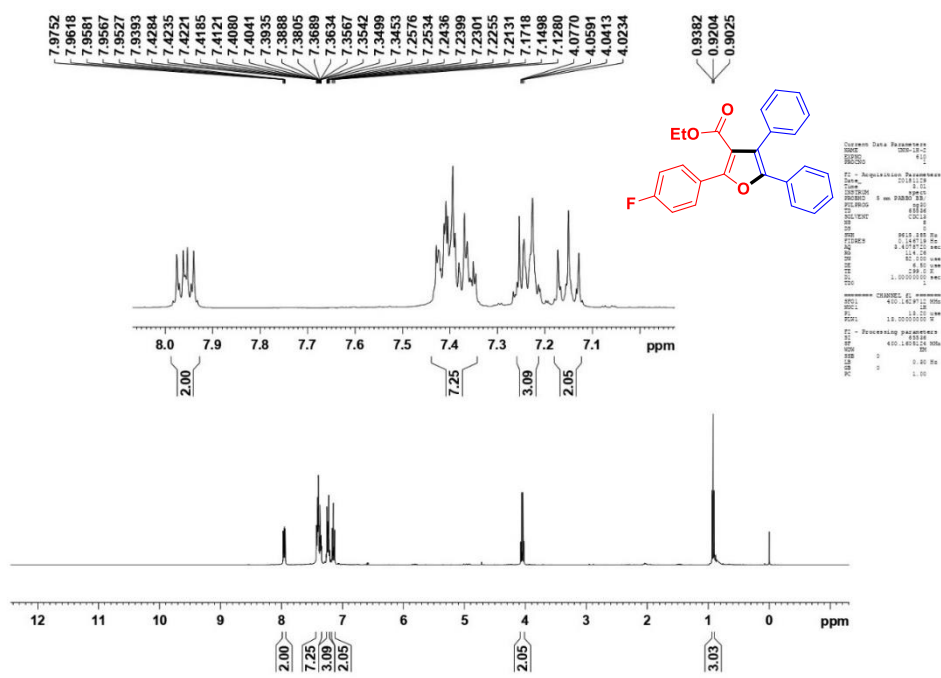

<sup>13</sup>C NMR spectrum of compound- 3ga (100 MHz, CDCl<sub>3</sub>); X= wax impurity

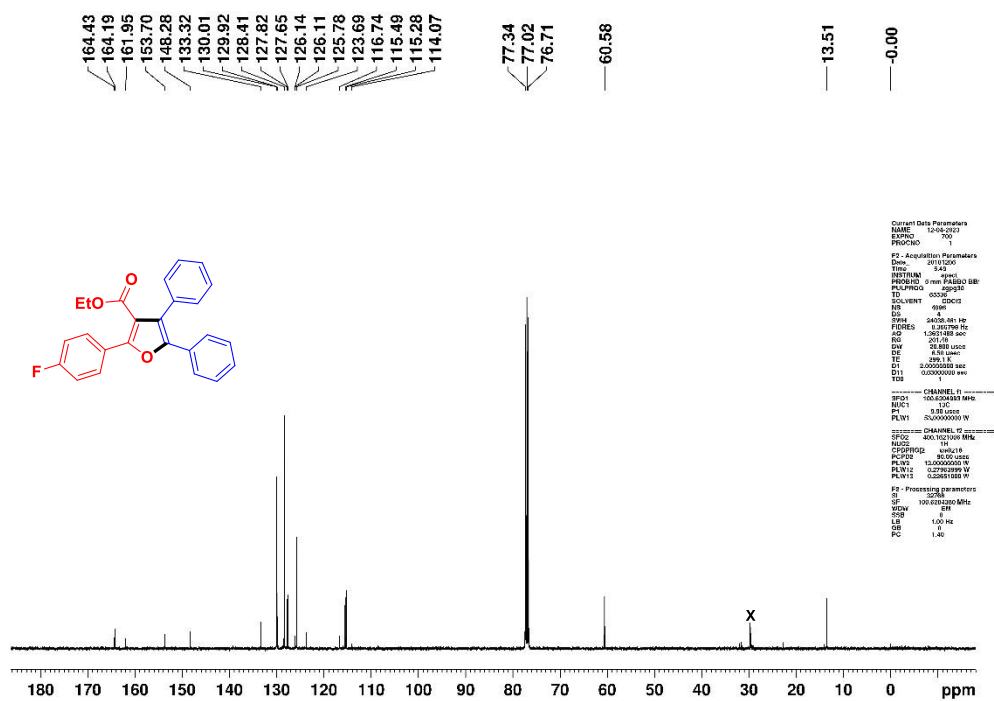

### HRMS spectrum of compound-3ga

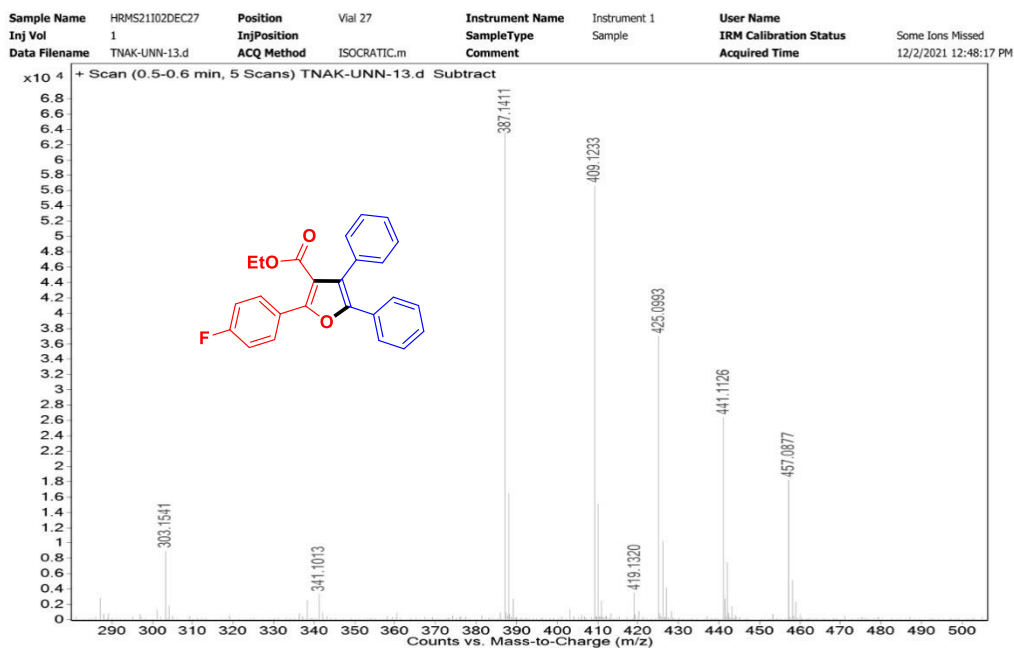

### <sup>1</sup>H NMR spectrum of compound- 3gc (400 MHz, CDCl<sub>3</sub>); X= wax impurity

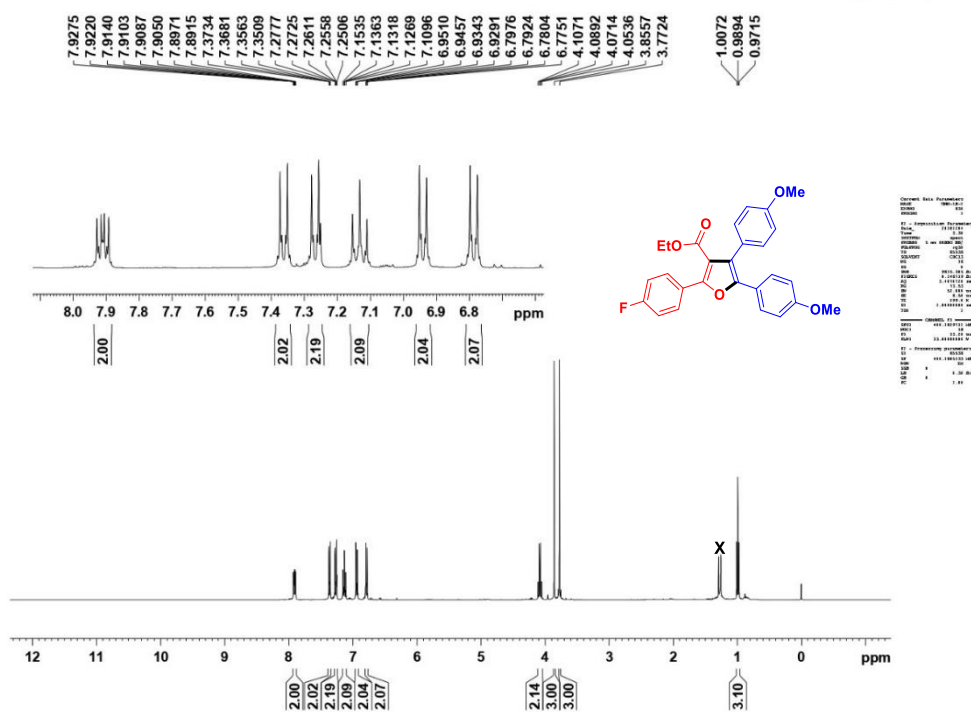

**<sup>13</sup>C NMR spectrum of compound- 3gc (100 MHz, CDCl<sub>3</sub>)**

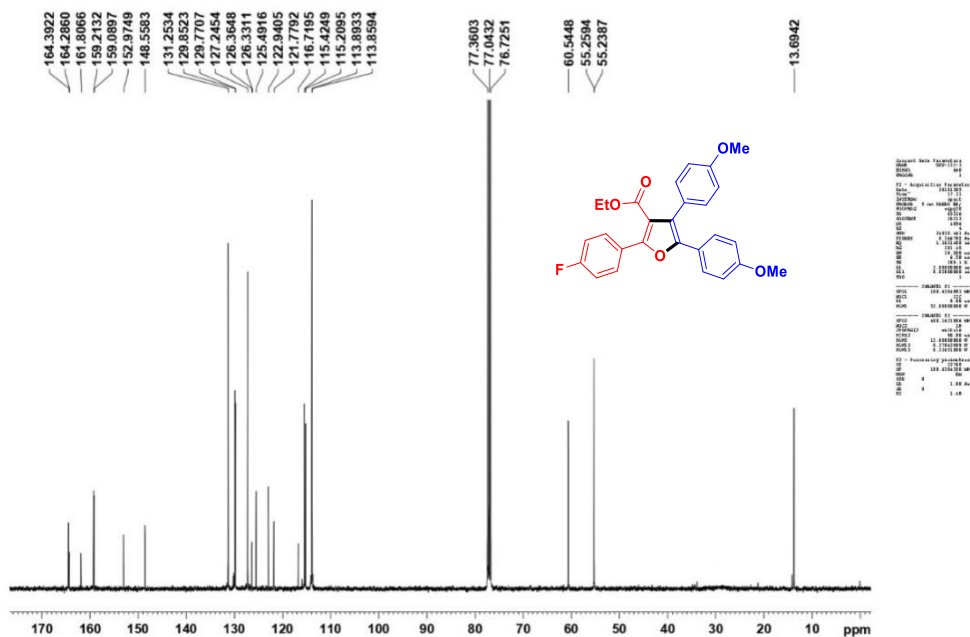

**HRMS spectrum of compound-3gc**

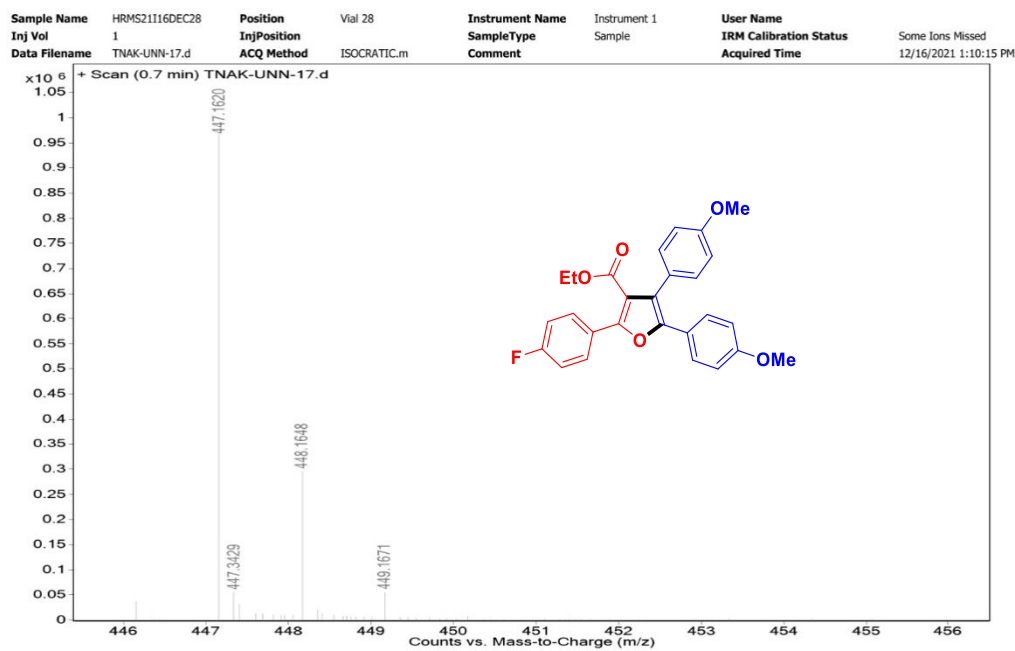

<sup>1</sup>H NMR spectrum of compound- 3gf (400 MHz, CDCl<sub>3</sub>); X= wax impurity, Y = H<sub>2</sub>O

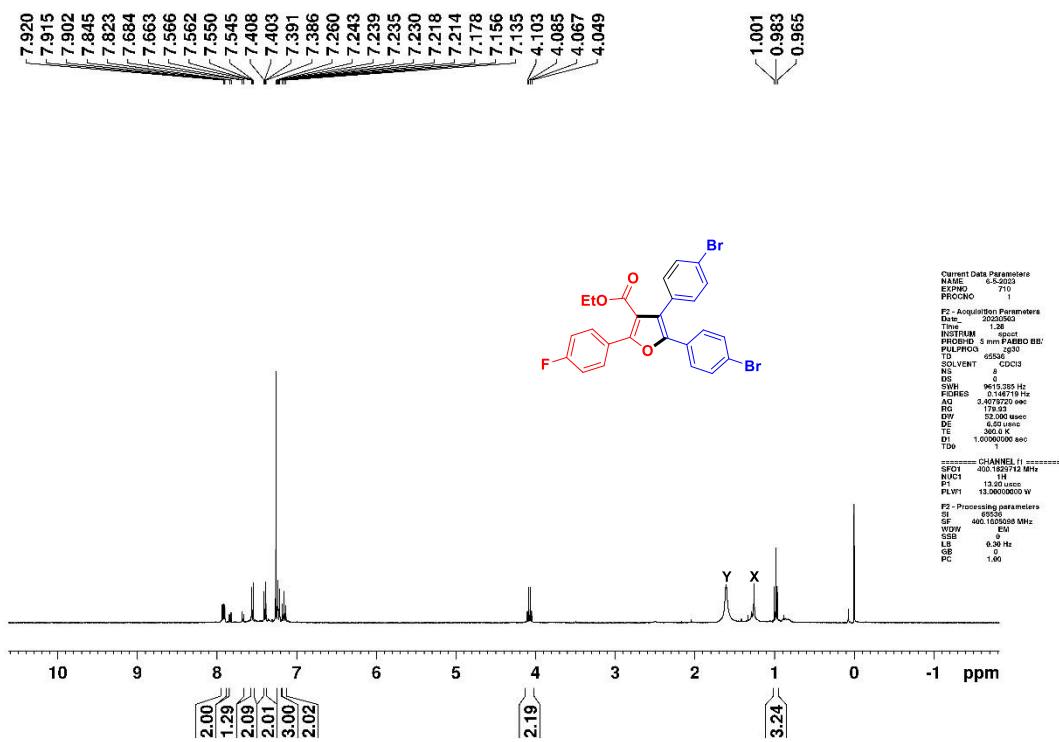

<sup>13</sup>C NMR spectrum of compound- 3gf (100 MHz, CDCl<sub>3</sub>)

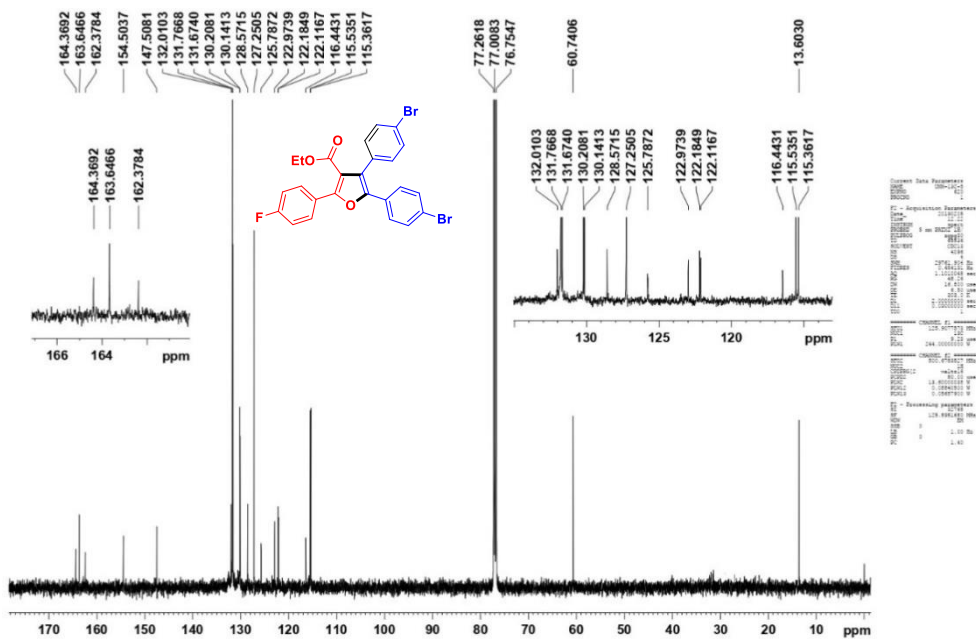

## HRMS spectrum of compound-3gf

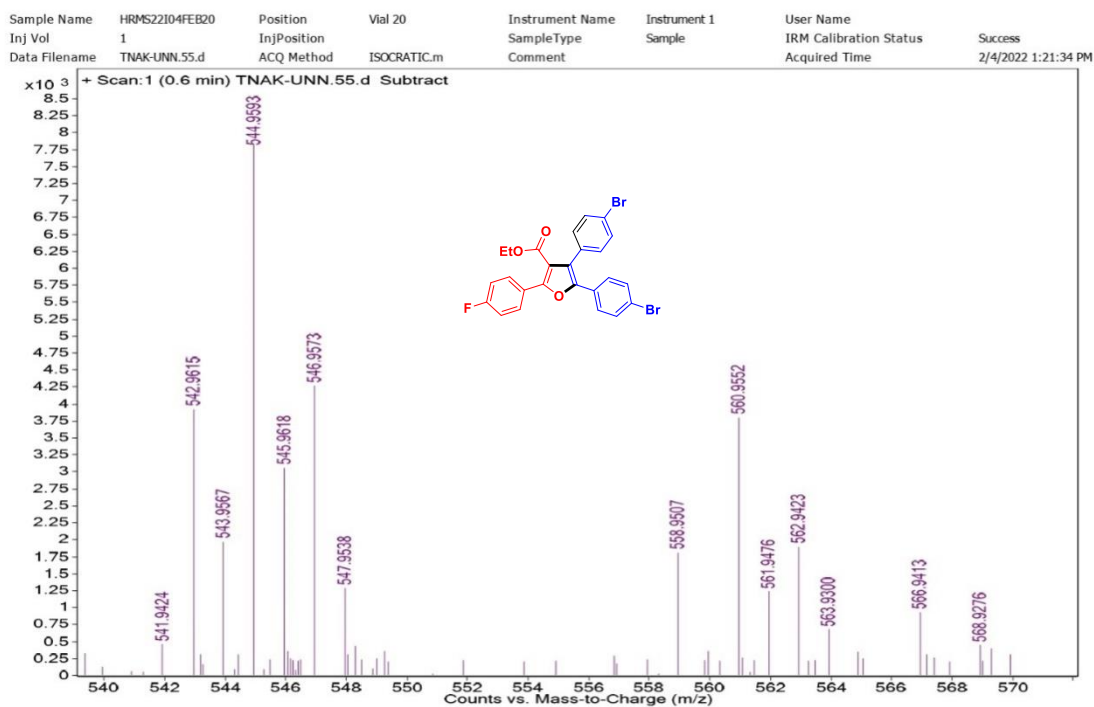

## <sup>1</sup>H NMR spectrum of compound- 3ha (400 MHz, CDCl<sub>3</sub>); X= wax impurity

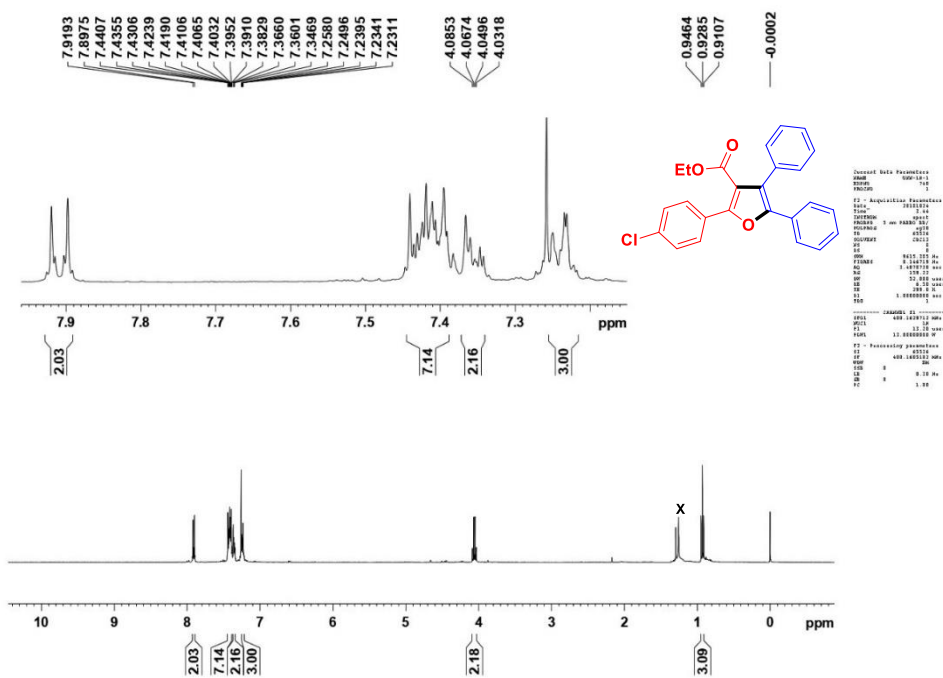

<sup>13</sup>C NMR spectrum of compound- 3ha (100 MHz, CDCl<sub>3</sub>); X= wax impurity

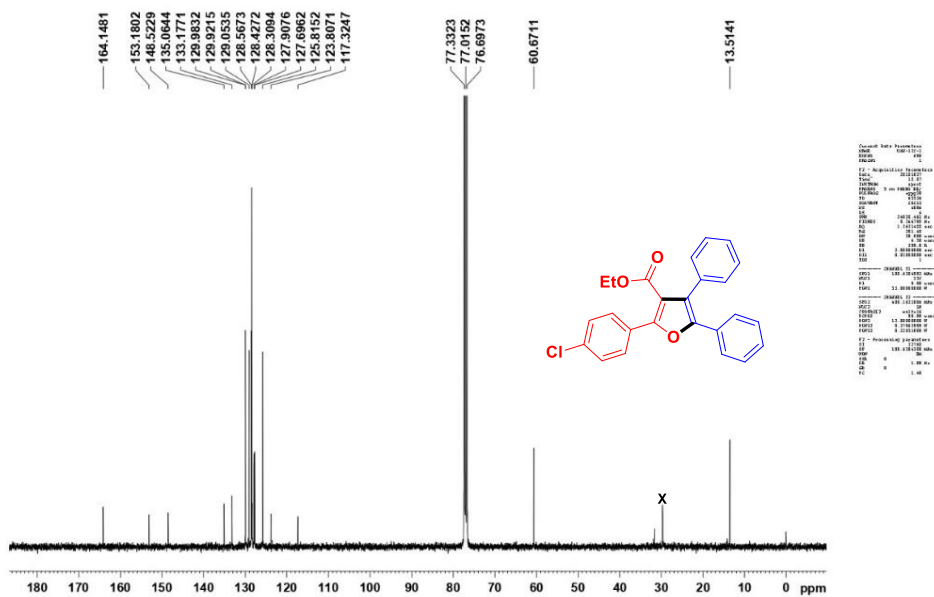

HRMS spectrum of compound-3ha

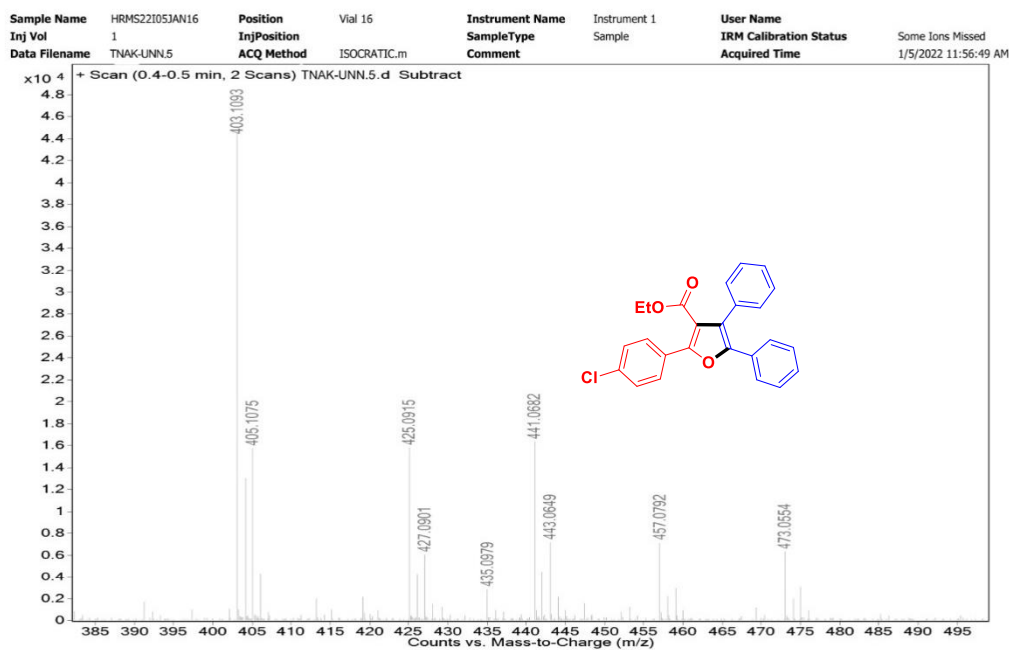

<sup>1</sup>H NMR spectrum of compound- 3hc (400 MHz, CDCl<sub>3</sub>)

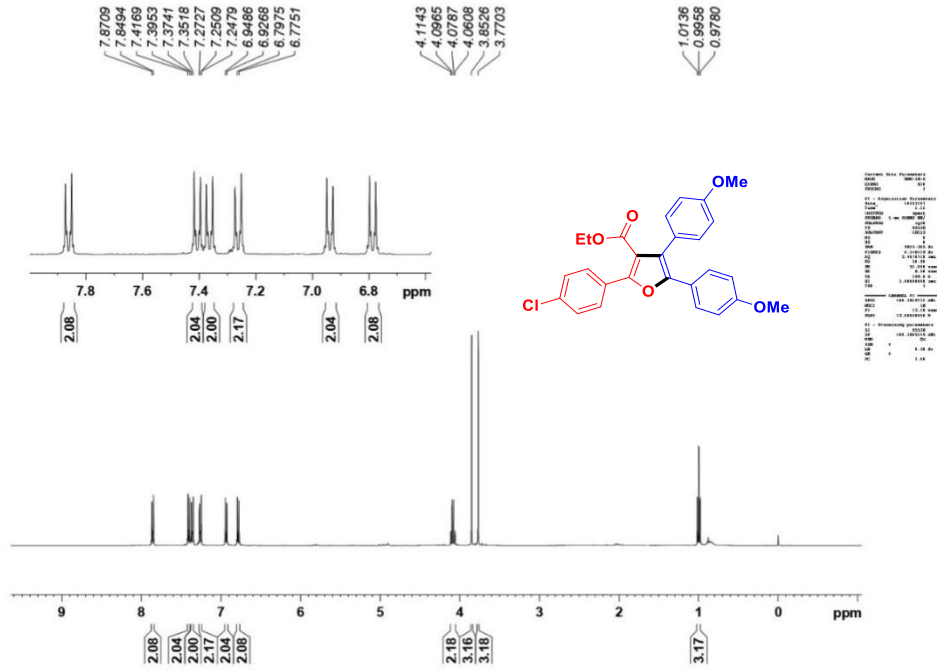

<sup>13</sup>C NMR spectrum of compound- 3hc (100 MHz, CDCl<sub>3</sub>)

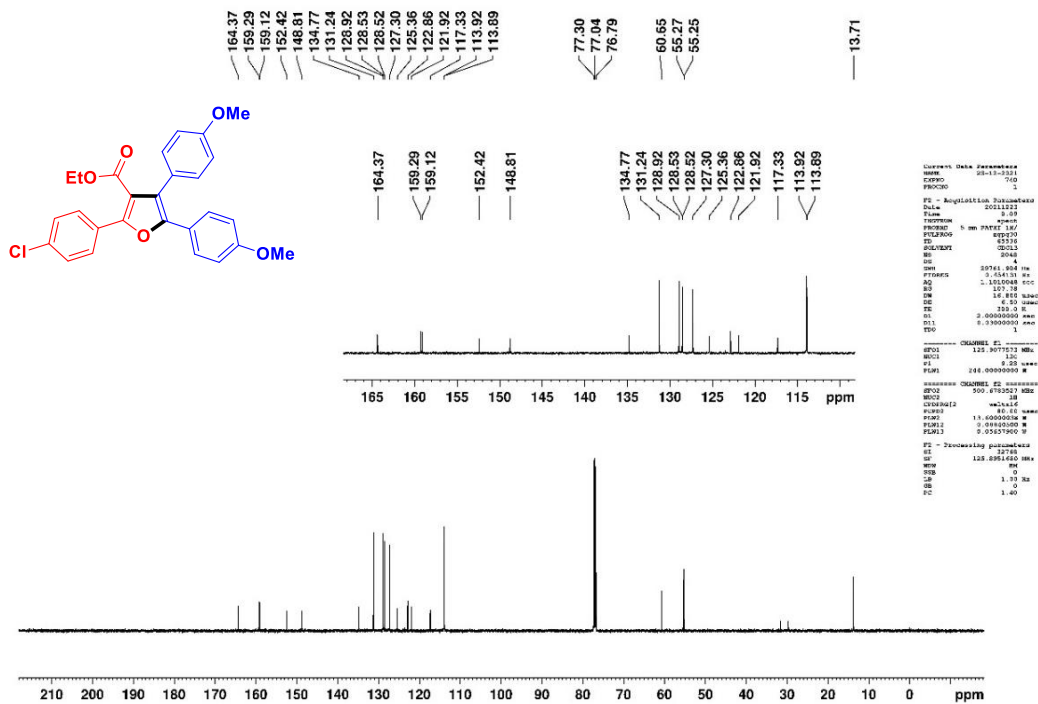



### HRMS spectrum of compound-3hc

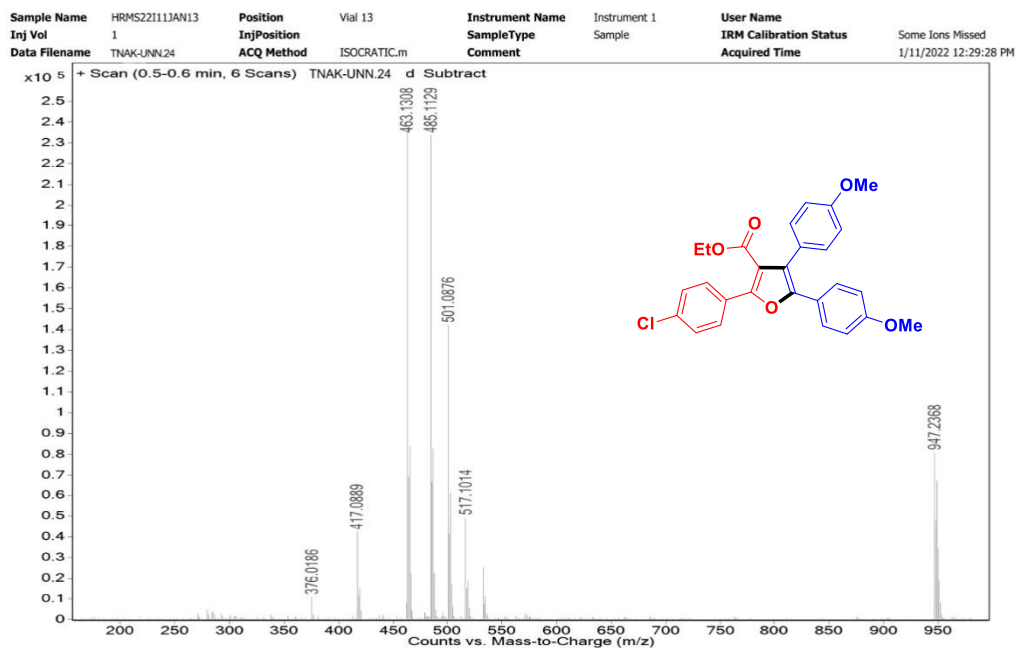

### <sup>1</sup>H NMR spectrum of compound- 3hd (400 MHz, CDCl<sub>3</sub>)

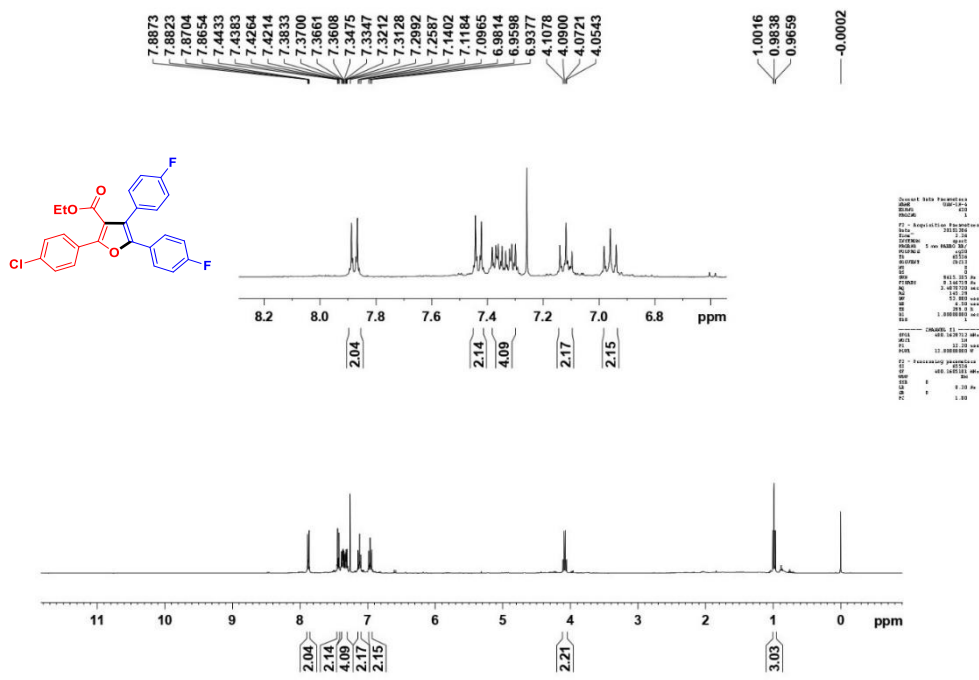

<sup>13</sup>C NMR spectrum of compound- 3hd (100 MHz, CDCl<sub>3</sub>); X= wax impurity

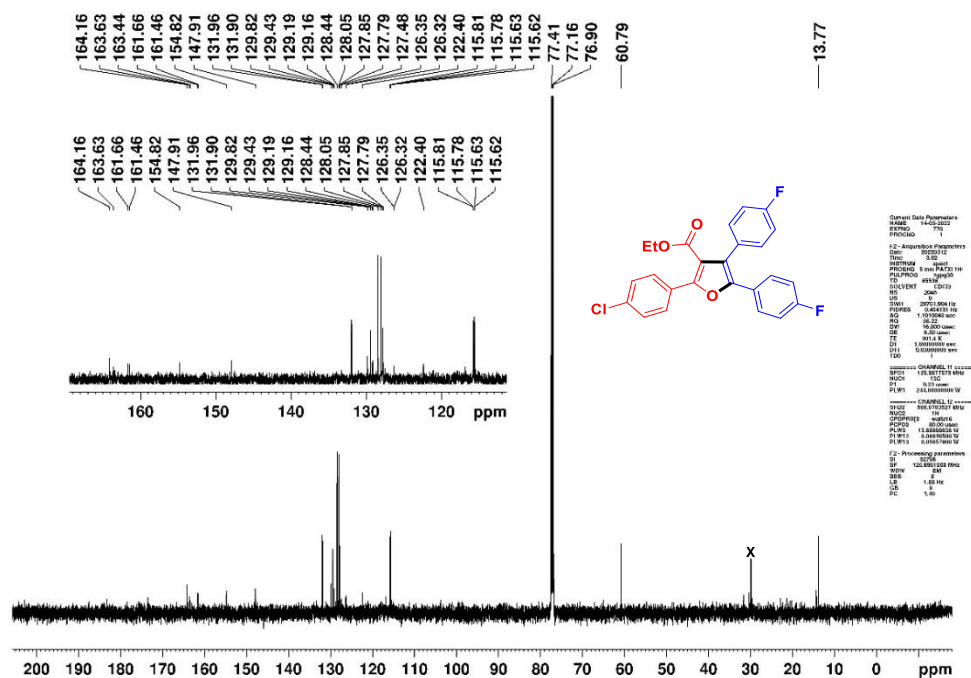

HRMS spectrum of compound-3hd

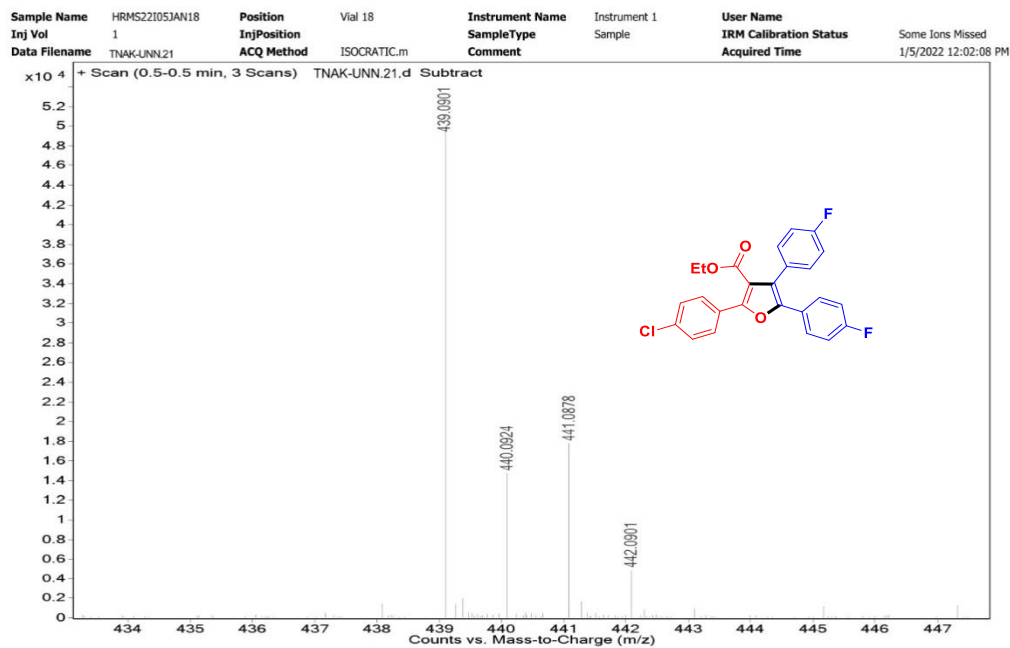

<sup>1</sup>H NMR spectrum of compound- 3ic (400 MHz, CDCl<sub>3</sub>); X= wax impurity

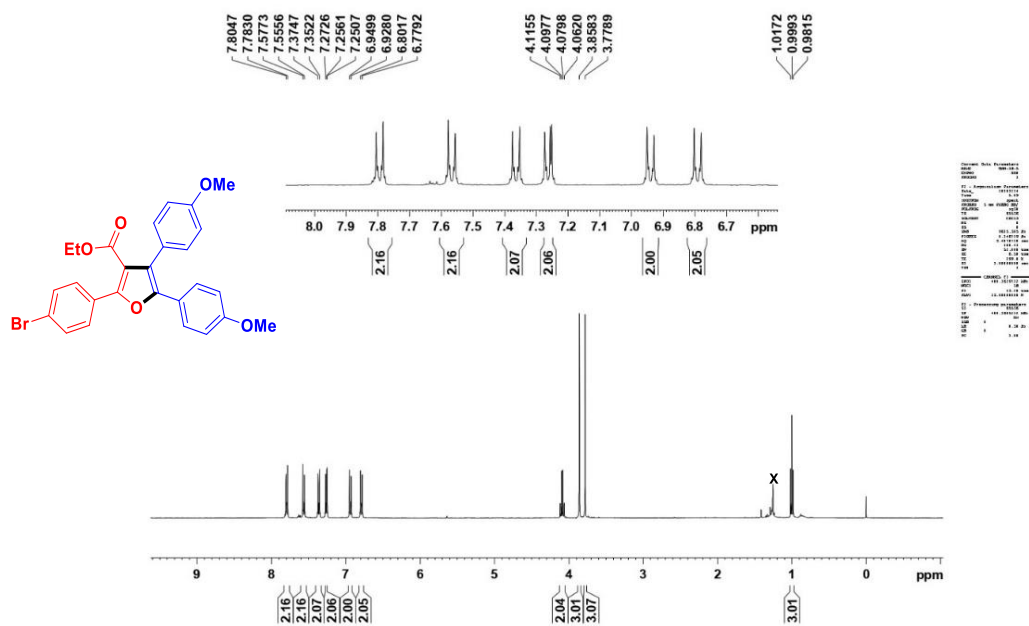

<sup>13</sup>C NMR spectrum of compound- 3ic (100 MHz, CDCl<sub>3</sub>)

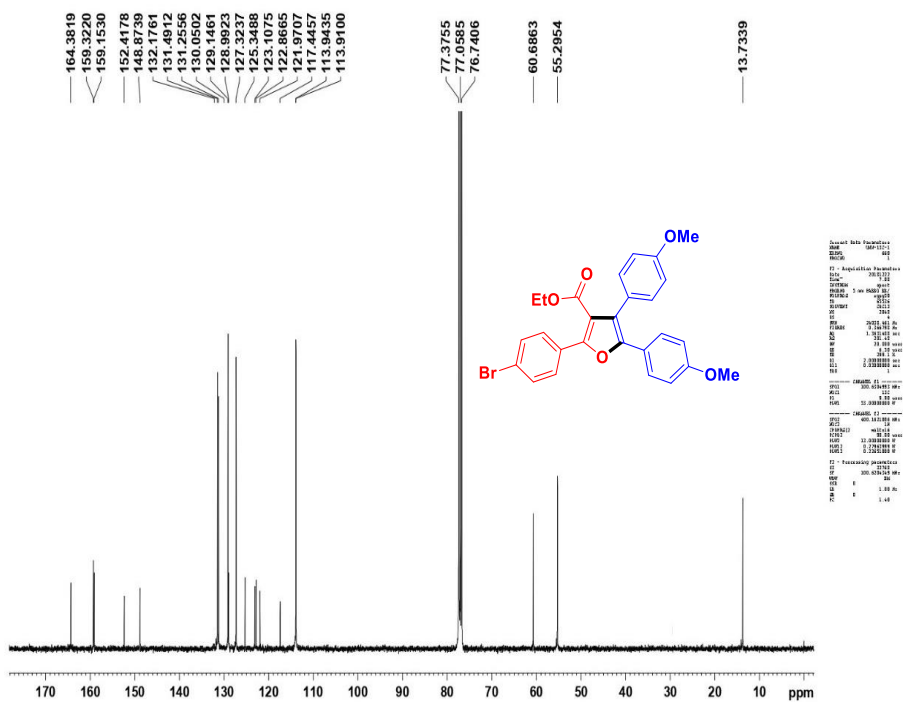

### HRMS spectrum of compound-3ic

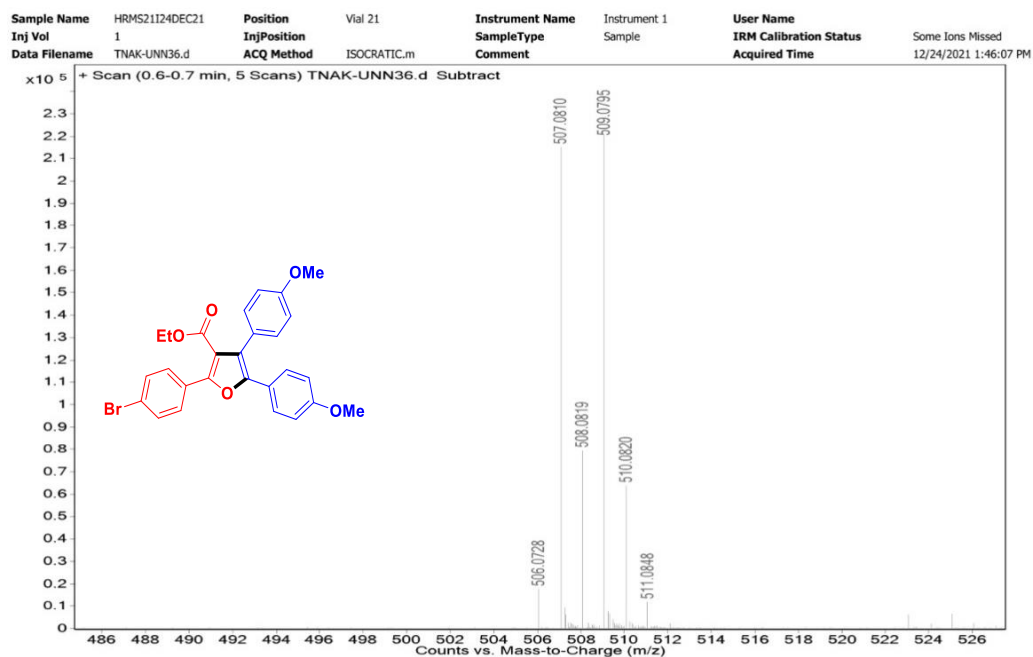

### <sup>1</sup>H NMR spectrum of compound- 3ja (400 MHz, CDCl<sub>3</sub>); X= wax impurity

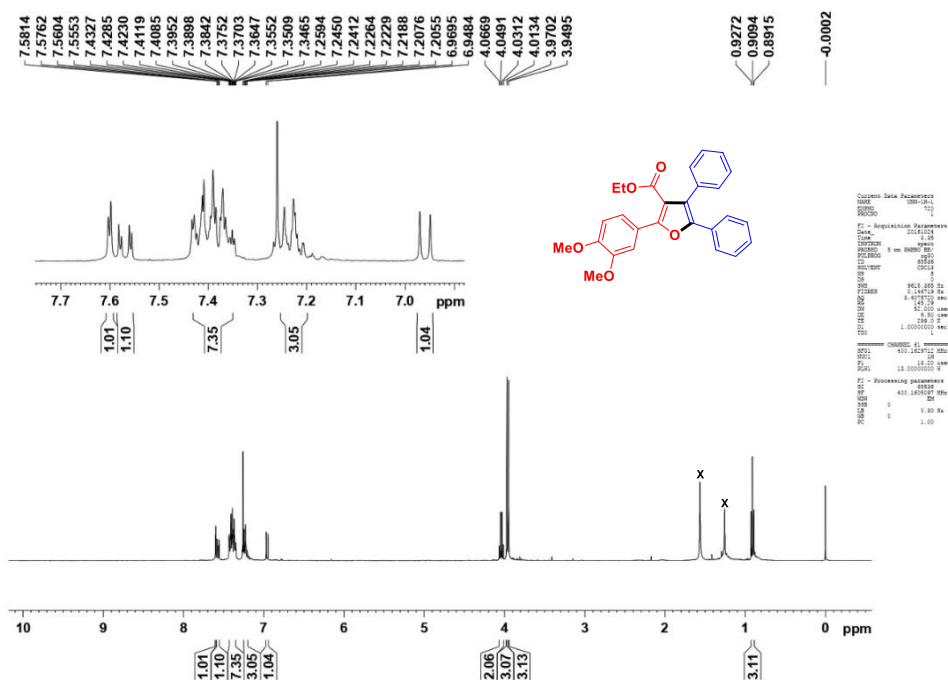

### <sup>13</sup>C NMR spectrum of compound- 3ja (100 MHz, CDCl<sub>3</sub>); X= wax impurity

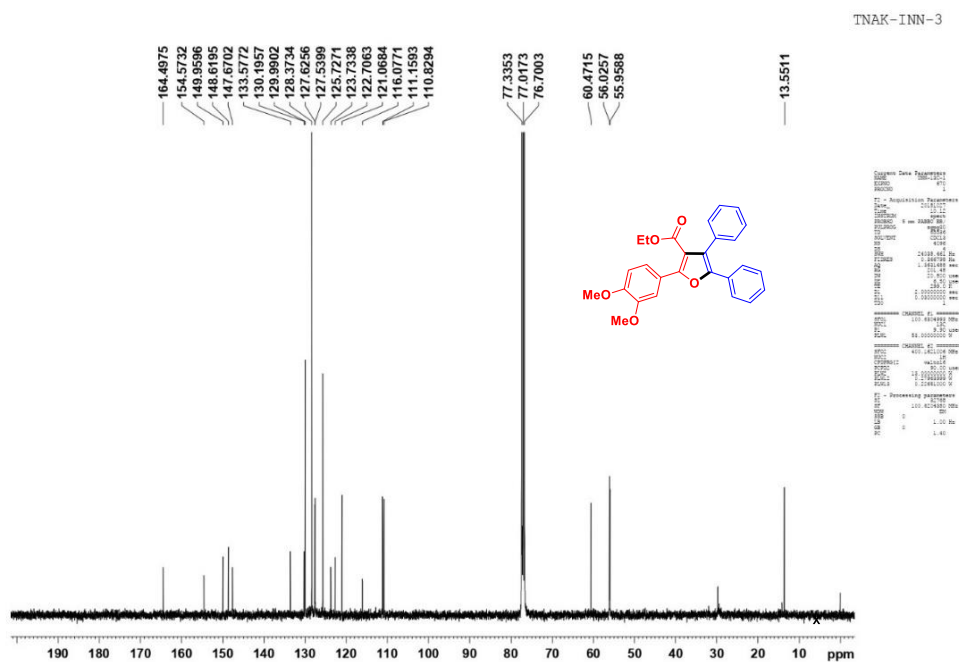

### HRMS spectrum of compound-3ja

| Sample Name   | HRMS21102DEC21 | Position    | Vial 21     | Instrument Name | Instrument 1 | User Name     | IRM Calibration Status | Some Ions Missed      |
|---------------|----------------|-------------|-------------|-----------------|--------------|---------------|------------------------|-----------------------|
| Inj Vol       | 1              | InjPosition |             | SampleType      | Sample       |               |                        |                       |
| Data Filename | TNAK-UNN-3.d   | ACQ Method  | ISOCRATIC.m | Comment         |              | Acquired Time |                        | 12/2/2021 12:26:49 PM |

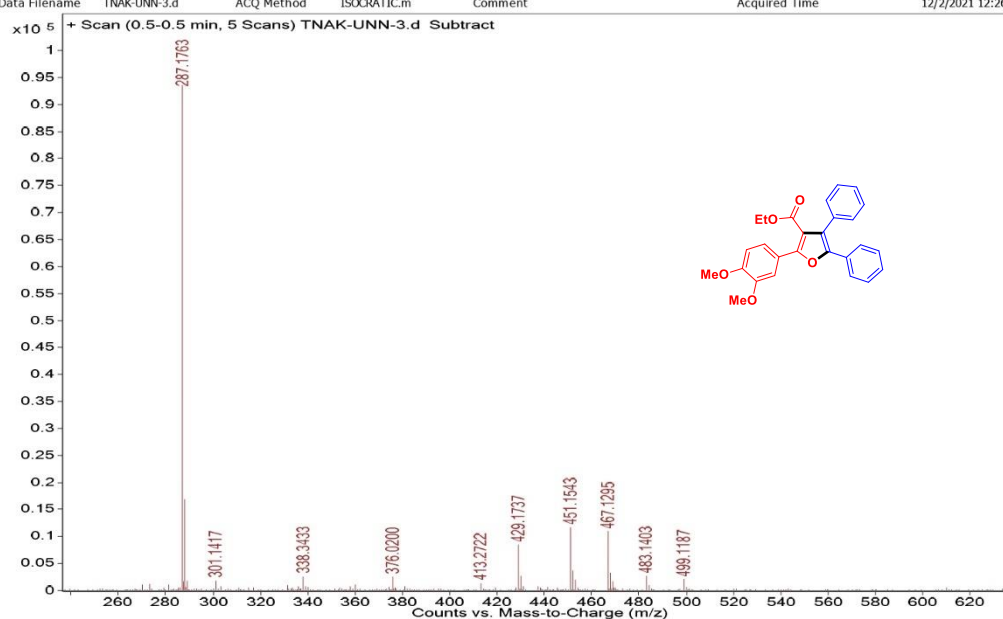

<sup>1</sup>H NMR spectrum of compound- 3jb (400 MHz, CDCl<sub>3</sub>);

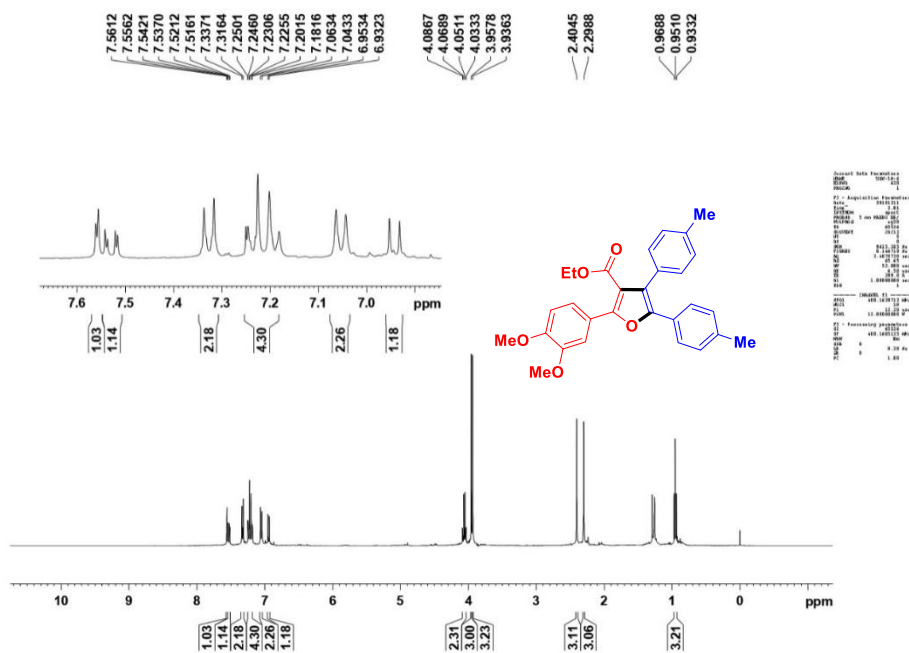

<sup>13</sup>C NMR spectrum of compound- 3jb (100 MHz, CDCl<sub>3</sub>); X= wax impurity

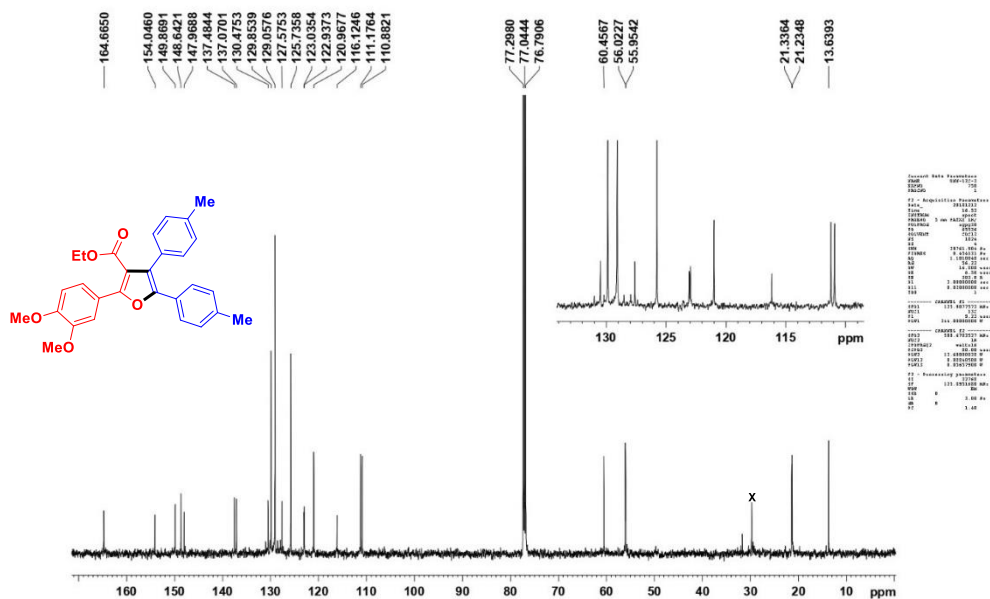

### HRMS spectrum of compound-3jb

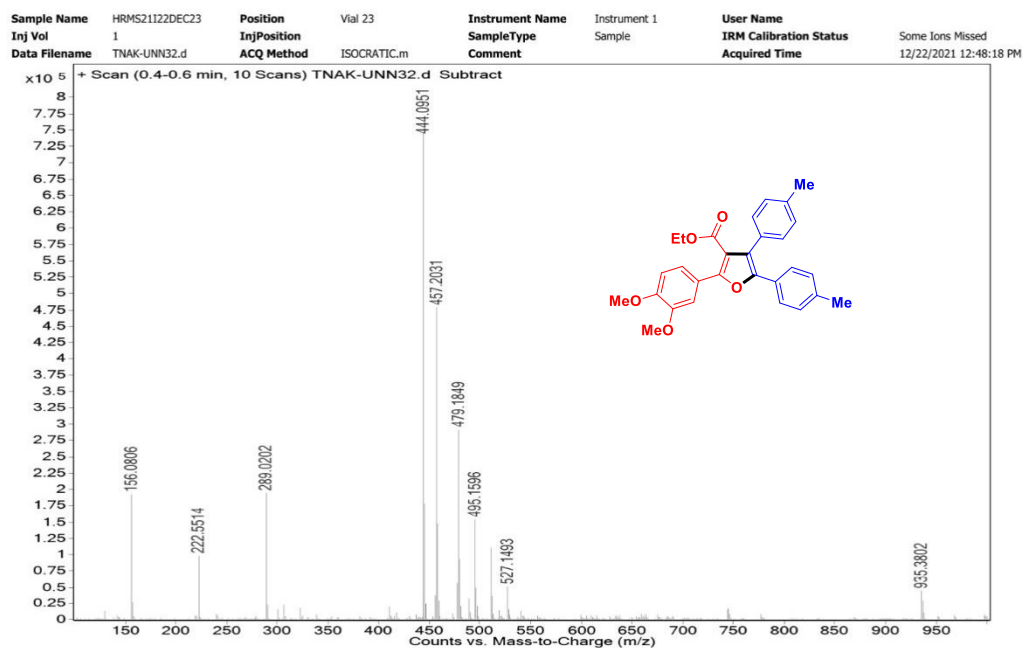

### <sup>1</sup>H NMR spectrum of compound- 3jc (400 MHz, CDCl<sub>3</sub>); X= wax impurity, Y = H<sub>2</sub>O

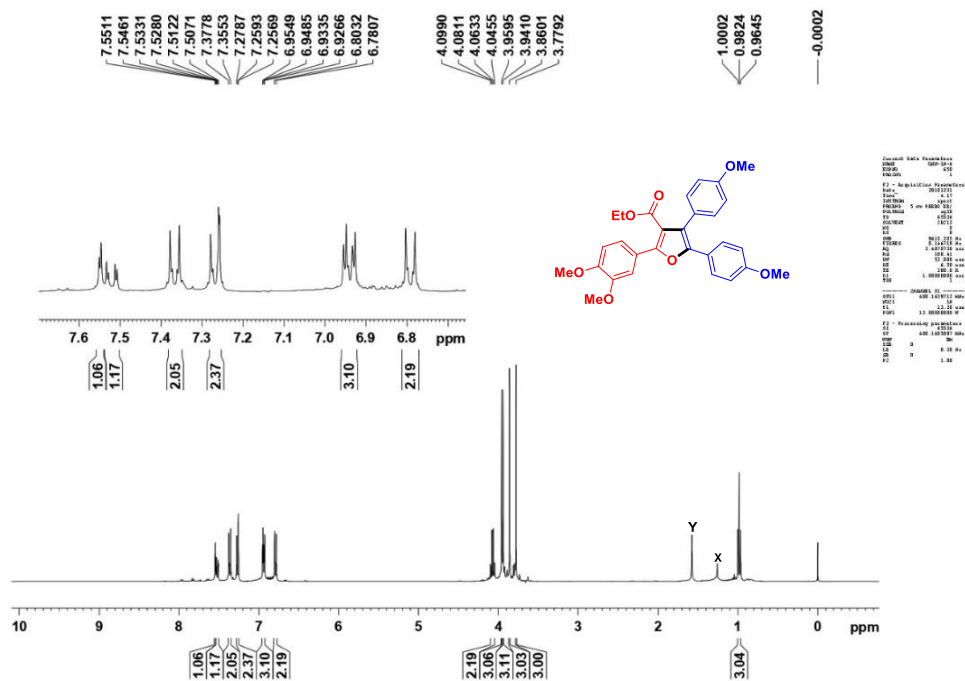

<sup>13</sup>C NMR spectrum of compound- 3jc (100 MHz, CDCl<sub>3</sub>); X= wax impurity

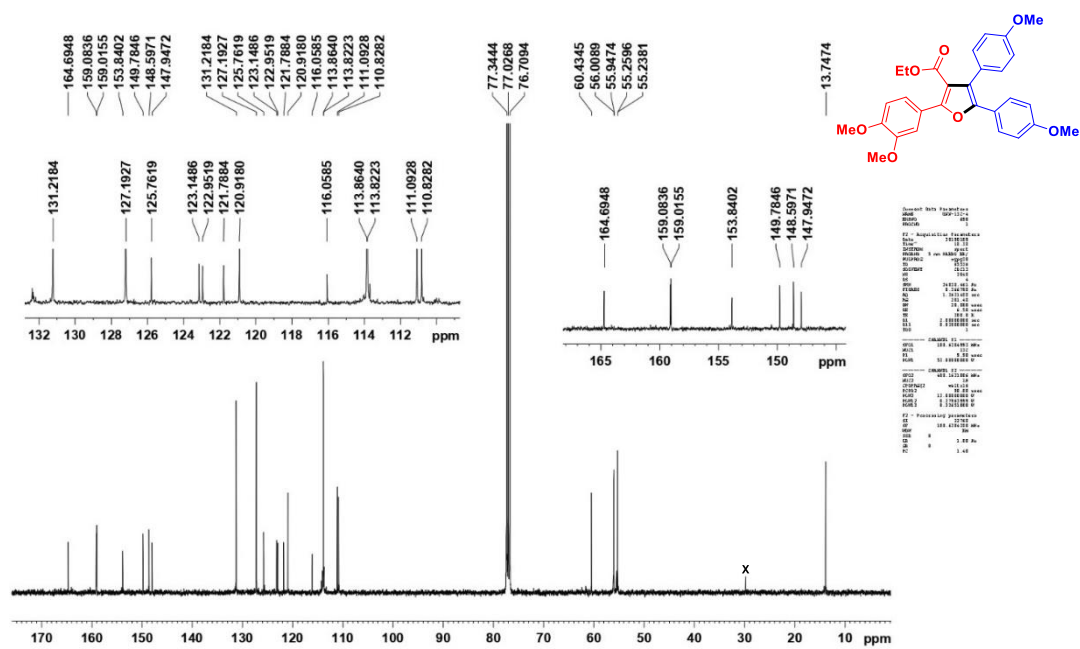

HRMS spectrum of compound-3jc

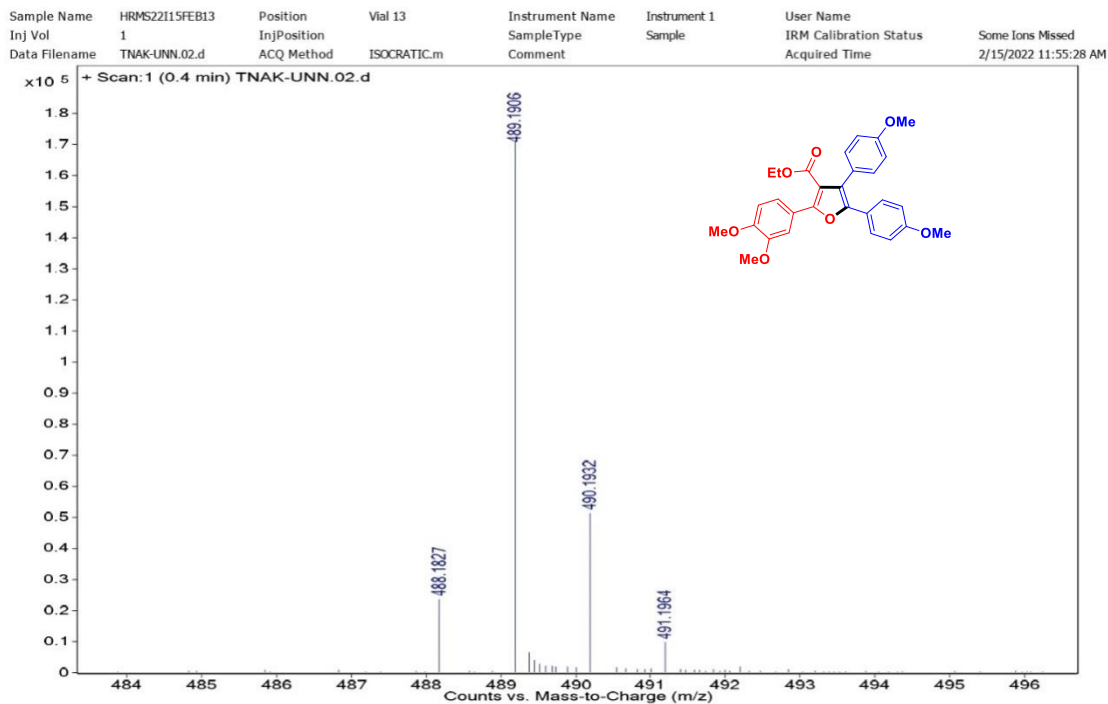



<sup>1</sup>H NMR spectrum of compound- 3jd (400 MHz, CDCl<sub>3</sub>); X= wax impurity

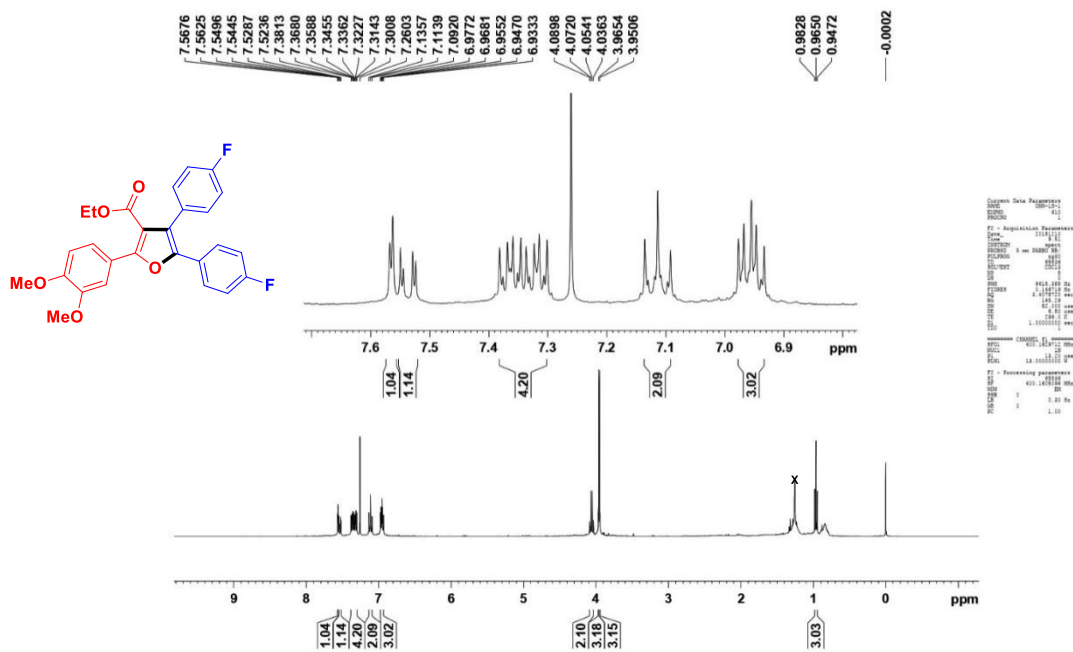

<sup>13</sup>C NMR spectrum of compound- 3jd (100 MHz, CDCl<sub>3</sub>)

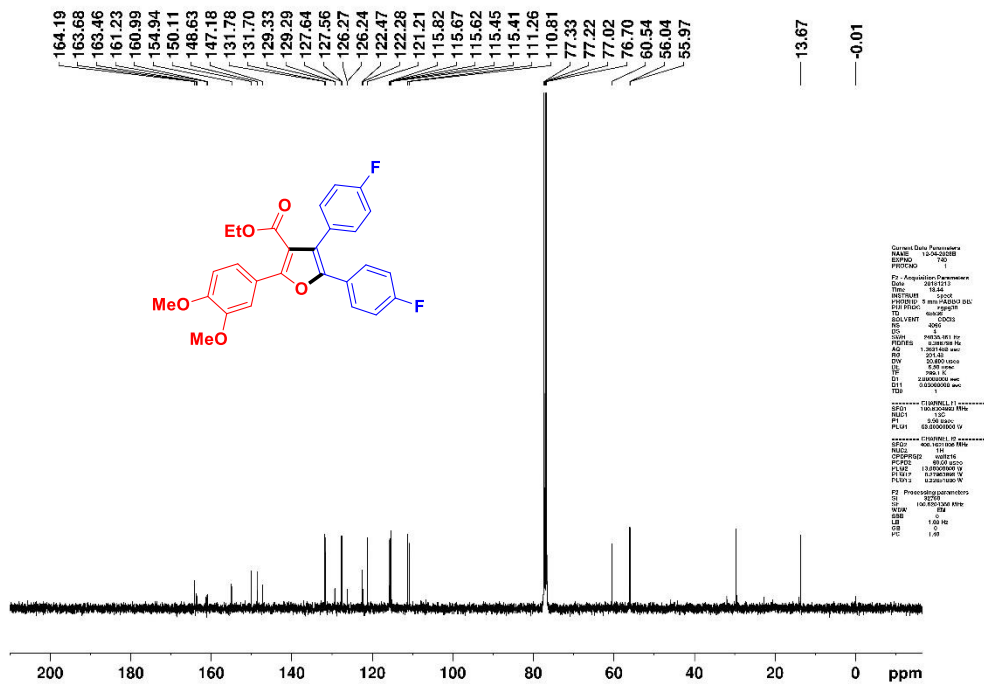

## HRMS spectrum of compound-3jd

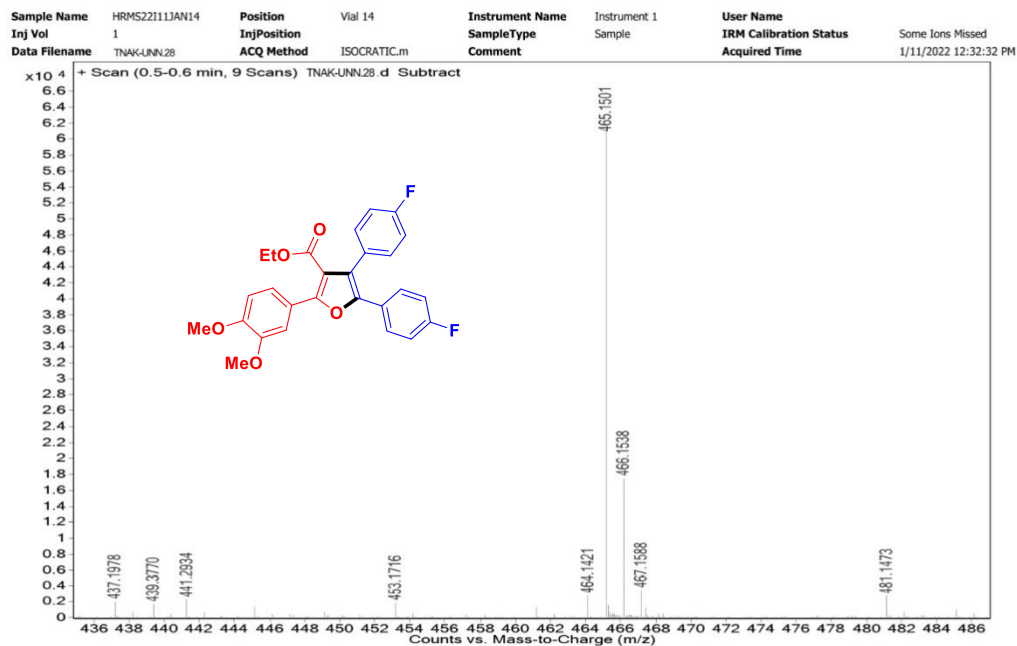

## <sup>1</sup>H NMR spectrum of compound- 3jf (400 MHz, CDCl<sub>3</sub>); X= wax impurity

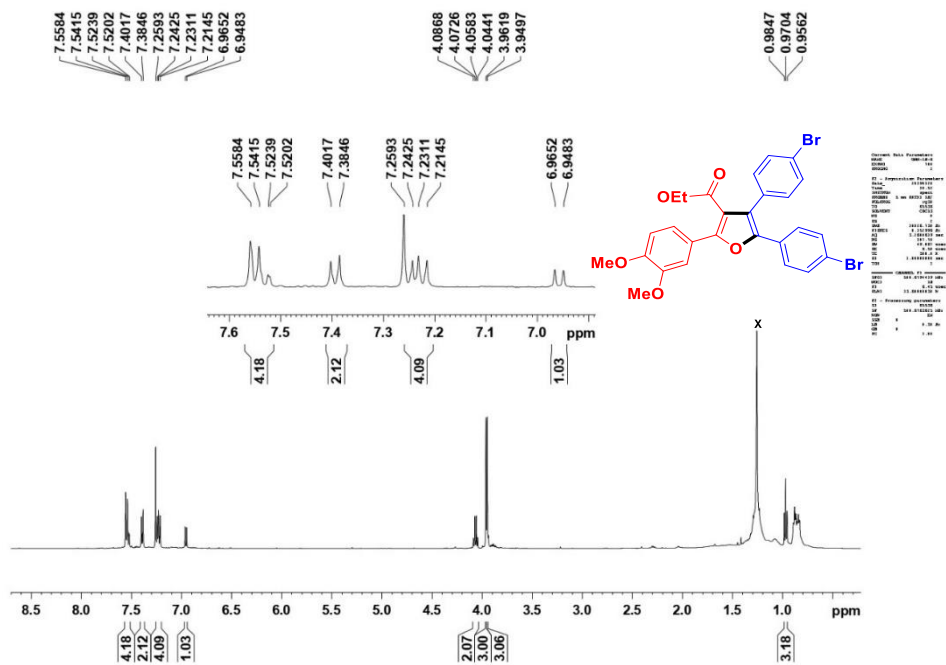

<sup>13</sup>C NMR spectrum of compound- 3jf (100 MHz, CDCl<sub>3</sub>); X= wax impurity

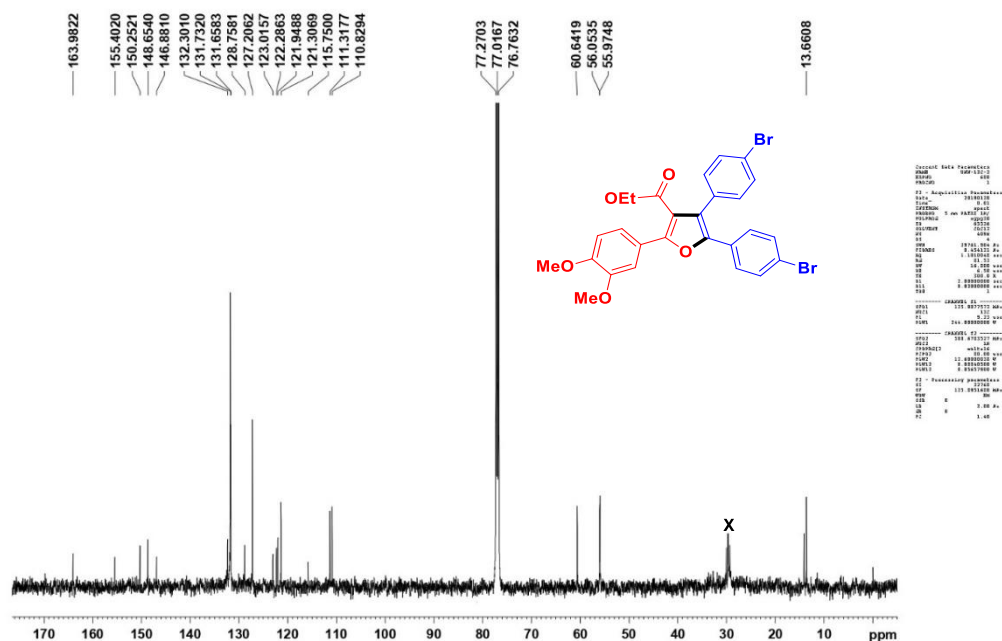

HRMS spectrum of compound-3jf

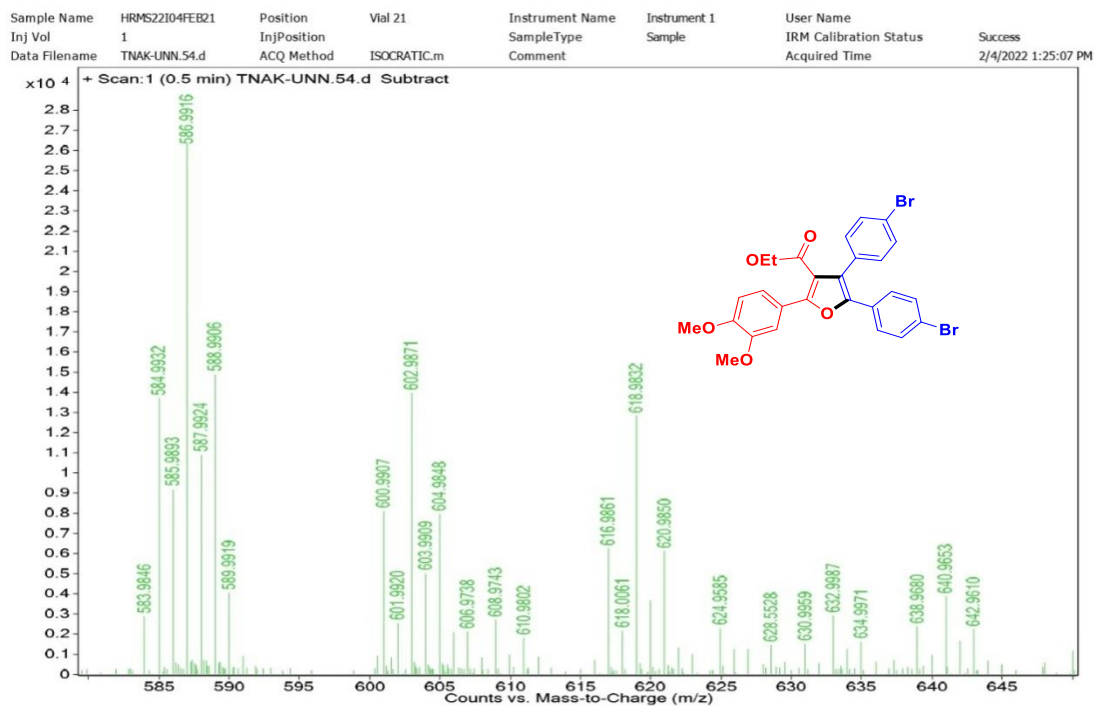

<sup>1</sup>H NMR spectrum of compound- 3ka (400 MHz, CDCl<sub>3</sub>)

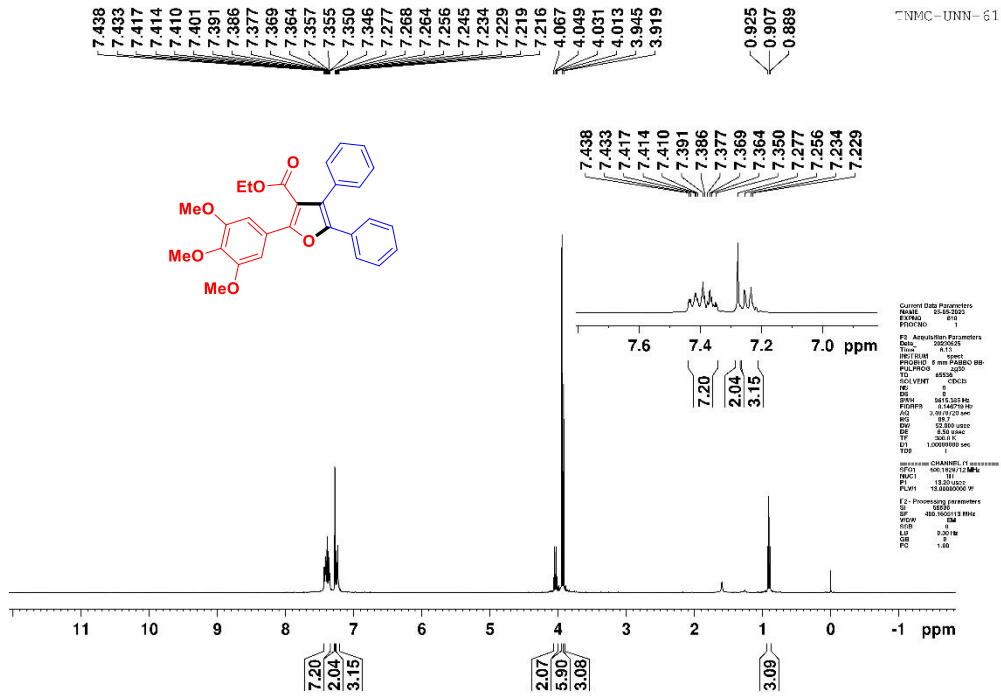

<sup>13</sup>C NMR spectrum of compound- 3ka (100 MHz, CDCl<sub>3</sub>);

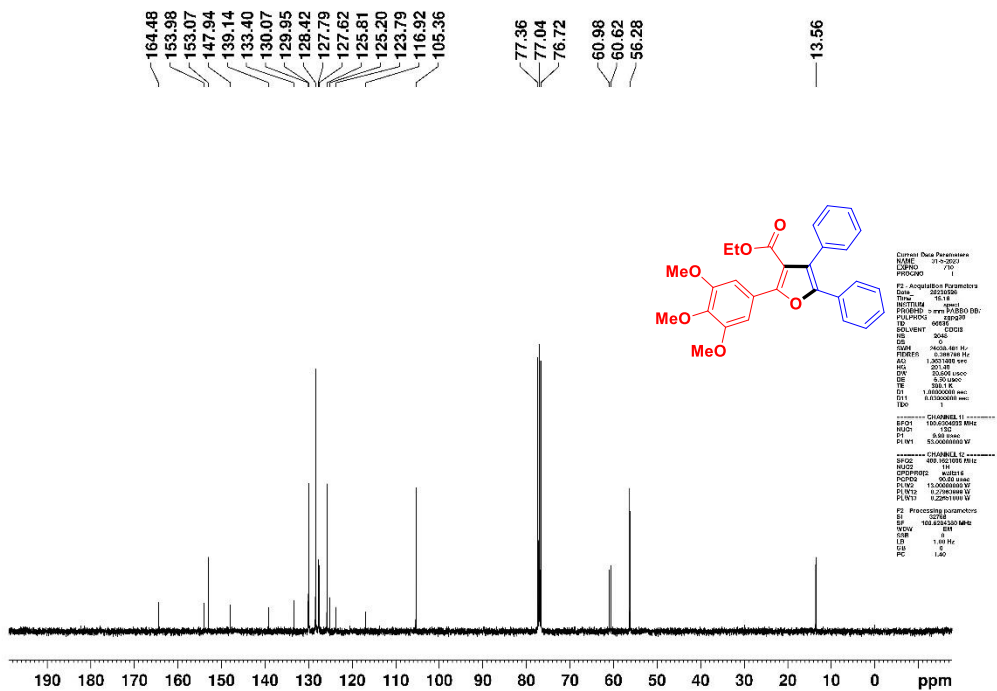

### HRMS spectrum of compound-3ka

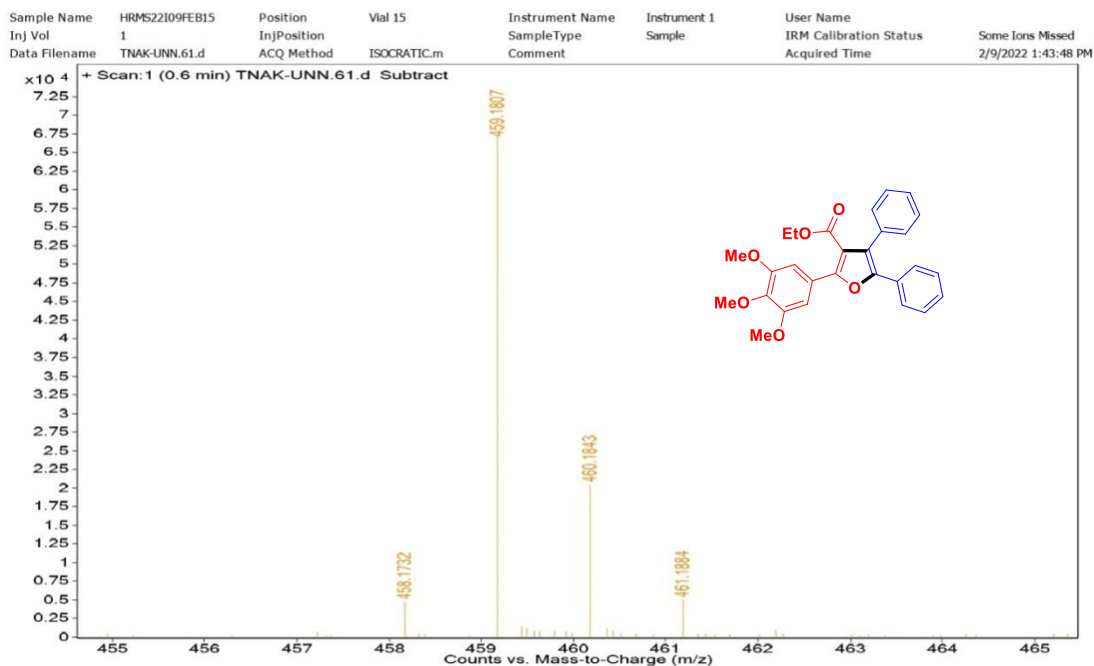

### <sup>1</sup>H NMR spectrum of compound- 3kb (400 MHz, CDCl<sub>3</sub>); Y=H<sub>2</sub>O impurity

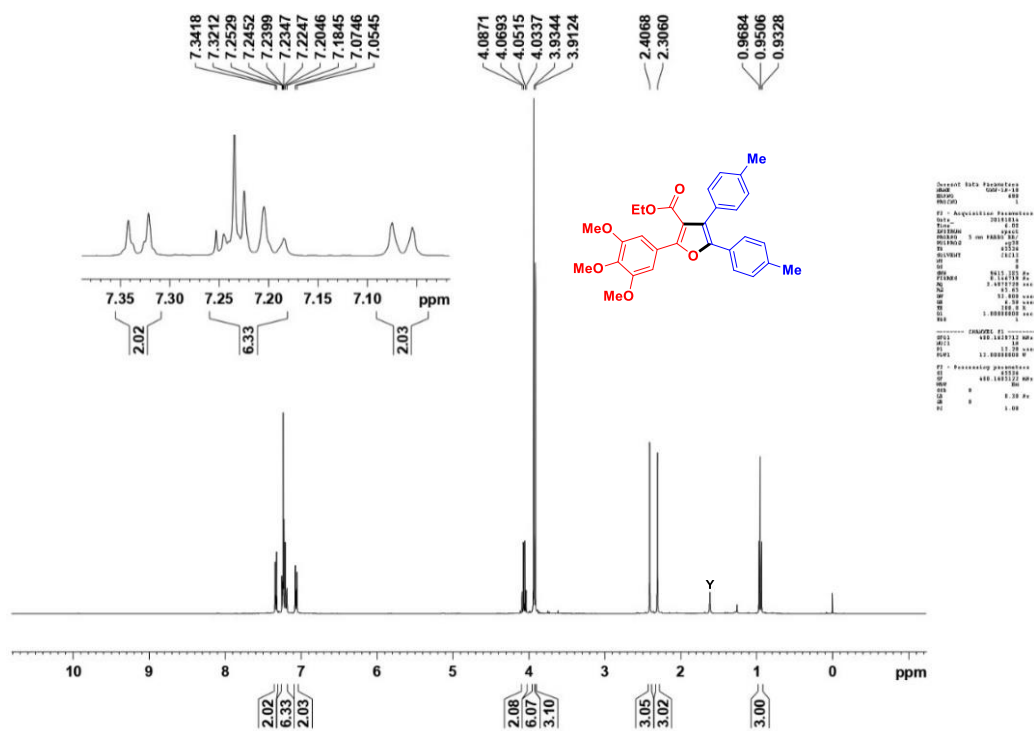

### <sup>13</sup>C NMR spectrum of compound- 3kb (100 MHz, CDCl<sub>3</sub>)

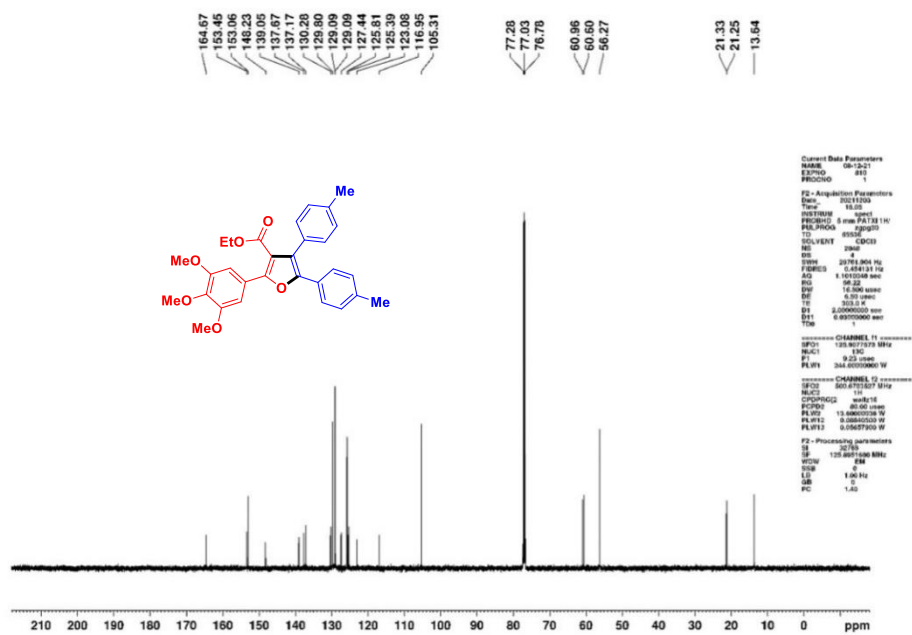

### HRMS spectrum of compound-3kb

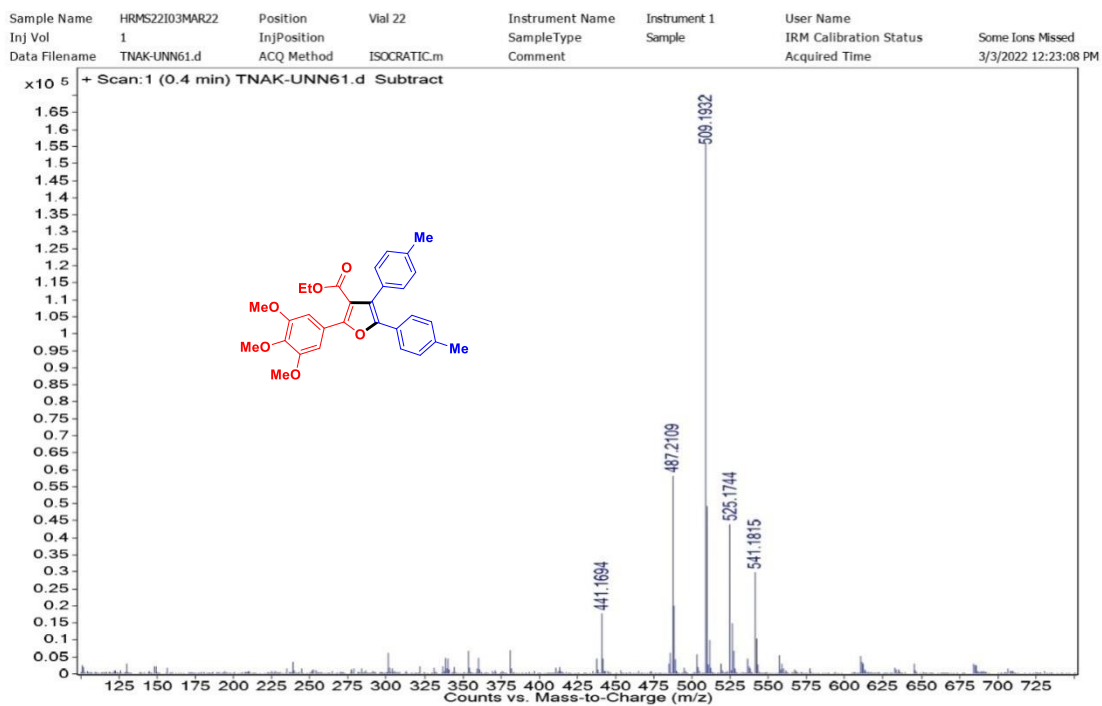

<sup>1</sup>H NMR spectrum of compound- 3kd (400 MHz, CDCl<sub>3</sub>); Y=H<sub>2</sub>O impurity

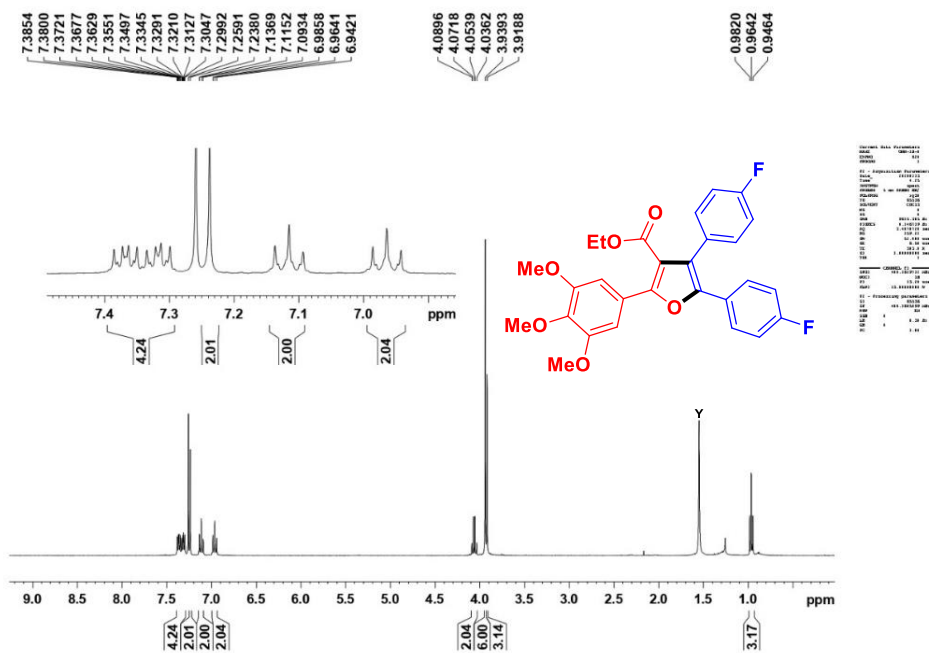

<sup>13</sup>C NMR spectrum of compound- 3kd (100 MHz, CDCl<sub>3</sub>)

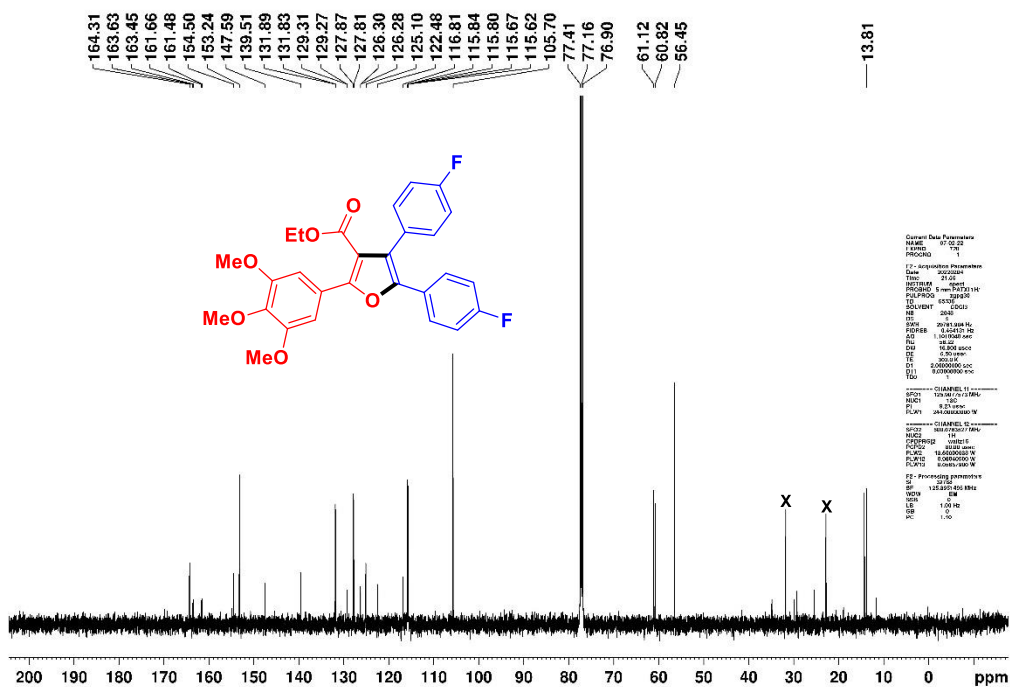

### HRMS spectrum of compound-3kd

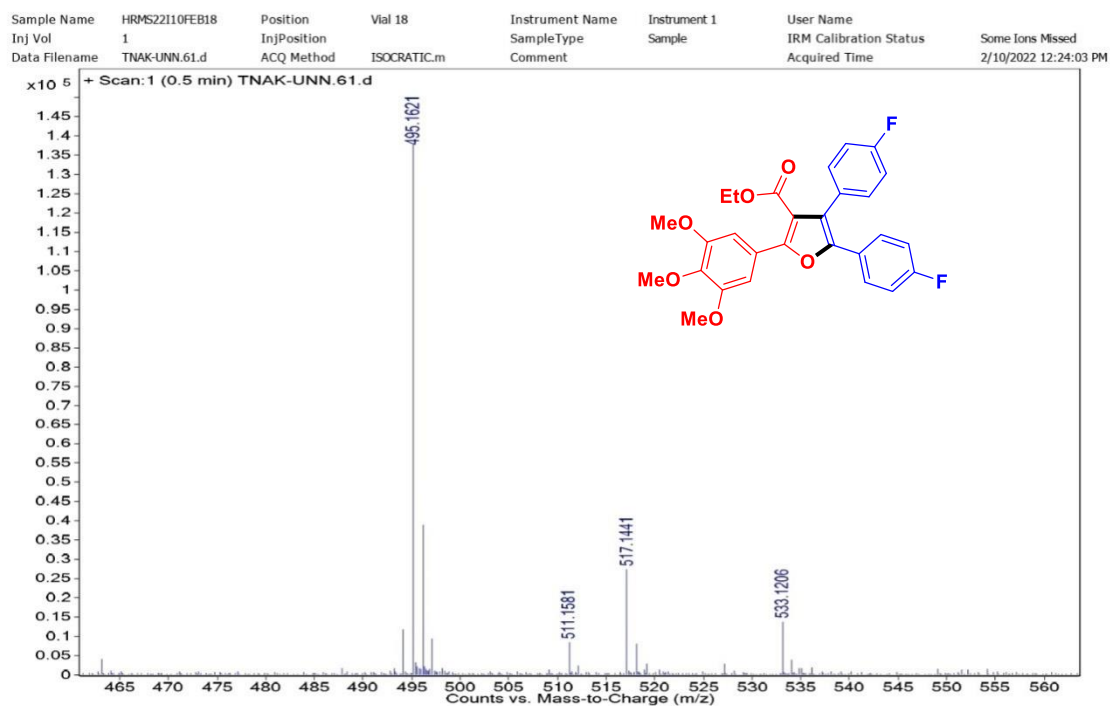

### <sup>1</sup>H NMR spectrum of compound- 3ag (400 MHz, CDCl<sub>3</sub>);

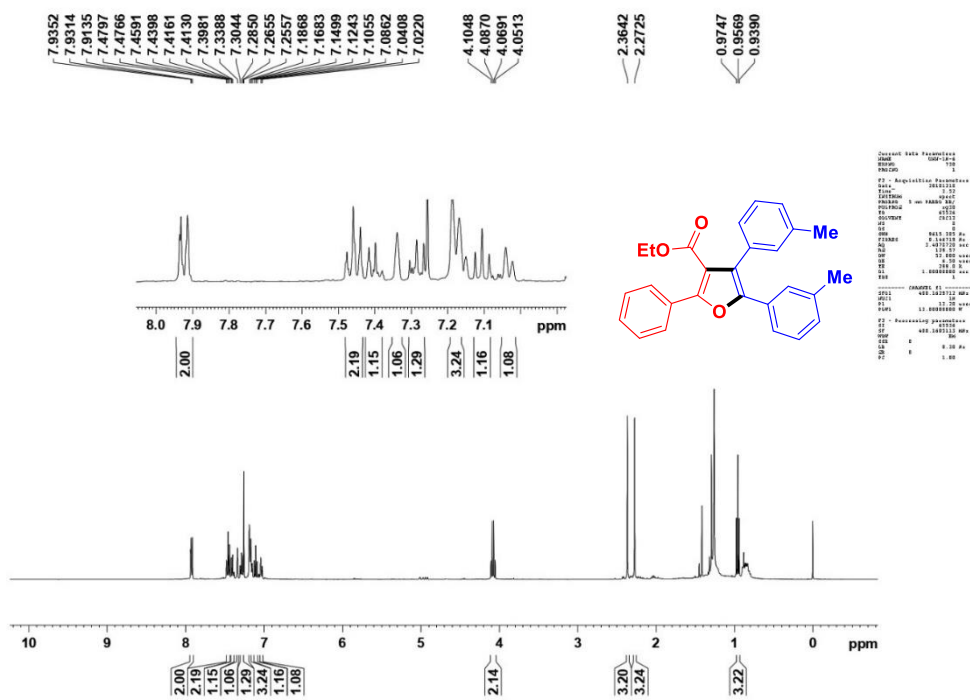



**<sup>13</sup>C NMR spectrum of compound- 3ag (100 MHz, CDCl<sub>3</sub>)**

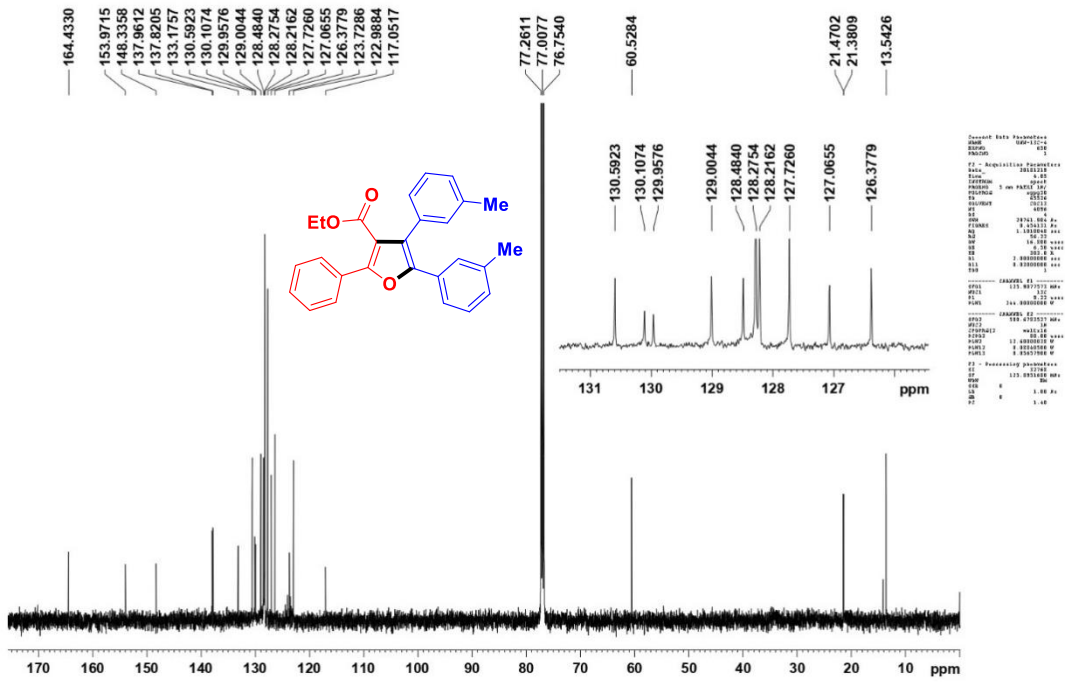

**HRMS spectrum of compound-3ag**

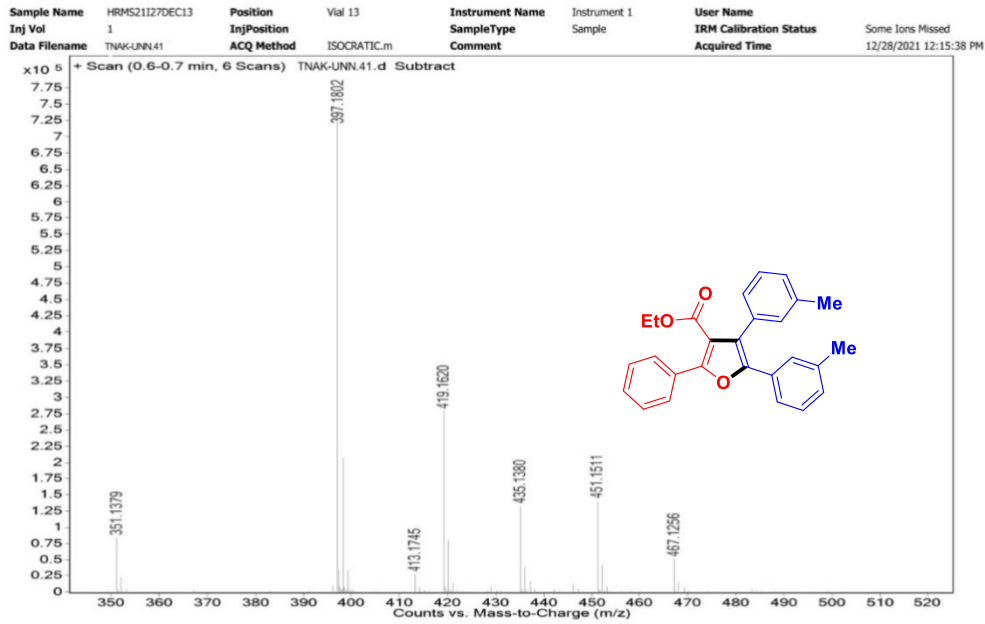

**$^1\text{H}$  NMR spectrum of compound- 3gg (400 MHz,  $\text{CDCl}_3$ )**

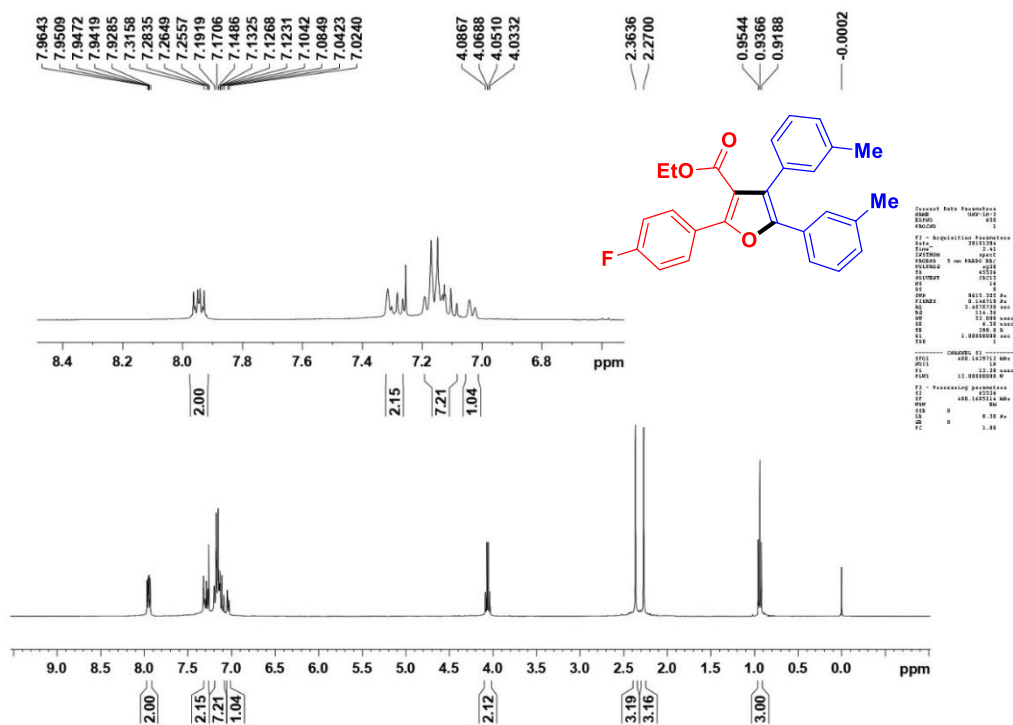

**$^{13}\text{C}$  NMR spectrum of compound- 3gg (100 MHz,  $\text{CDCl}_3$ )**

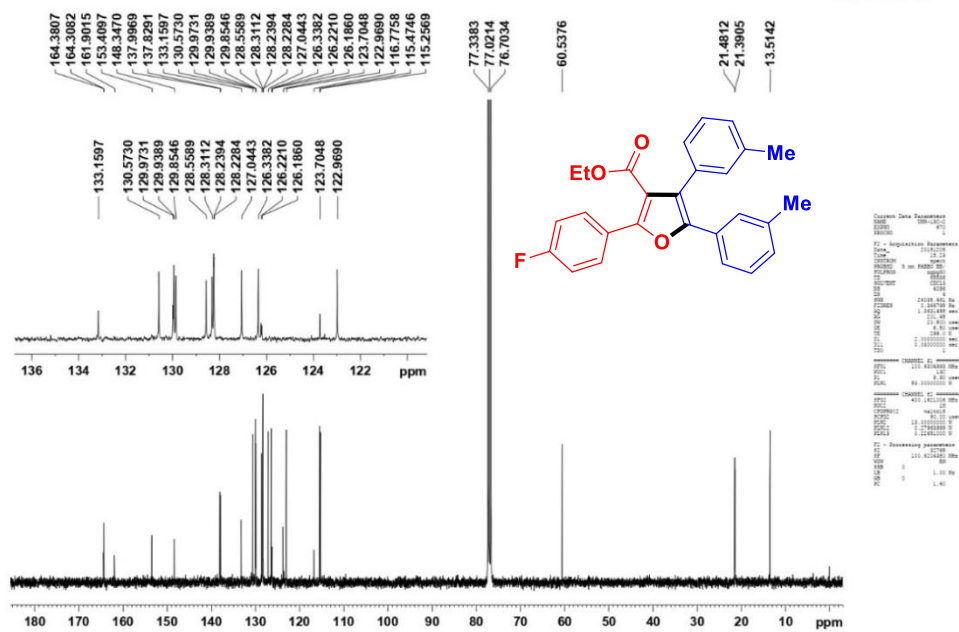

### HRMS spectrum of compound-3gg

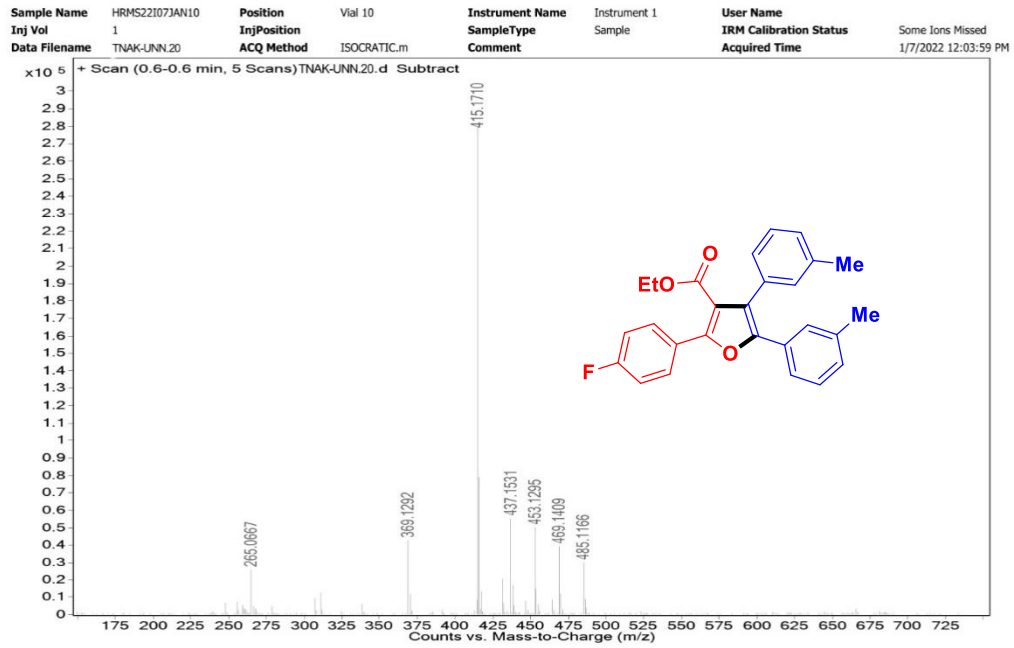

### <sup>1</sup>H NMR spectrum of compound- 3hg (400 MHz, CDCl<sub>3</sub>)

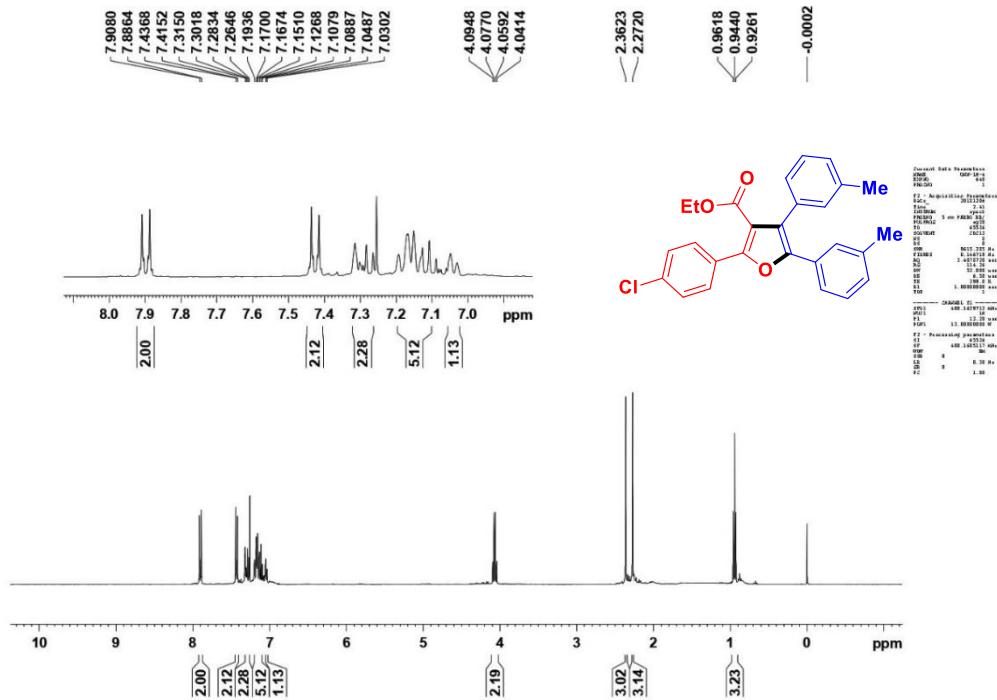

<sup>13</sup>C NMR spectrum of compound- 3hg (100 MHz, CDCl<sub>3</sub>)

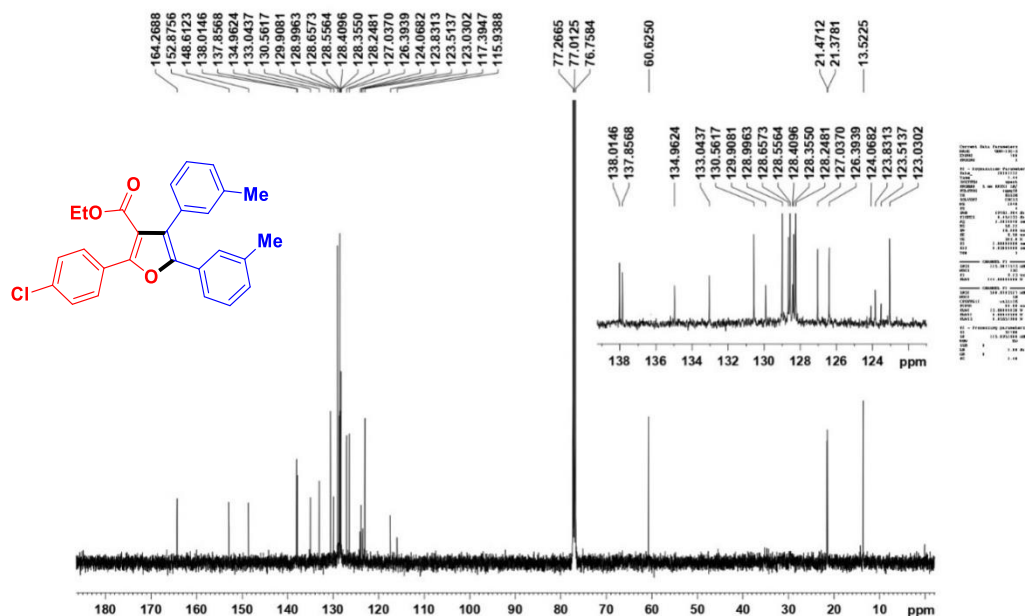

HRMS spectrum of compound-3hg

| Sample Name   | HRMS22106JAN21 | Position    | Vial 21     | Instrument Name | Instrument 1 | User Name              |                      |
|---------------|----------------|-------------|-------------|-----------------|--------------|------------------------|----------------------|
| Inj Vol       | 1              | InjPosition |             | SampleType      | Sample       | IRM Calibration Status | Some Ions Missed     |
| Data Filename | TNAK-UNN.22    | ACQ Method  | ISOCRATIC.m | Comment         |              | Acquired Time          | 1/6/2022 12:30:35 PM |

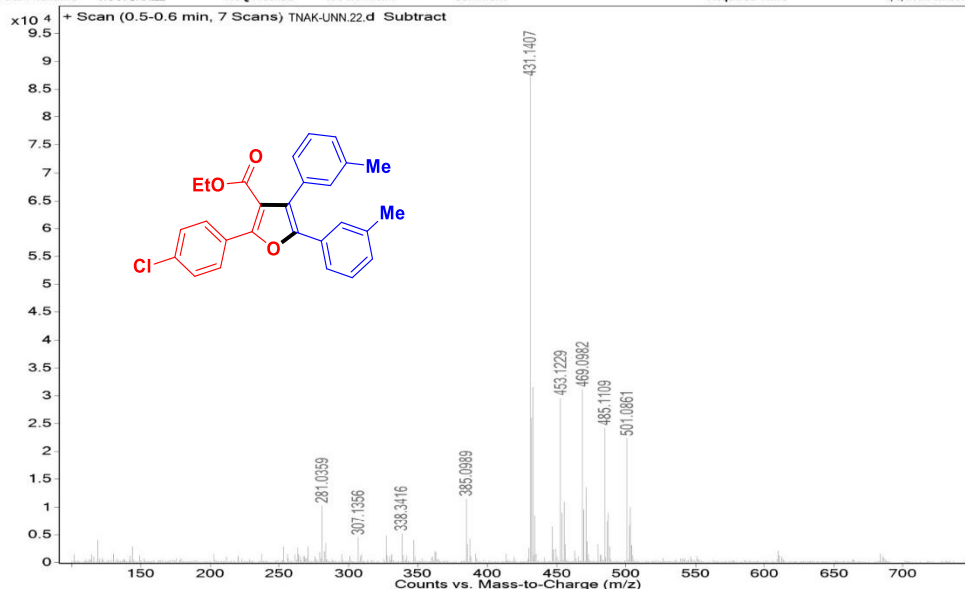

<sup>1</sup>H NMR spectrum of compound- 3gh (400 MHz, CDCl<sub>3</sub>)

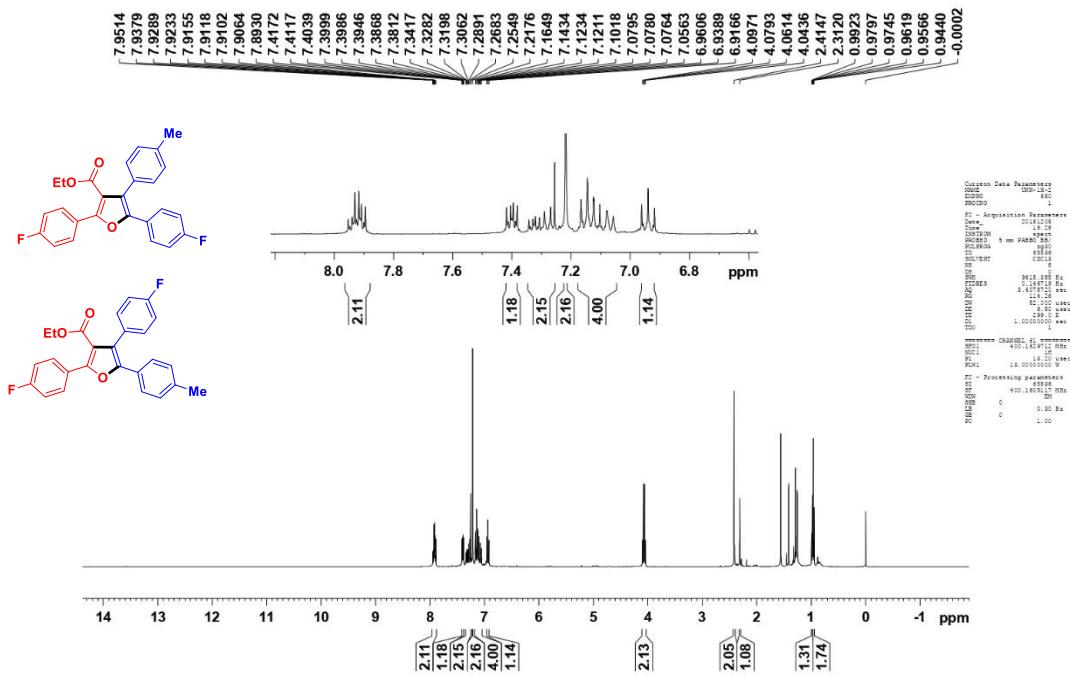

<sup>13</sup>C NMR spectrum of compound- 3gh (100 MHz, CDCl<sub>3</sub>)

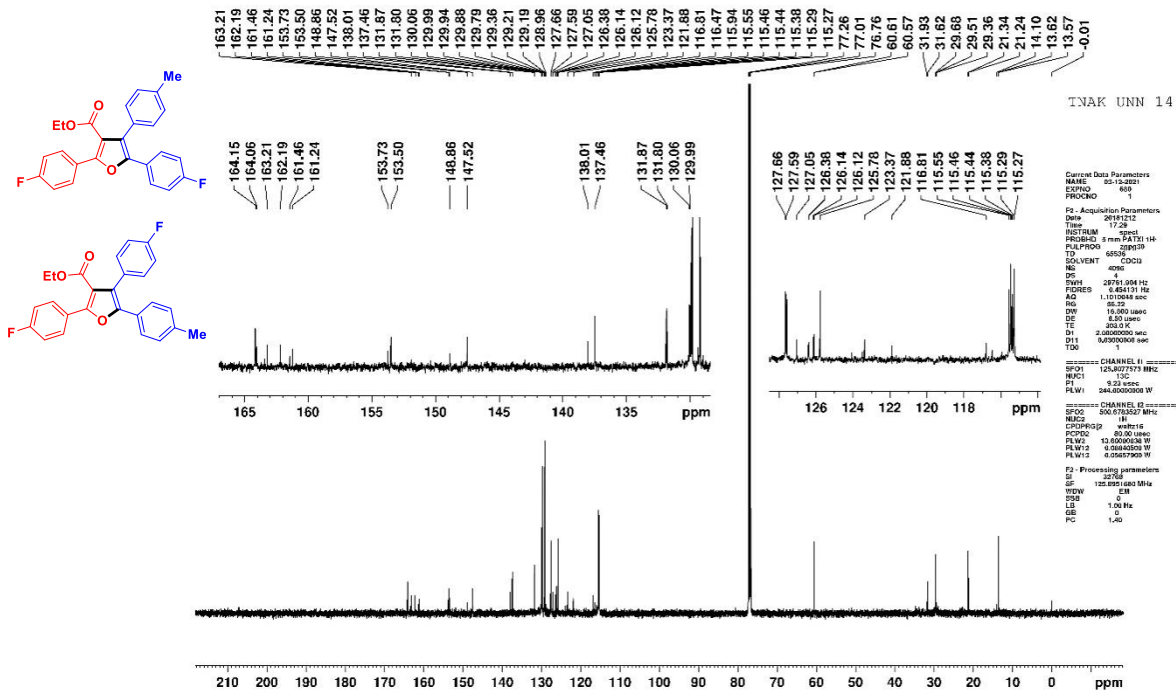

## HRMS spectrum of compound-3gh

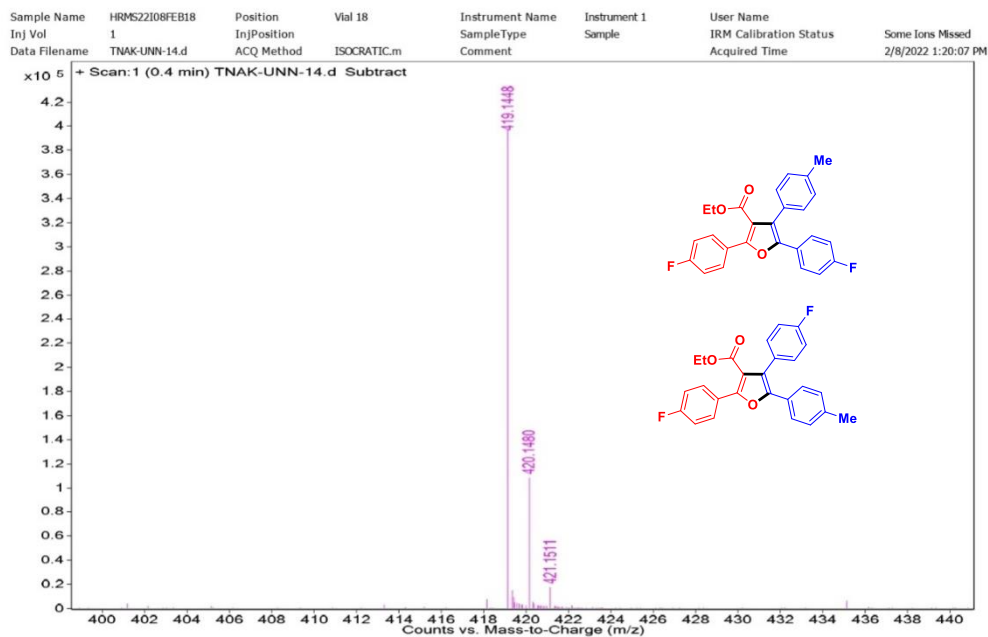

## <sup>1</sup>H NMR spectrum of compound- 3ki (400 MHz, CDCl<sub>3</sub>); Y=H<sub>2</sub>O impurity

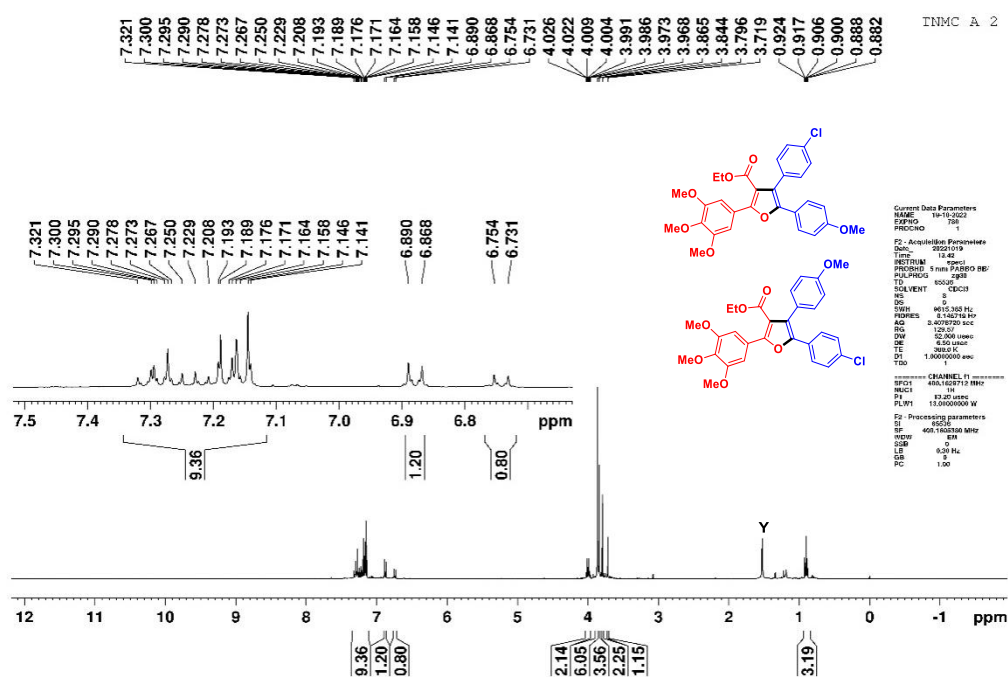

<sup>13</sup>C NMR spectrum of compound- 3ki (100 MHz, CDCl<sub>3</sub>)

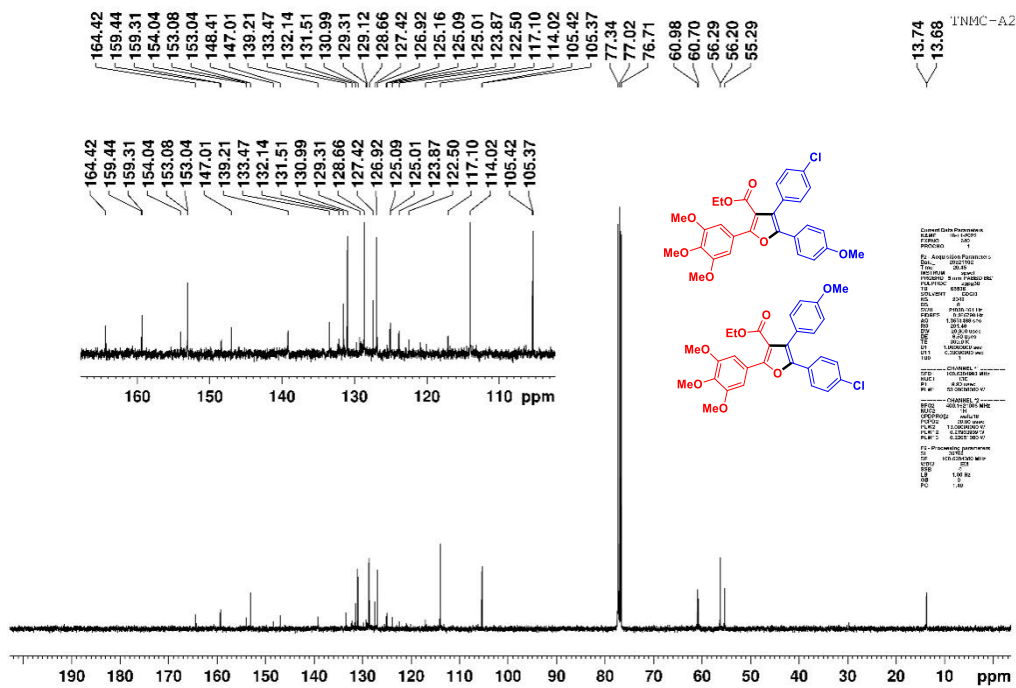

Cosy spectrum of compound – 3ki

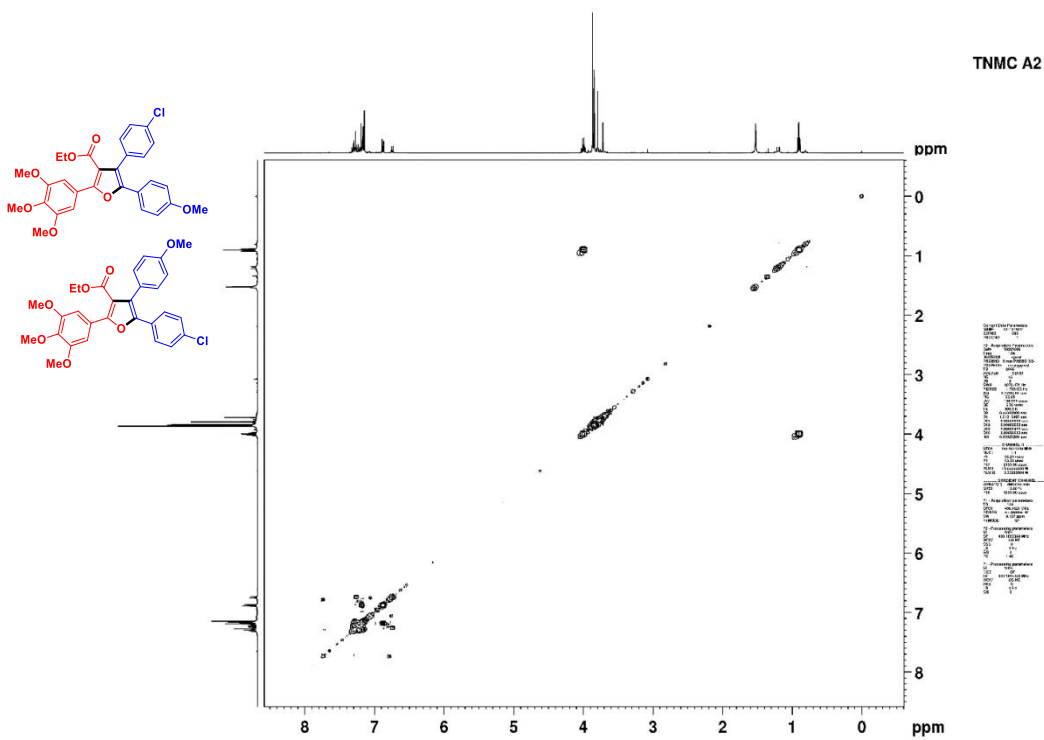

### HMBC SPECTRUM OF COMPOUND – 3ki

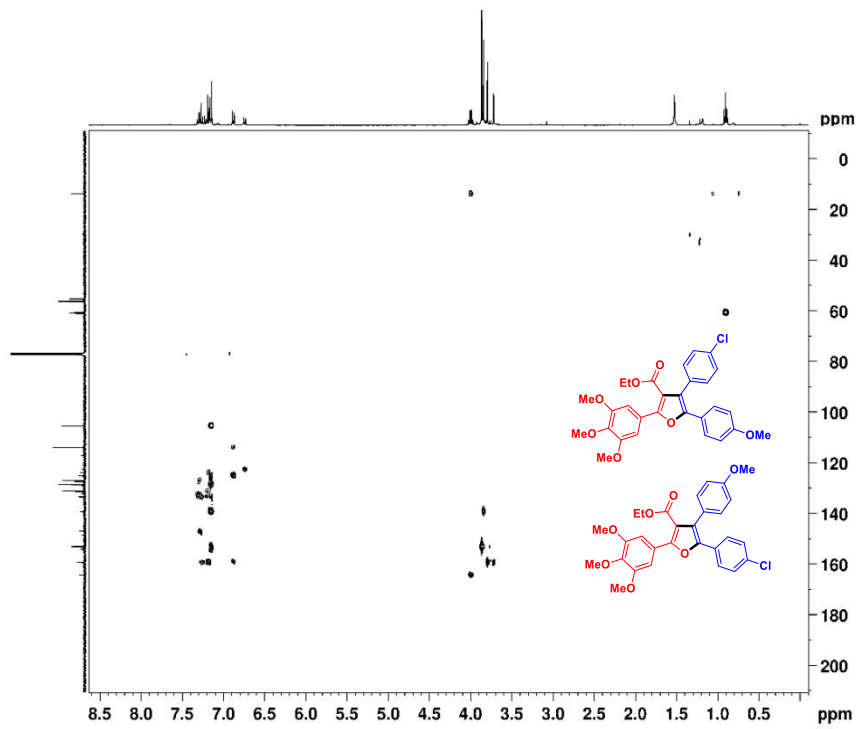

### HRMS SPECTRUM OF COMPOUND-3ki

D:\internals 2022\...\HRMS22121OCT19

10/21/2022 1:15:00 PM

HRMS22121OCT19 #50 RT: 0.38 AV: 1 NL: 7.85E5  
T: FTMS + c ESI Full ms [100.00-750.00]

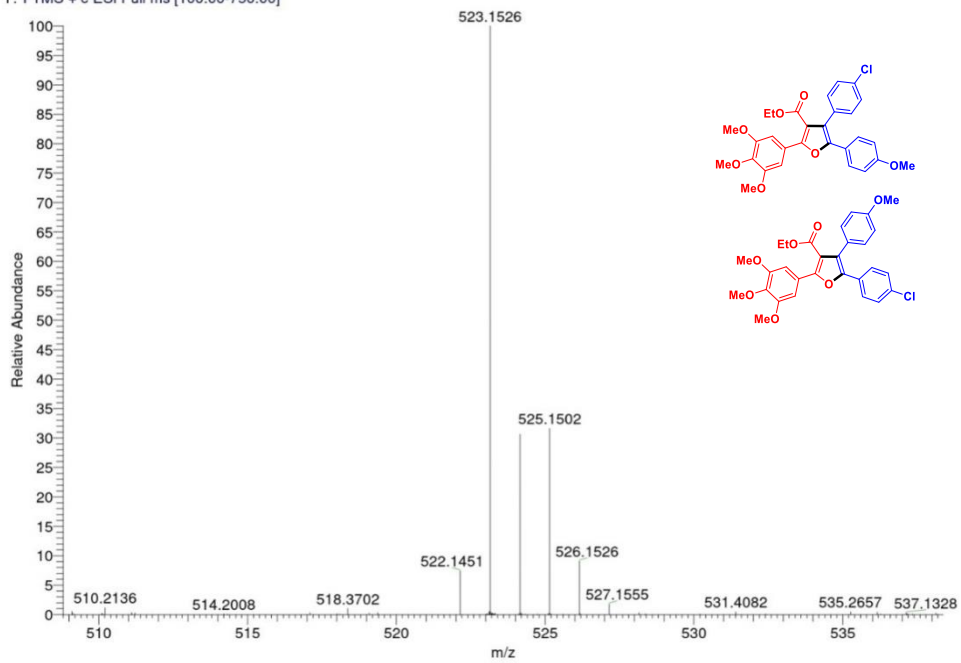



<sup>1</sup>H NMR spectrum of compound- 3kh (400 MHz, CDCl<sub>3</sub>); X= wax impurity

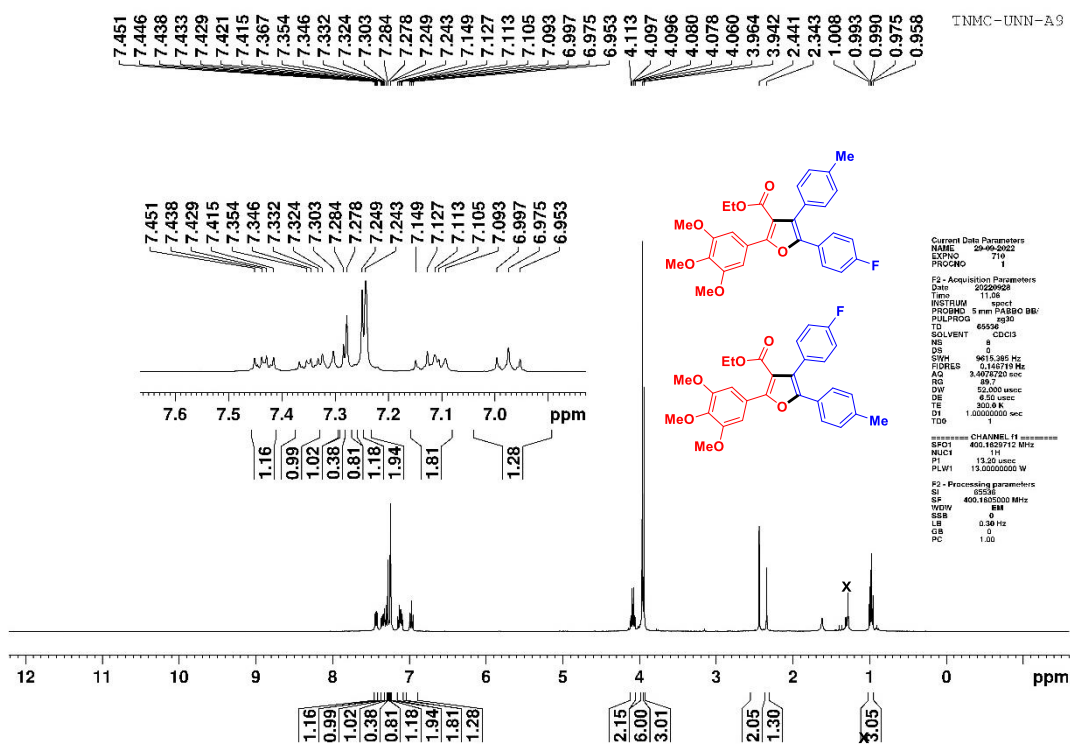

<sup>13</sup>C NMR spectrum of compound- 3kh (400 MHz, CDCl<sub>3</sub>); X= wax impurity

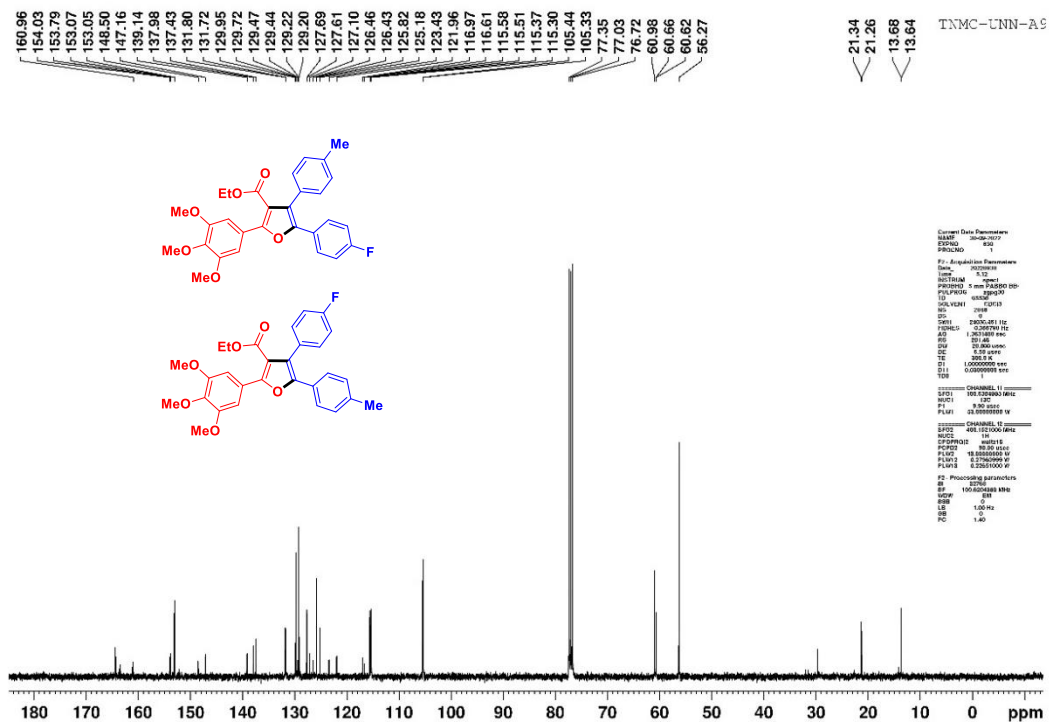

# HRMS SPECTRUM OF COMPOUND-3kh

D:\Internals 2022\...HRMS22121OCT20

10/21/2022 1:16:56 PM

HRMS22121OCT20 #18 RT: 0.15 AV: 1 NL: 1.07E7  
T: FTMS + c ESI Full ms [100.00-750.00]

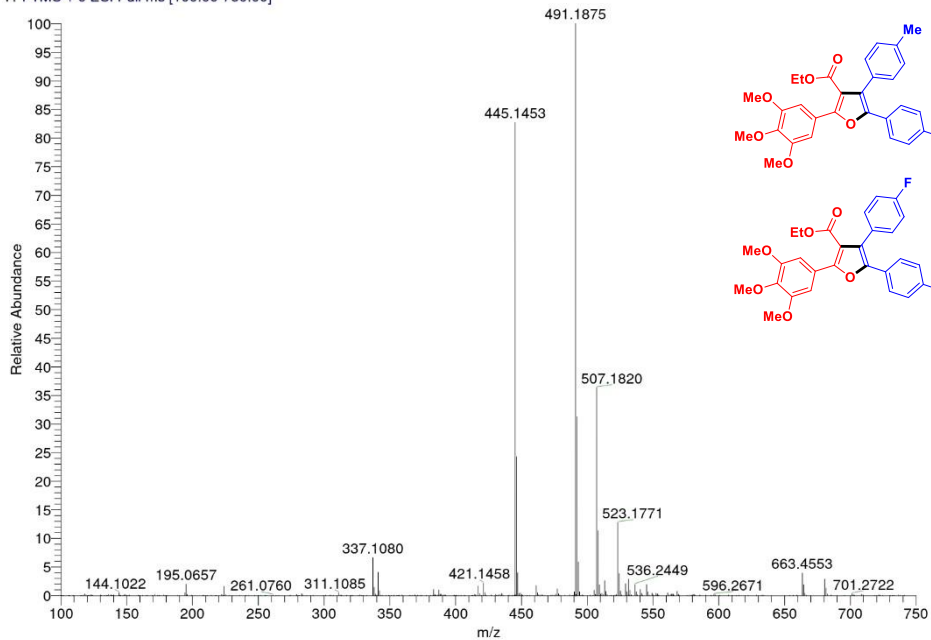

## <sup>1</sup>H NMR spectrum of compound- 3aj (400 MHz, CDCl<sub>3</sub>); Y=H<sub>2</sub>O impurity

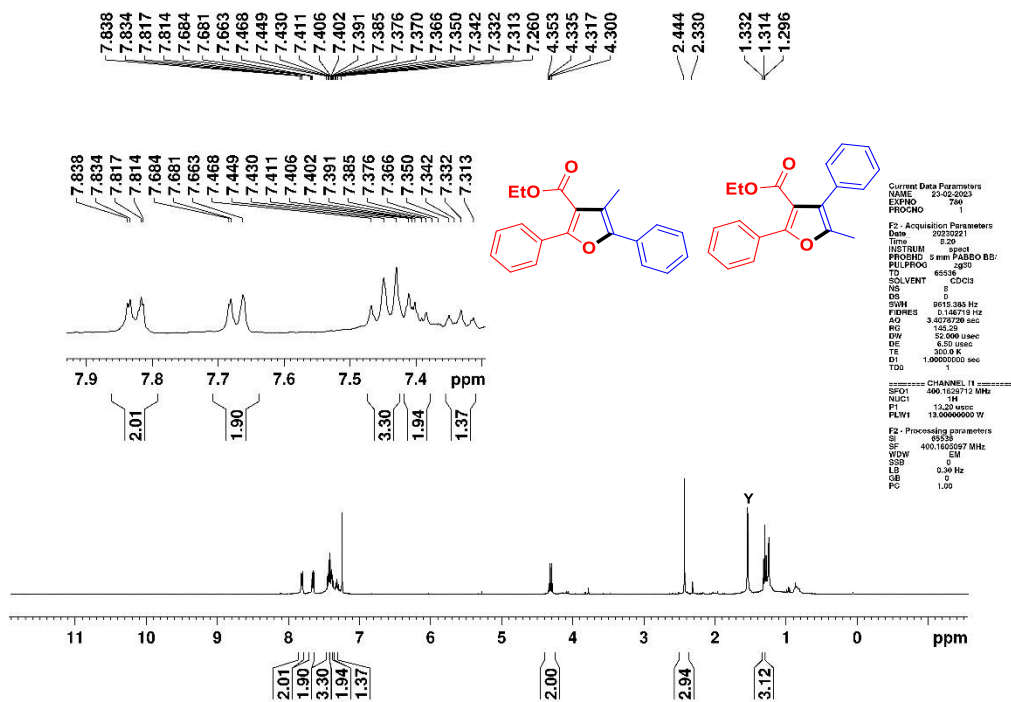

<sup>13</sup>C NMR spectrum of compound- 3aj (100 MHz, CDCl<sub>3</sub>); X= wax impurity

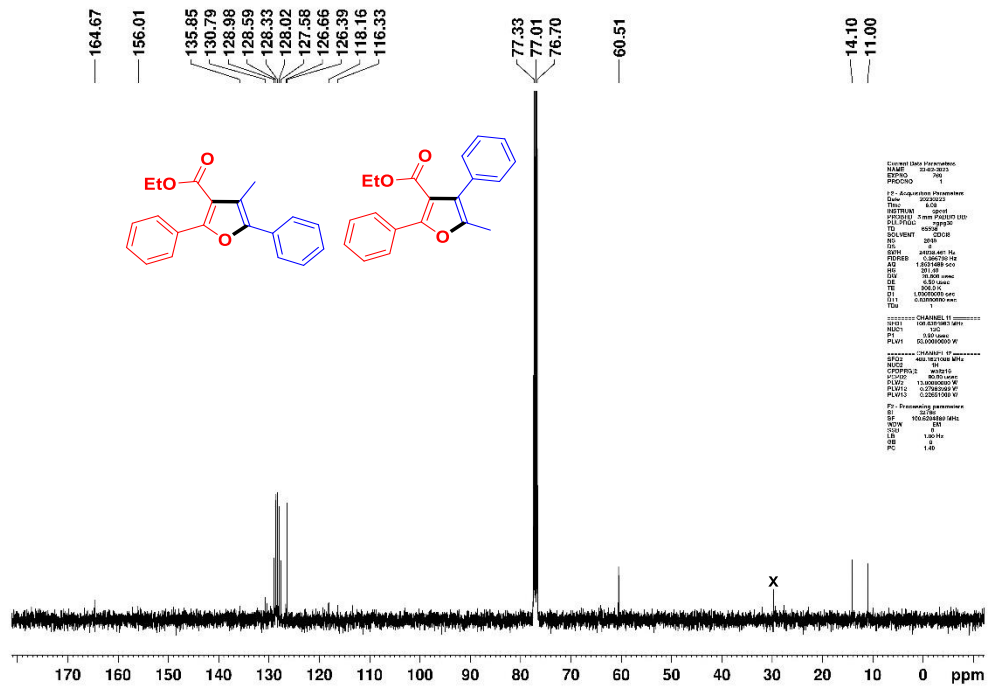

Cosy spectrum of compound – 3aj

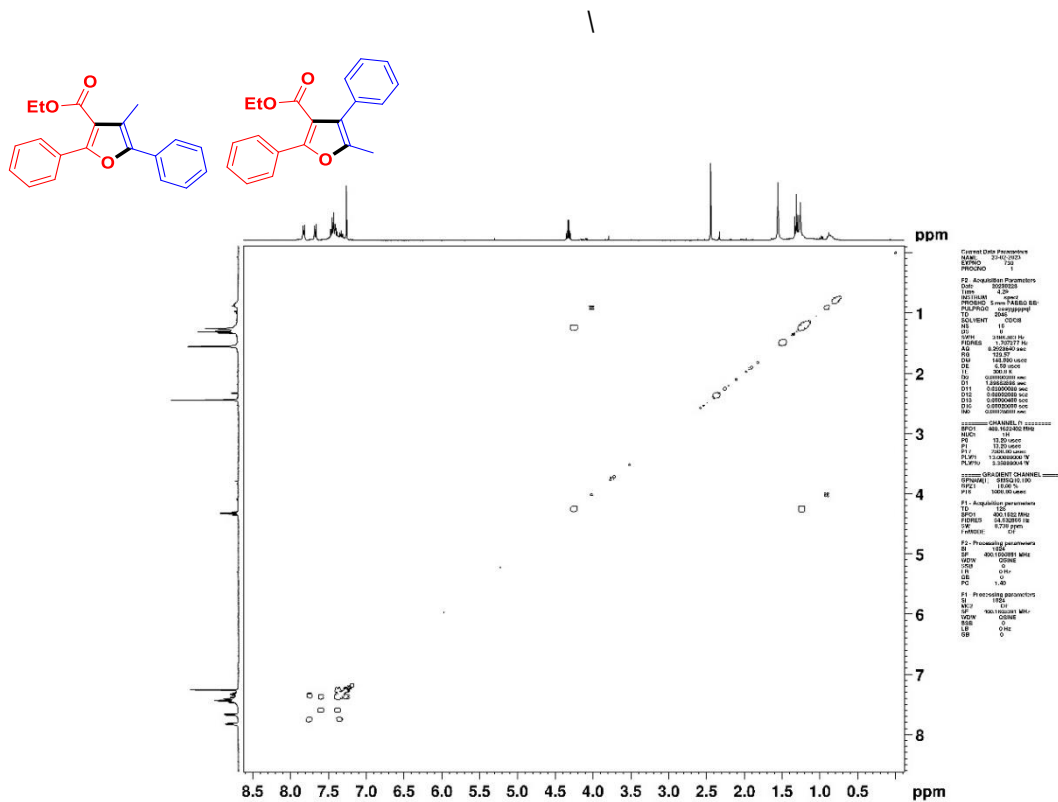

### HMBC spectrum of compound-3aj

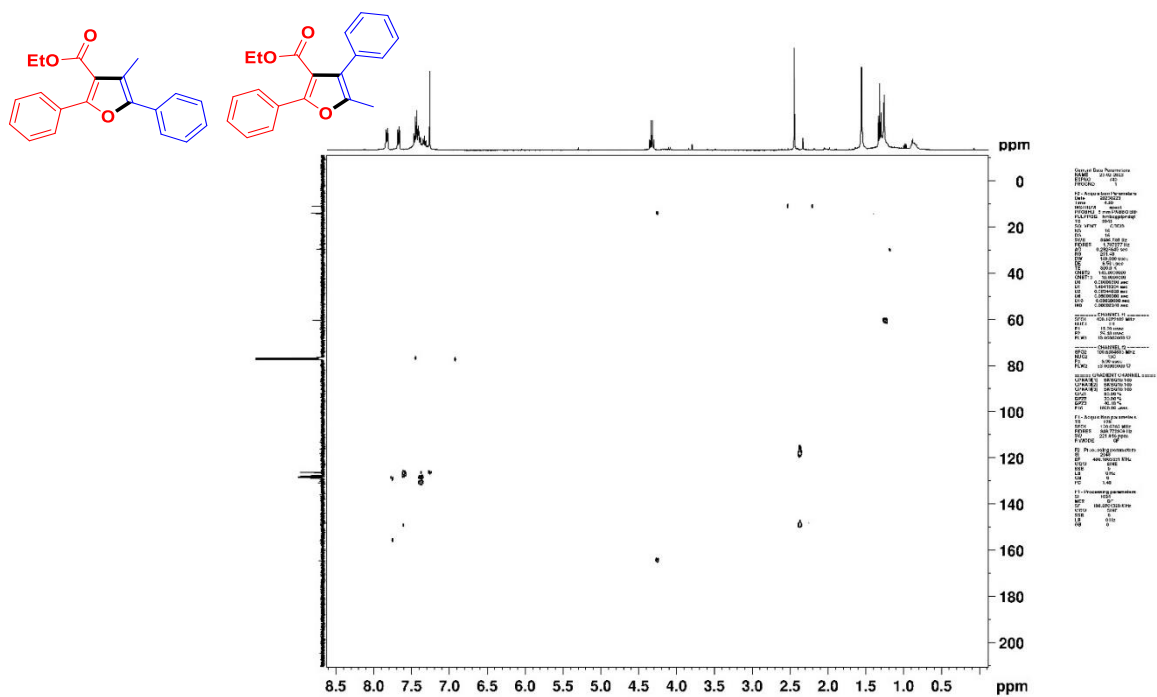

### HSQC SPECTRUM OF COMPOUND – 3aj

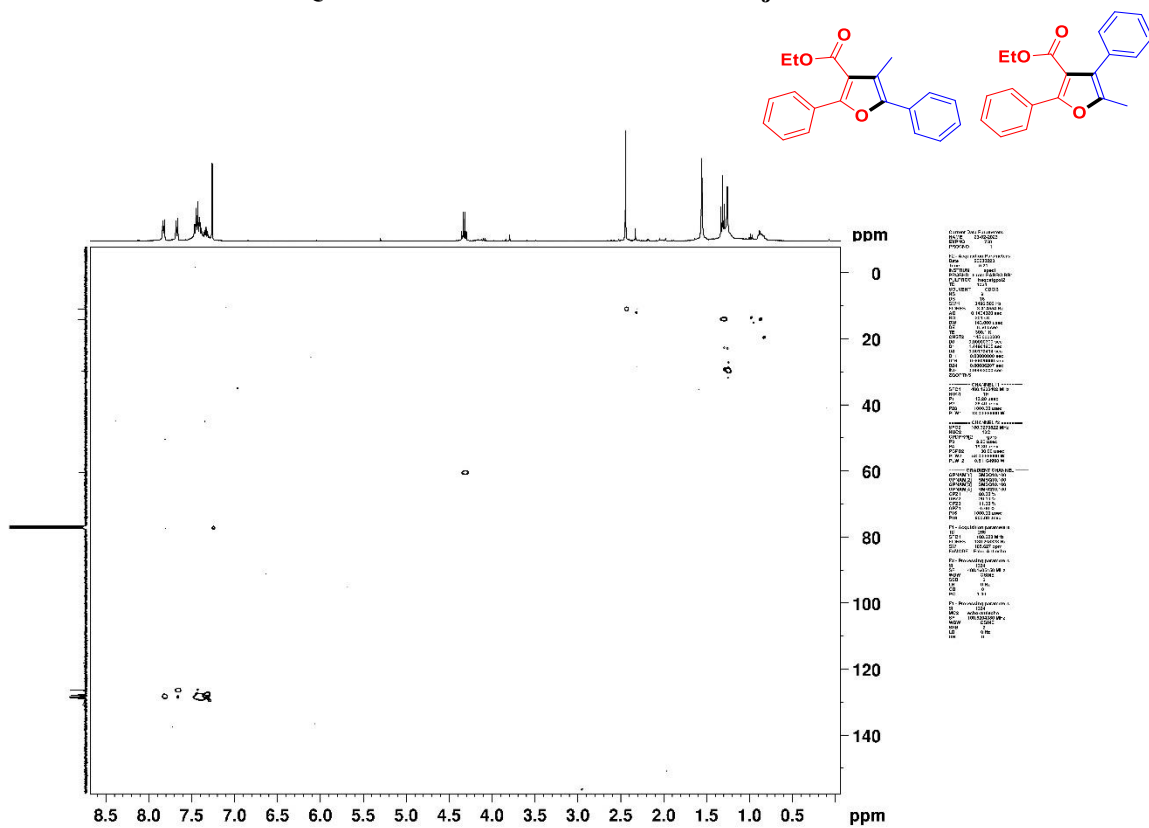

### HRMS SPECTRUM OF COMPOUND-3aj

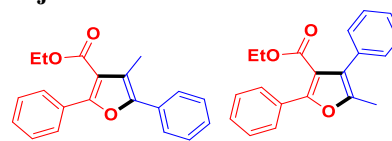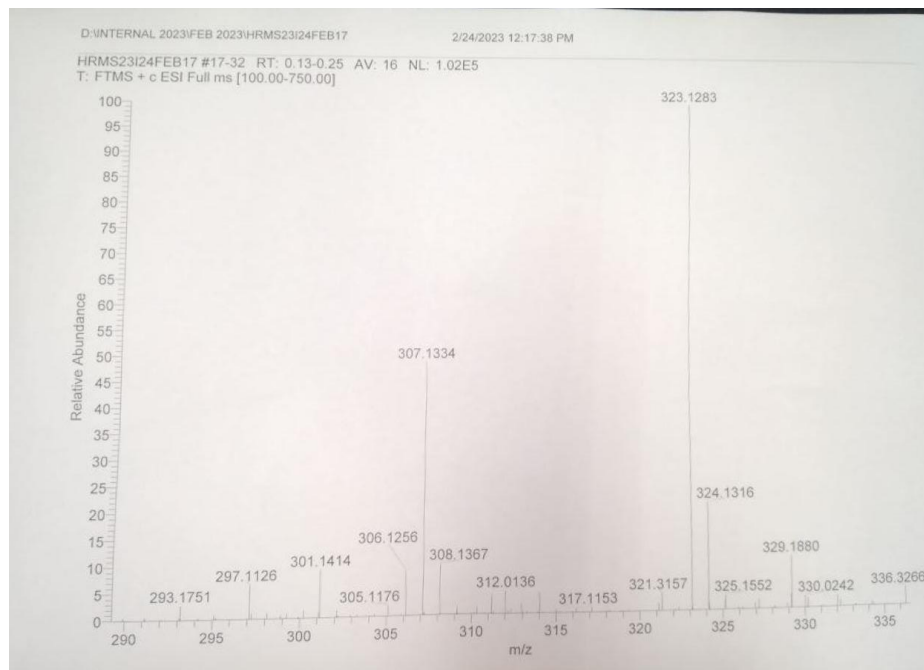

### <sup>1</sup>H NMR spectrum of compound- 3kj (400 MHz, CDCl<sub>3</sub>);

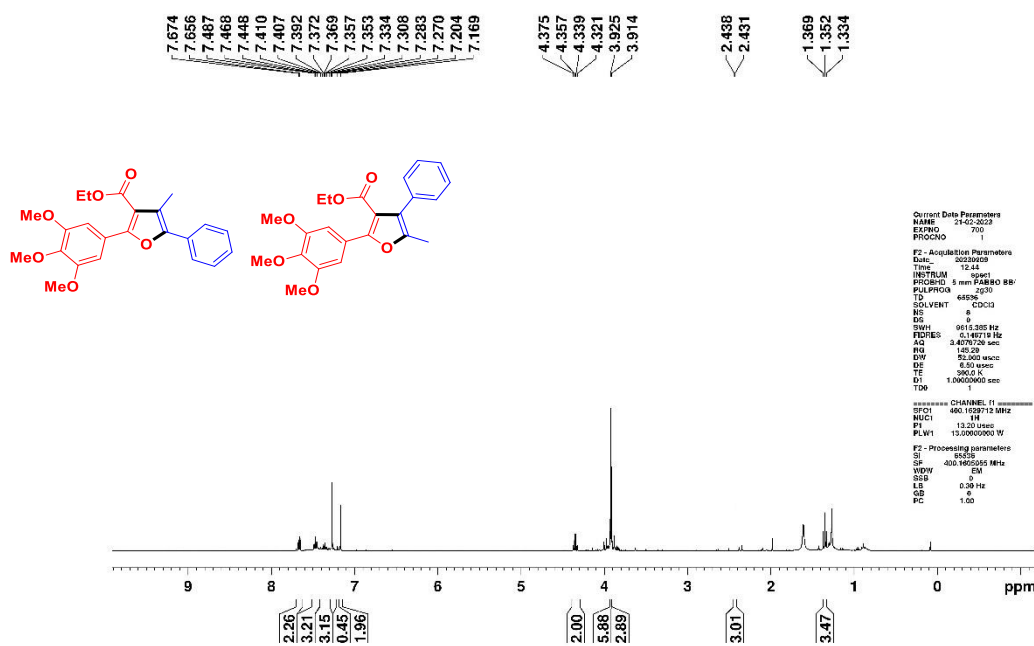



## HSQC SPECTRUM OF COMPOUND – 3kj

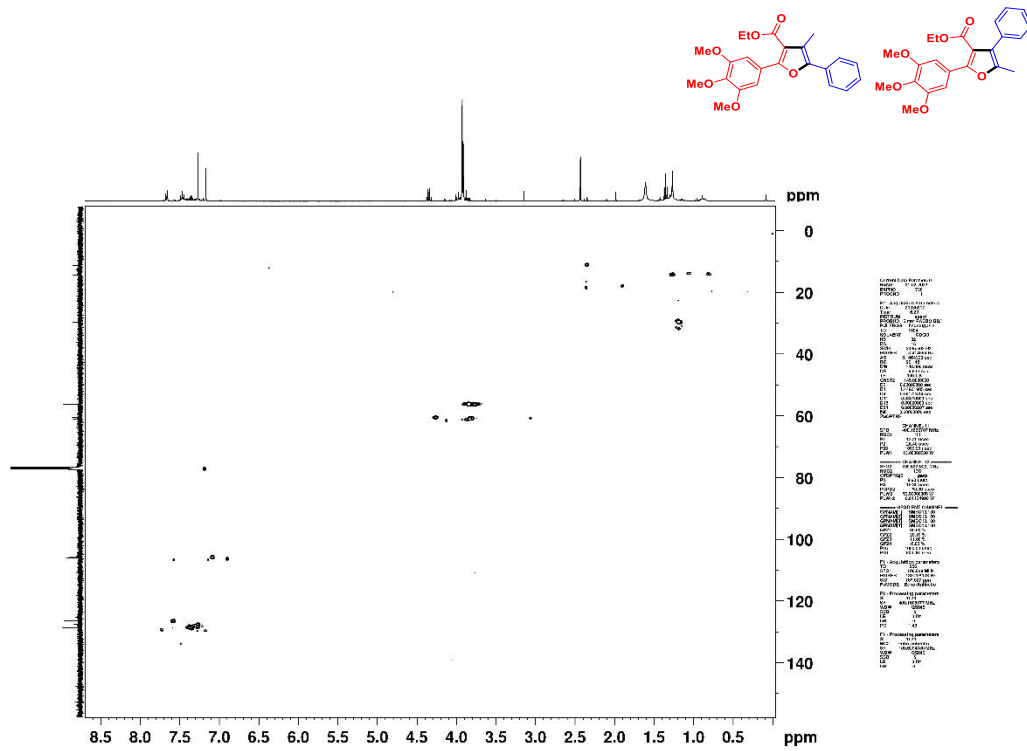

## HRMS spectrum of compound-3kj

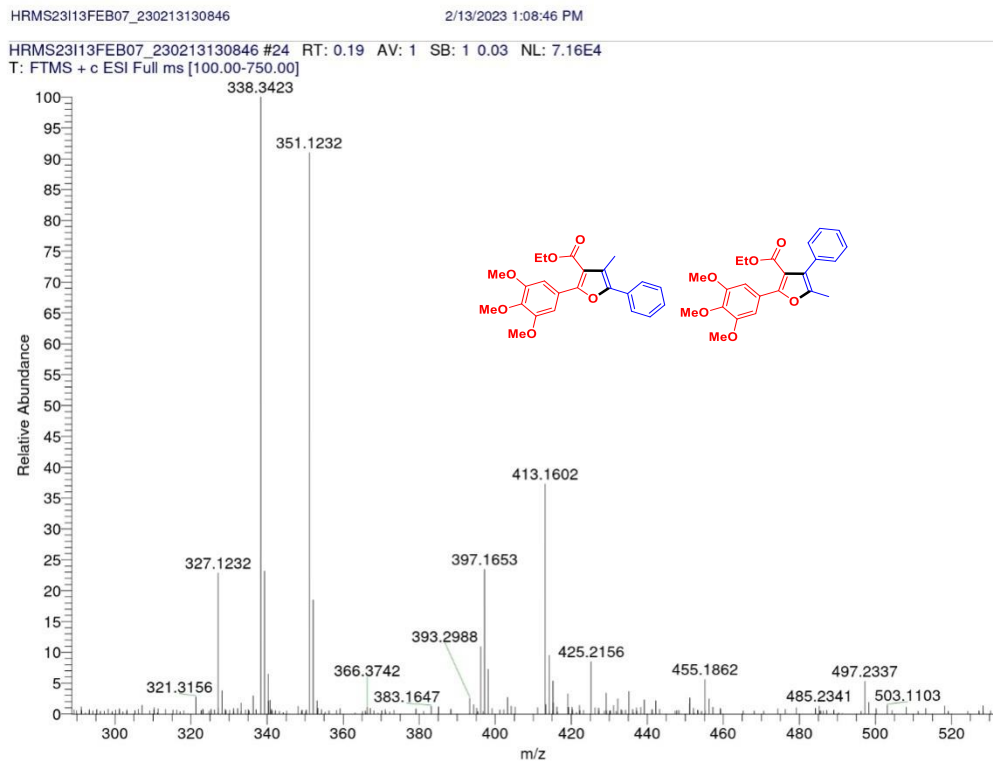

<sup>1</sup>H NMR spectrum of compound- 3kj (400 MHz, CDCl<sub>3</sub>); X = Wax impurity

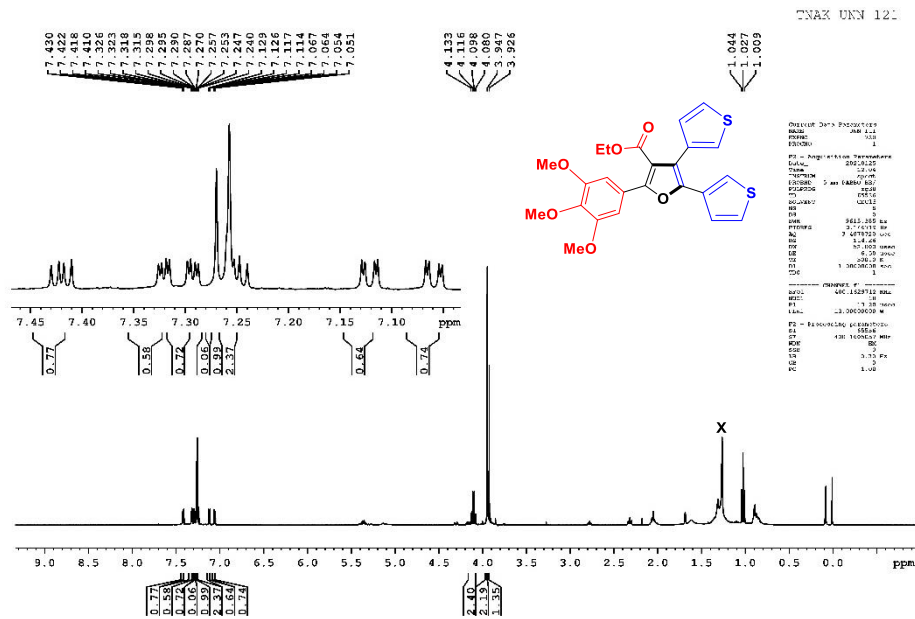

<sup>13</sup>C NMR spectrum of compound- 3kj (100 MHz, CDCl<sub>3</sub>); X=wax impurity

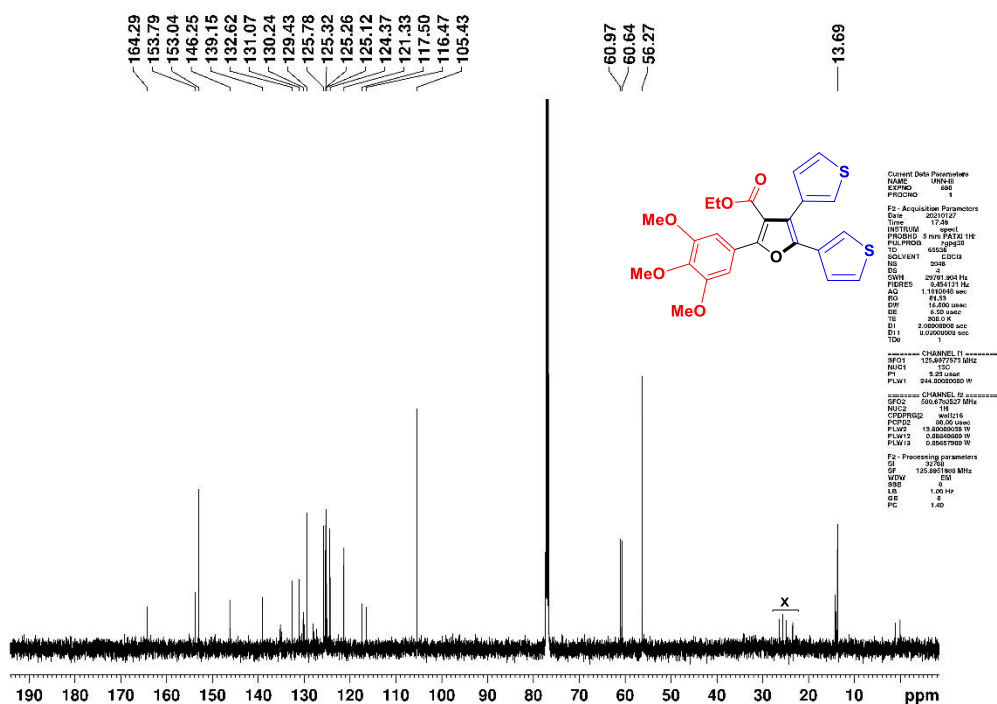



## HRMS spectrum of compound-3kj

|                   |                      |                       |                               |
|-------------------|----------------------|-----------------------|-------------------------------|
| Data File:        | HRMS21I23FEB31       | Original Data Path:   | D:\INTERNAL NEW\2021\Feb 2021 |
| Sample ID:        | TNAK-UNN12           | Sample Name:          |                               |
| Acquisition Date: | 02/23/21 11:31:36 AM | Run Time(min):        | 0.00                          |
| Vial:             | CStk1-01:31          | Injection Volume(μl): | 1.00                          |

HRMS21I23FEB31 #29-61 RT: 0.25-0.50 AV: 33 SB: 1 0.01 NL: 1.63E6  
T: FTMS + c ESI Full ms [100.00-750.00]

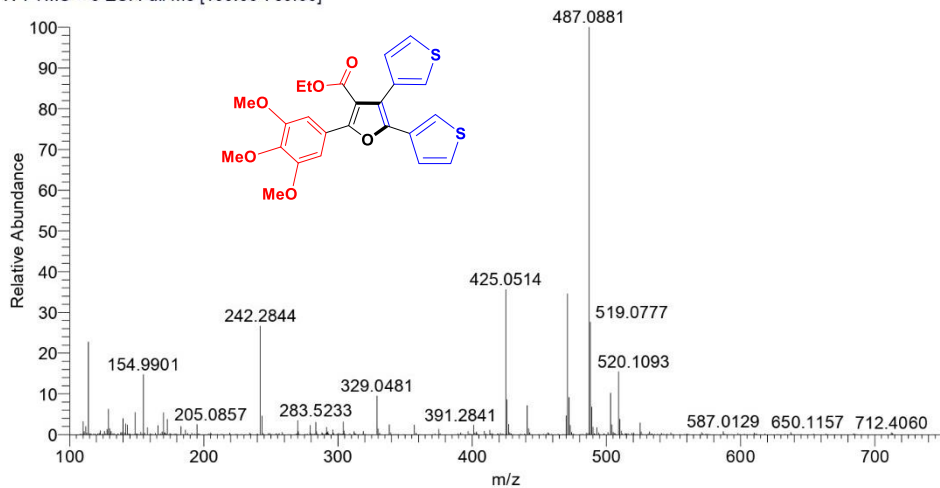

## <sup>1</sup>H NMR spectrum of compound- 3la (400 MHz, CDCl<sub>3</sub>); X= wax impurity

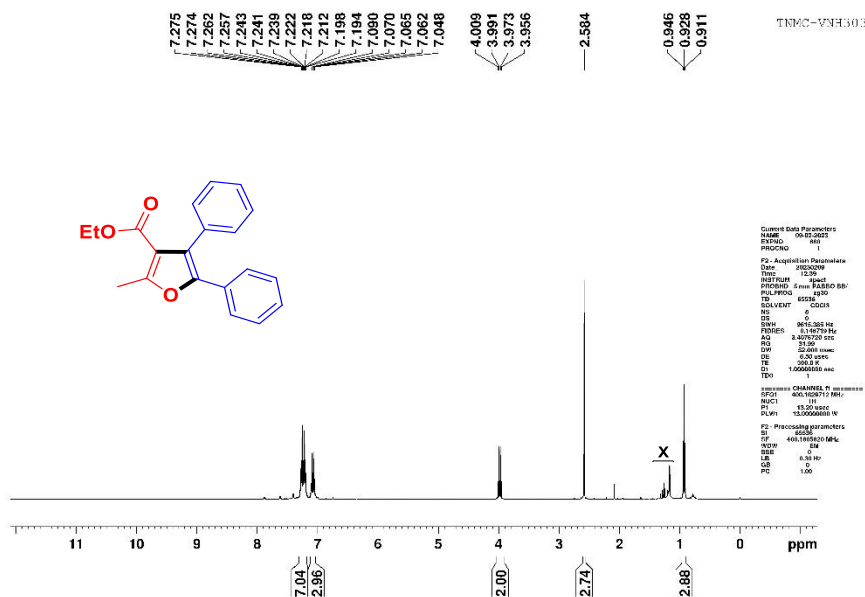

<sup>13</sup>C NMR spectrum of compound- 3la (100 MHz, CDCl<sub>3</sub>); X= wax impurity

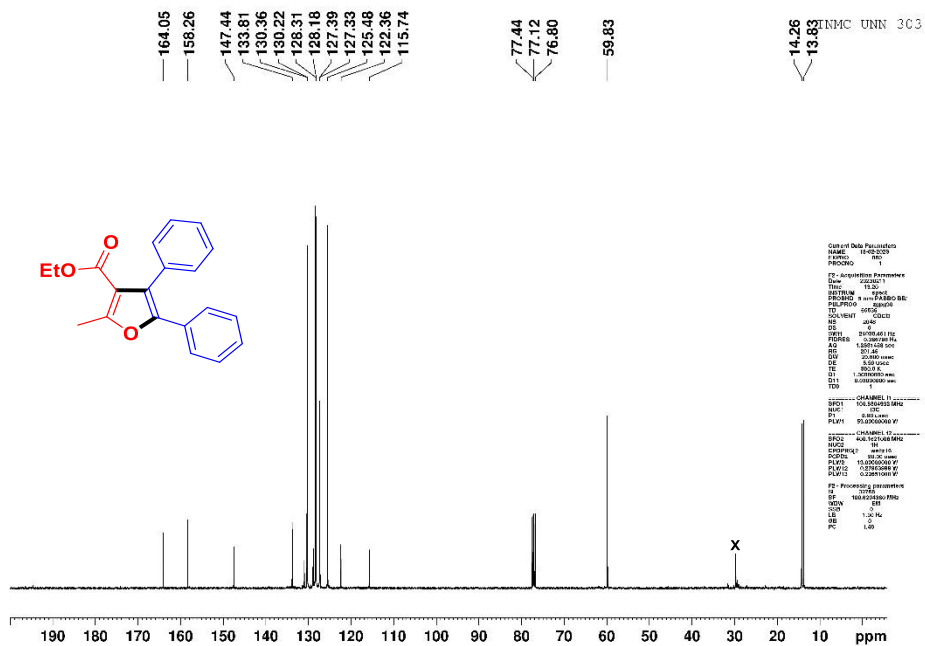

HRMS spectrum of compound-3la

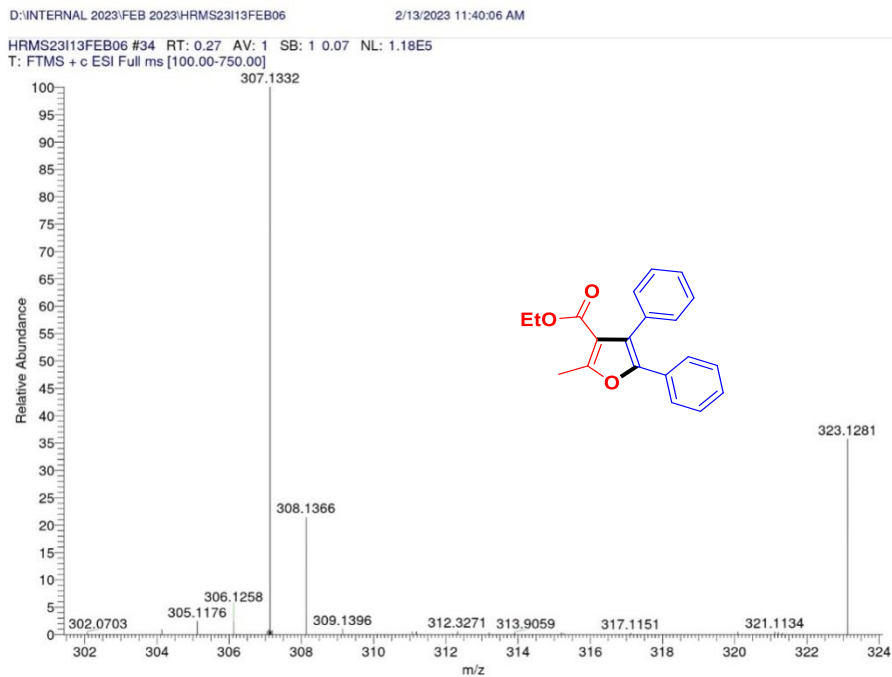

<sup>1</sup>H NMR spectrum of compound- 3ma (400 MHz, CDCl<sub>3</sub>); X= wax impurity

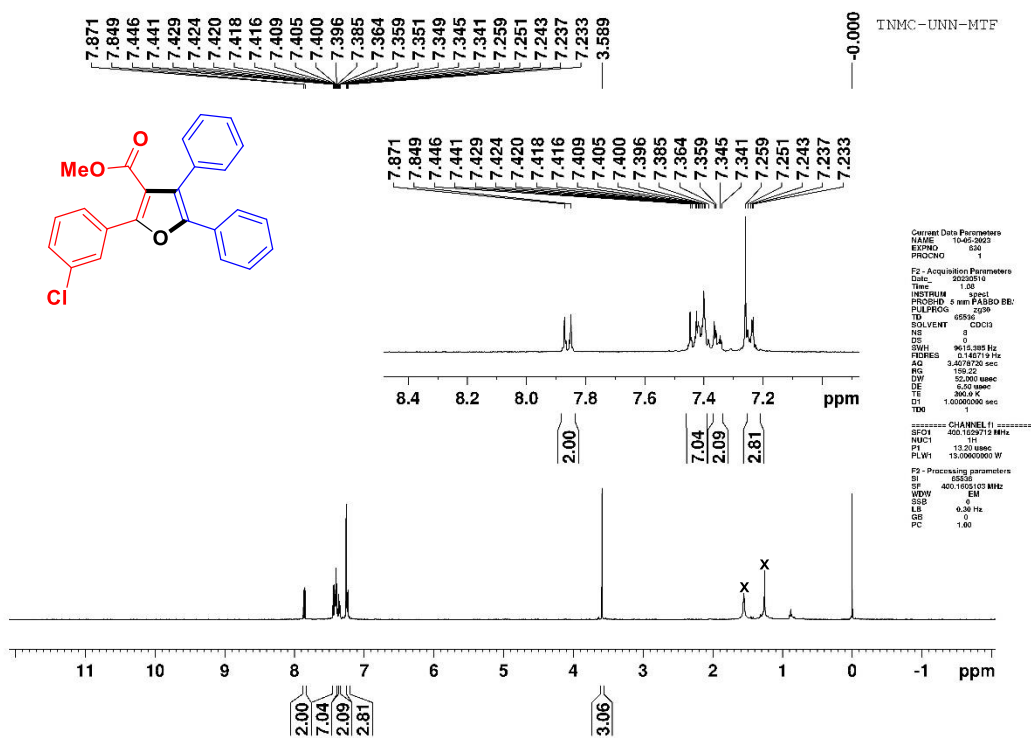

<sup>13</sup>C NMR spectrum of compound- 3ma (100 MHz, CDCl<sub>3</sub>); X= wax impurity

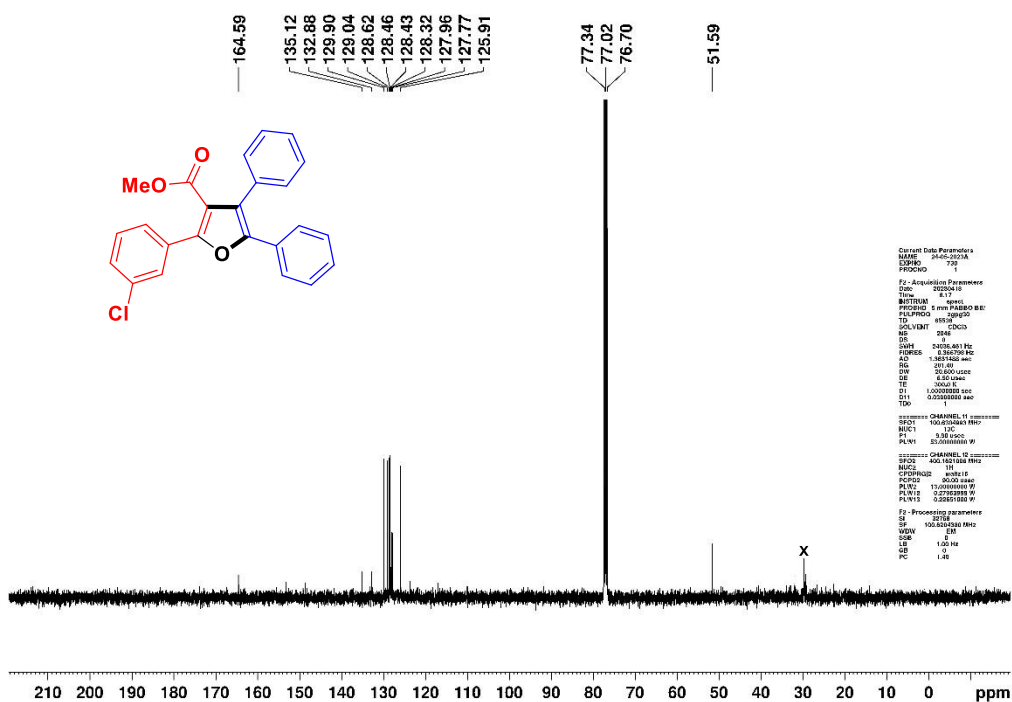

<sup>1</sup>H NMR spectrum of compound- 4 (400 MHz, DMSO-d<sub>6</sub>);

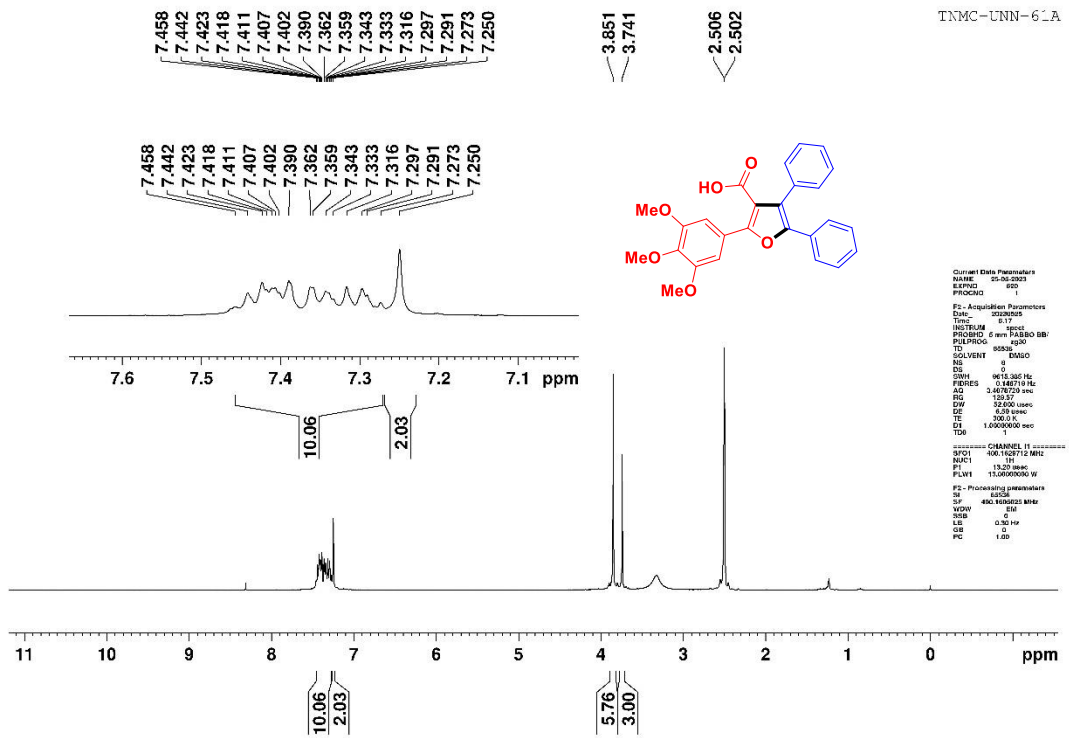

<sup>13</sup>C NMR spectrum of compound- 4 (100 MHz, DMSO-d<sub>6</sub>);

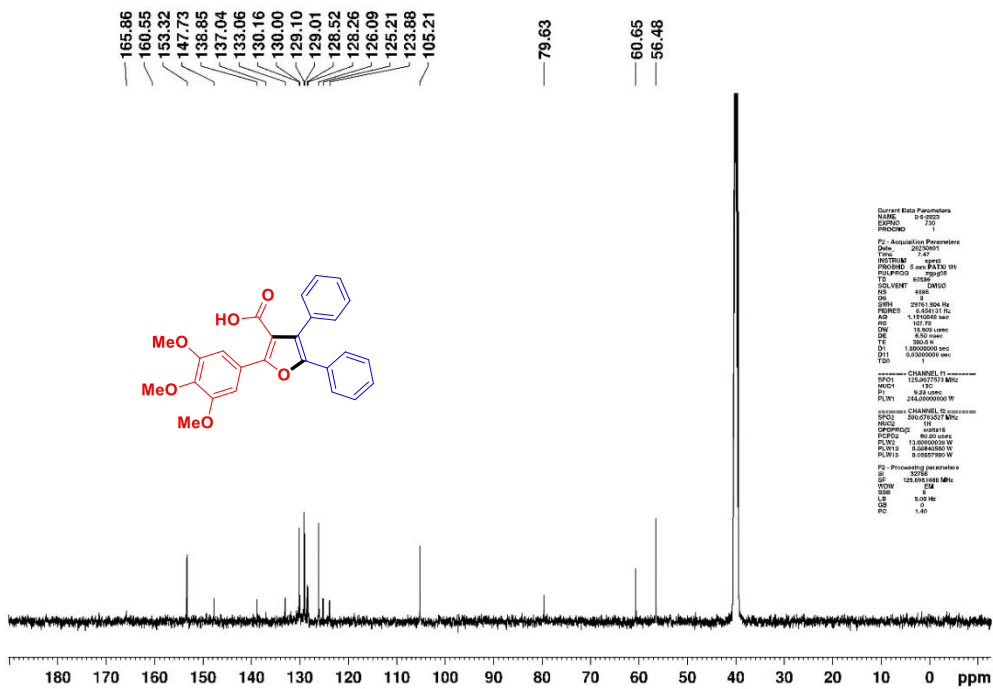

## ESMS spectrum of compound-4

Openlynx Report SAIF, CSIR-CDRI, LUCKNOW

Sample: 1570  
File:ESMS231MAY32  
Description:TNMC-UNN-61A

Vial:1:C.8  
Date:31-May-2023

ID:ESMS231MAY32  
Time:11:38:22

Page 2

Printed: Wed May 31 14:28:29 2023

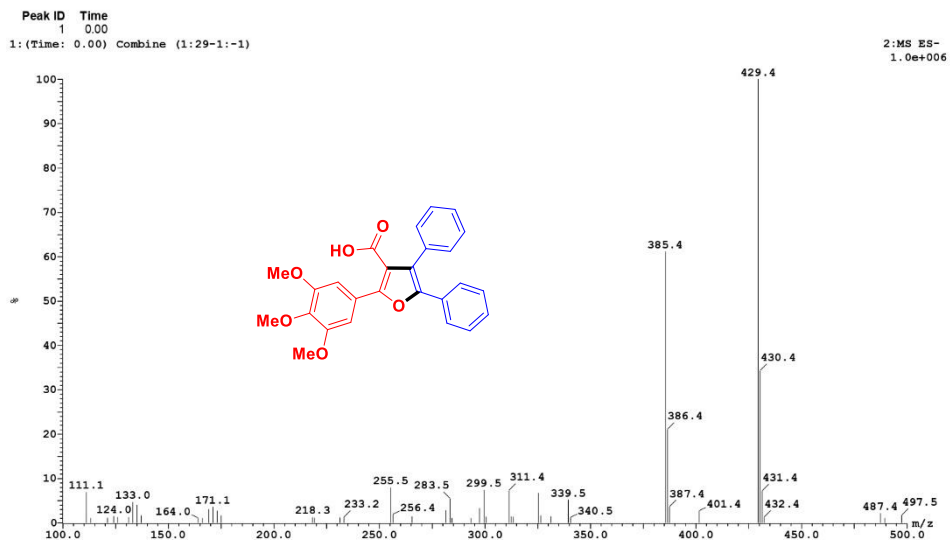

## <sup>1</sup>H NMR spectrum of compound- 5 (400 MHz, CDCl<sub>3</sub>)

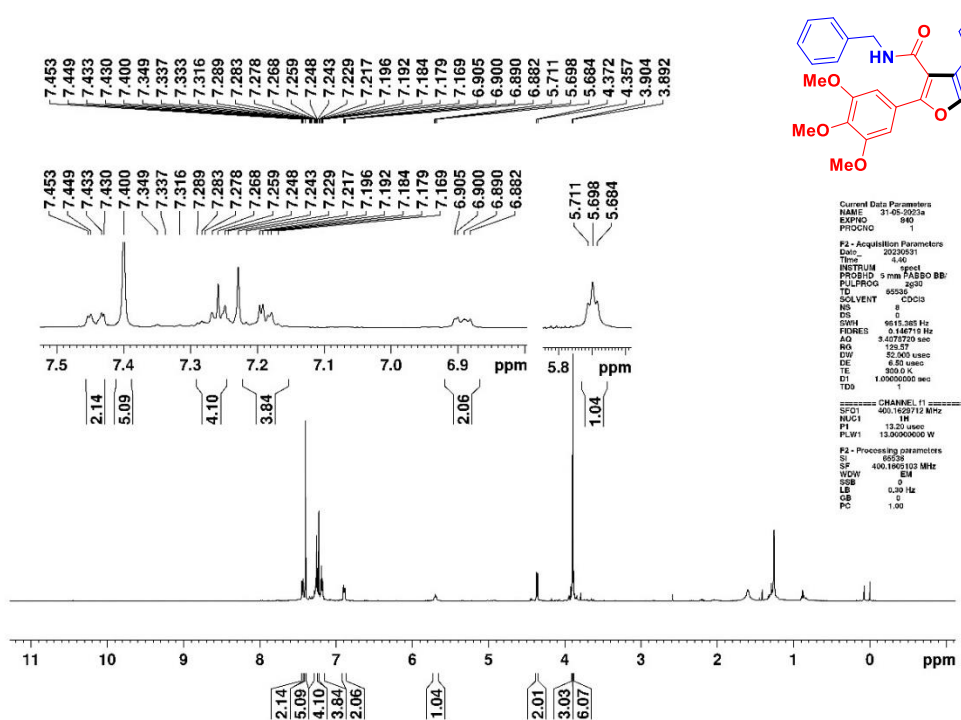

**$^{13}\text{C}$  NMR spectrum of compound- 5 (100 MHz,  $\text{CDCl}_3$ )**

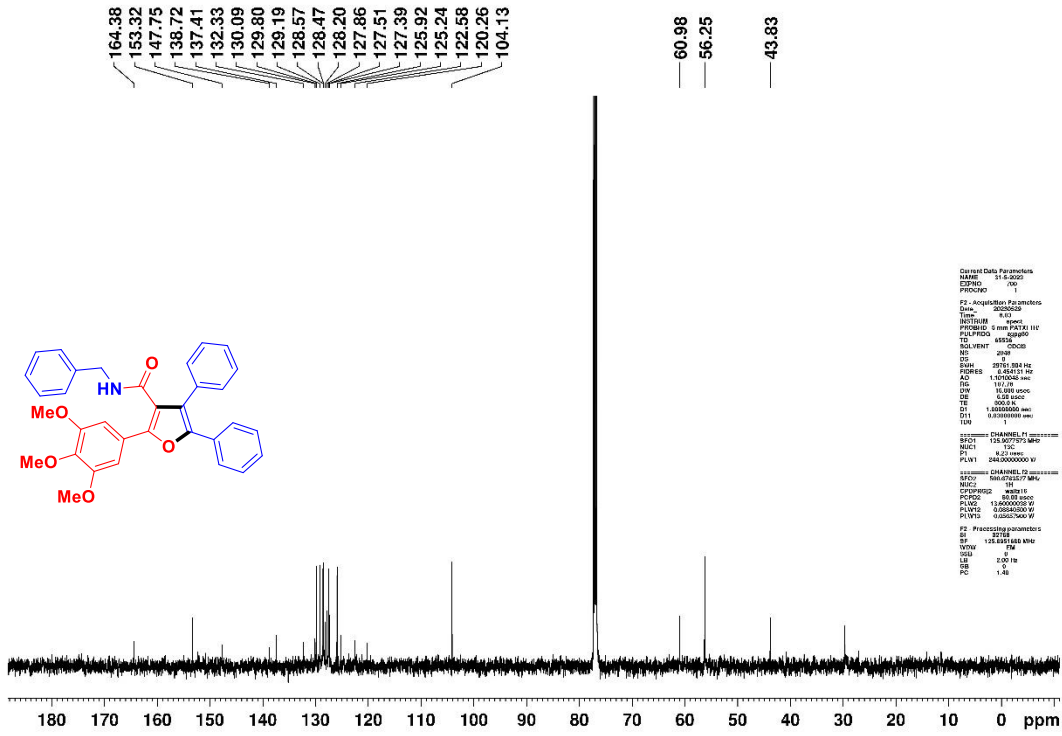

```

===== CHANNEL F1 =====
SFO1 125.807374 MHz
MUL1 4
NUC1 13C
PUL1 258.00000000 V
===== CHANNEL F2 =====
SFO2 62.815737 MHz
MUL2 4
NUC2 13C
PUL2 129.00000000 V
===== CHANNEL F3 =====
SFO3 125.807374 MHz
MUL3 4
NUC3 13C
PUL3 258.00000000 V
===== CHANNEL F4 =====
SFO4 62.815737 MHz
MUL4 4
NUC4 13C
PUL4 129.00000000 V
===== CHANNEL F5 =====
SFO5 125.807374 MHz
MUL5 4
NUC5 13C
PUL5 258.00000000 V
===== CHANNEL F6 =====
SFO6 62.815737 MHz
MUL6 4
NUC6 13C
PUL6 129.00000000 V
===== CHANNEL F7 =====
SFO7 125.807374 MHz
MUL7 4
NUC7 13C
PUL7 258.00000000 V
===== CHANNEL F8 =====
SFO8 62.815737 MHz
MUL8 4
NUC8 13C
PUL8 129.00000000 V
===== CHANNEL F9 =====
SFO9 125.807374 MHz
MUL9 4
NUC9 13C
PUL9 258.00000000 V
===== CHANNEL F10 =====
SFO10 62.815737 MHz
MUL10 4
NUC10 13C
PUL10 129.00000000 V
===== CHANNEL F11 =====
SFO11 125.807374 MHz
MUL11 4
NUC11 13C
PUL11 258.00000000 V
===== CHANNEL F12 =====
SFO12 62.815737 MHz
MUL12 4
NUC12 13C
PUL12 129.00000000 V
===== CHANNEL F13 =====
SFO13 125.807374 MHz
MUL13 4
NUC13 13C
PUL13 258.00000000 V
===== CHANNEL F14 =====
SFO14 62.815737 MHz
MUL14 4
NUC14 13C
PUL14 129.00000000 V
===== CHANNEL F15 =====
SFO15 125.807374 MHz
MUL15 4
NUC15 13C
PUL15 258.00000000 V
===== CHANNEL F16 =====
SFO16 62.815737 MHz
MUL16 4
NUC16 13C
PUL16 129.00000000 V
===== CHANNEL F17 =====
SFO17 125.807374 MHz
MUL17 4
NUC17 13C
PUL17 258.00000000 V
===== CHANNEL F18 =====
SFO18 62.815737 MHz
MUL18 4
NUC18 13C
PUL18 129.00000000 V
===== CHANNEL F19 =====
SFO19 125.807374 MHz
MUL19 4
NUC19 13C
PUL19 258.00000000 V
===== CHANNEL F20 =====
SFO20 62.815737 MHz
MUL20 4
NUC20 13C
PUL20 129.00000000 V
===== CHANNEL F21 =====
SFO21 125.807374 MHz
MUL21 4
NUC21 13C
PUL21 258.00000000 V
===== CHANNEL F22 =====
SFO22 62.815737 MHz
MUL22 4
NUC22 13C
PUL22 129.00000000 V
===== CHANNEL F23 =====
SFO23 125.807374 MHz
MUL23 4
NUC23 13C
PUL23 258.00000000 V
===== CHANNEL F24 =====
SFO24 62.815737 MHz
MUL24 4
NUC24 13C
PUL24 129.00000000 V
===== CHANNEL F25 =====
SFO25 125.807374 MHz
MUL25 4
NUC25 13C
PUL25 258.00000000 V
===== CHANNEL F26 =====
SFO26 62.815737 MHz
MUL26 4
NUC26 13C
PUL26 129.00000000 V
===== CHANNEL F27 =====
SFO27 125.807374 MHz
MUL27 4
NUC27 13C
PUL27 258.00000000 V
===== CHANNEL F28 =====
SFO28 62.815737 MHz
MUL28 4
NUC28 13C
PUL28 129.00000000 V
===== CHANNEL F29 =====
SFO29 125.807374 MHz
MUL29 4
NUC29 13C
PUL29 258.00000000 V
===== CHANNEL F30 =====
SFO30 62.815737 MHz
MUL30 4
NUC30 13C
PUL30 129.00000000 V
===== CHANNEL F31 =====
SFO31 125.807374 MHz
MUL31 4
NUC31 13C
PUL31 258.00000000 V
===== CHANNEL F32 =====
SFO32 62.815737 MHz
MUL32 4
NUC32 13C
PUL32 129.00000000 V
===== CHANNEL F33 =====
SFO33 125.807374 MHz
MUL33 4
NUC33 13C
PUL33 258.00000000 V
===== CHANNEL F34 =====
SFO34 62.815737 MHz
MUL34 4
NUC34 13C
PUL34 129.00000000 V
===== CHANNEL F35 =====
SFO35 125.807374 MHz
MUL35 4
NUC35 13C
PUL35 258.00000000 V
===== CHANNEL F36 =====
SFO36 62.815737 MHz
MUL36 4
NUC36 13C
PUL36 129.00000000 V
===== CHANNEL F37 =====
SFO37 125.807374 MHz
MUL37 4
NUC37 13C
PUL37 258.00000000 V
===== CHANNEL F38 =====
SFO38 62.815737 MHz
MUL38 4
NUC38 13C
PUL38 129.00000000 V
===== CHANNEL F39 =====
SFO39 125.807374 MHz
MUL39 4
NUC39 13C
PUL39 258.00000000 V
===== CHANNEL F40 =====
SFO40 62.815737 MHz
MUL40 4
NUC40 13C
PUL40 129.00000000 V
===== CHANNEL F41 =====
SFO41 125.807374 MHz
MUL41 4
NUC41 13C
PUL41 258.00000000 V
===== CHANNEL F42 =====
SFO42 62.815737 MHz
MUL42 4
NUC42 13C
PUL42 129.00000000 V
===== CHANNEL F43 =====
SFO43 125.807374 MHz
MUL43 4
NUC43 13C
PUL43 258.00000000 V
===== CHANNEL F44 =====
SFO44 62.815737 MHz
MUL44 4
NUC44 13C
PUL44 129.00000000 V
===== CHANNEL F45 =====
SFO45 125.807374 MHz
MUL45 4
NUC45 13C
PUL45 258.00000000 V
===== CHANNEL F46 =====
SFO46 62.815737 MHz
MUL46 4
NUC46 13C
PUL46 129.00000000 V
===== CHANNEL F47 =====
SFO47 125.807374 MHz
MUL47 4
NUC47 13C
PUL47 258.00000000 V
===== CHANNEL F48 =====
SFO48 62.815737 MHz
MUL48 4
NUC48 13C
PUL48 129.00000000 V
===== CHANNEL F49 =====
SFO49 125.807374 MHz
MUL49 4
NUC49 13C
PUL49 258.00000000 V
===== CHANNEL F50 =====
SFO50 62.815737 MHz
MUL50 4
NUC50 13C
PUL50 129.00000000 V
===== CHANNEL F51 =====
SFO51 125.807374 MHz
MUL51 4
NUC51 13C
PUL51 258.00000000 V
===== CHANNEL F52 =====
SFO52 62.815737 MHz
MUL52 4
NUC52 13C
PUL52 129.00000000 V
===== CHANNEL F53 =====
SFO53 125.807374 MHz
MUL53 4
NUC53 13C
PUL53 258.00000000 V
===== CHANNEL F54 =====
SFO54 62.815737 MHz
MUL54 4
NUC54 13C
PUL54 129.00000000 V
===== CHANNEL F55 =====
SFO55 125.807374 MHz
MUL55 4
NUC55 13C
PUL55 258.00000000 V
===== CHANNEL F56 =====
SFO56 62.815737 MHz
MUL56 4
NUC56 13C
PUL56 129.00000000 V
===== CHANNEL F57 =====
SFO57 125.807374 MHz
MUL57 4
NUC57 13C
PUL57 258.00000000 V
===== CHANNEL F58 =====
SFO58 62.815737 MHz
MUL58 4
NUC58 13C
PUL58 129.00000000 V
===== CHANNEL F59 =====
SFO59 125.807374 MHz
MUL59 4
NUC59 13C
PUL59 258.00000000 V
===== CHANNEL F60 =====
SFO60 62.815737 MHz
MUL60 4
NUC60 13C
PUL60 129.00000000 V
===== CHANNEL F61 =====
SFO61 125.807374 MHz
MUL61 4
NUC61 13C
PUL61 258.00000000 V
===== CHANNEL F62 =====
SFO62 62.815737 MHz
MUL62 4
NUC62 13C
PUL62 129.00000000 V
===== CHANNEL F63 =====
SFO63 125.807374 MHz
MUL63 4
NUC63 13C
PUL63 258.00000000 V
===== CHANNEL F64 =====
SFO64 62.815737 MHz
MUL64 4
NUC64 13C
PUL64 129.00000000 V
===== CHANNEL F65 =====
SFO65 125.807374 MHz
MUL65 4
NUC65 13C
PUL65 258.00000000 V
===== CHANNEL F66 =====
SFO66 62.815737 MHz
MUL66 4
NUC66 13C
PUL66 129.00000000 V
===== CHANNEL F67 =====
SFO67 125.807374 MHz
MUL67 4
NUC67 13C
PUL67 258.00000000 V
===== CHANNEL F68 =====
SFO68 62.815737 MHz
MUL68 4
NUC68 13C
PUL68 129.00000000 V
===== CHANNEL F69 =====
SFO69 125.807374 MHz
MUL69 4
NUC69 13C
PUL69 258.00000000 V
===== CHANNEL F70 =====
SFO70 62.815737 MHz
MUL70 4
NUC70 13C
PUL70 129.00000000 V
===== CHANNEL F71 =====
SFO71 125.807374 MHz
MUL71 4
NUC71 13C
PUL71 258.00000000 V
===== CHANNEL F72 =====
SFO72 62.815737 MHz
MUL72 4
NUC72 13C
PUL72 129.00000000 V
===== CHANNEL F73 =====
SFO73 125.807374 MHz
MUL73 4
NUC73 13C
PUL73 258.00000000 V
===== CHANNEL F74 =====
SFO74 62.815737 MHz
MUL74 4
NUC74 13C
PUL74 129.00000000 V
===== CHANNEL F75 =====
SFO75 125.807374 MHz
MUL75 4
NUC75 13C
PUL75 258.00000000 V
===== CHANNEL F76 =====
SFO76 62.815737 MHz
MUL76 4
NUC76 13C
PUL76 129.00000000 V
===== CHANNEL F77 =====
SFO77 125.807374 MHz
MUL77 4
NUC77 13C
PUL77 258.00000000 V
===== CHANNEL F78 =====
SFO78 62.815737 MHz
MUL78 4
NUC78 13C
PUL78 129.00000000 V
===== CHANNEL F79 =====
SFO79 125.807374 MHz
MUL79 4
NUC79 13C
PUL79 258.00000000 V
===== CHANNEL F80 =====
SFO80 62.815737 MHz
MUL80 4
NUC80 13C
PUL80 129.00000000 V
===== CHANNEL F81 =====
SFO81 125.807374 MHz
MUL81 4
NUC81 13C
PUL81 258.00000000 V
===== CHANNEL F82 =====
SFO82 62.815737 MHz
MUL82 4
NUC82 13C
PUL82 129.00000000 V
===== CHANNEL F83 =====
SFO83 125.807374 MHz
MUL83 4
NUC83 13C
PUL83 258.00000000 V
===== CHANNEL F84 =====
SFO84 62.815737 MHz
MUL84 4
NUC84 13C
PUL84 129.00000000 V
===== CHANNEL F85 =====
SFO85 125.807374 MHz
MUL85 4
NUC85 13C
PUL85 258.00000000 V
===== CHANNEL F86 =====
SFO86 62.815737 MHz
MUL86 4
NUC86 13C
PUL86 129.00000000 V
===== CHANNEL F87 =====
SFO87 125.807374 MHz
MUL87 4
NUC87 13C
PUL87 258.00000000 V
===== CHANNEL F88 =====
SFO88 62.815737 MHz
MUL88 4
NUC88 13C
PUL88 129.00000000 V
===== CHANNEL F89 =====
SFO89 125.807374 MHz
MUL89 4
NUC89 13C
PUL89 258.00000000 V
===== CHANNEL F90 =====
SFO90 62.815737 MHz
MUL90 4
NUC90 13C
PUL90 129.00000000 V
===== CHANNEL F91 =====
SFO91 125.807374 MHz
MUL91 4
NUC91 13C
PUL91 258.00000000 V
===== CHANNEL F92 =====
SFO92 62.815737 MHz
MUL92 4
NUC92 13C
PUL92 129.00000000 V
===== CHANNEL F93 =====
SFO93 125.807374 MHz
MUL93 4
NUC93 13C
PUL93 258.00000000 V
===== CHANNEL F94 =====
SFO94 62.815737 MHz
MUL94 4
NUC94 13C
PUL94 129.00000000 V
===== CHANNEL F95 =====
SFO95 125.807374 MHz
MUL95 4
NUC95 13C
PUL95 258.00000000 V
===== CHANNEL F96 =====
SFO96 62.815737 MHz
MUL96 4
NUC96 13C
PUL96 129.00000000 V
===== CHANNEL F97 =====
SFO97 125.807374 MHz
MUL97 4
NUC97 13C
PUL97 258.00000000 V
===== CHANNEL F98 =====
SFO98 62.815737 MHz
MUL98 4
NUC98 13C
PUL98 129.00000000 V
===== CHANNEL F99 =====
SFO99 125.807374 MHz
MUL99 4
NUC99 13C
PUL99 258.00000000 V
===== CHANNEL F100 =====
SFO100 62.815737 MHz
MUL100 4
NUC100 13C
PUL100 129.00000000 V

```

**ESMS spectrum of compound-5**

Openlynx Report SAIF, CSIR-CDRRI, LUCKNOW  
 Sample: 1571  
 File: ESMS23131MAY33  
 Description: TNMC-UNN-61C  
 Printed: Wed May 31 14:28:34 2023  
 Vial: 1-C,9  
 Date: 31-May-2023  
 ID: ESMS23131MAY33  
 Time: 11:40:19  
 Page 1

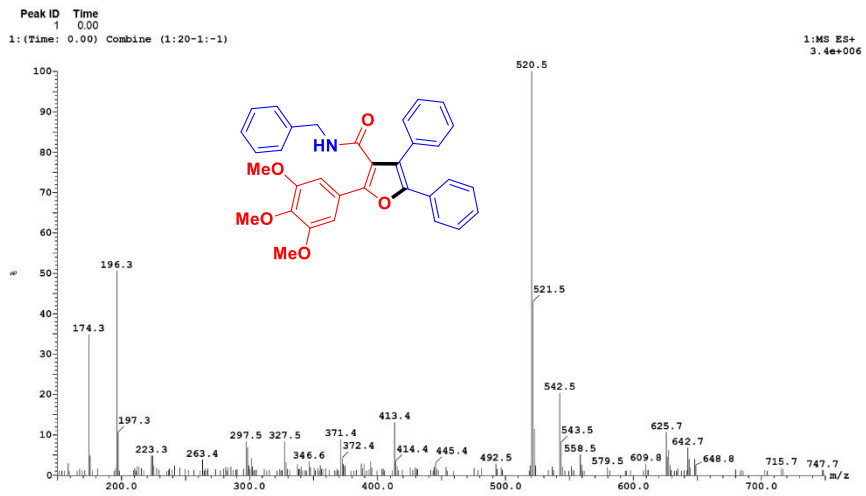

<sup>1</sup>H NMR spectrum of compound- 6 (400 MHz, DMSO-d<sub>6</sub>)

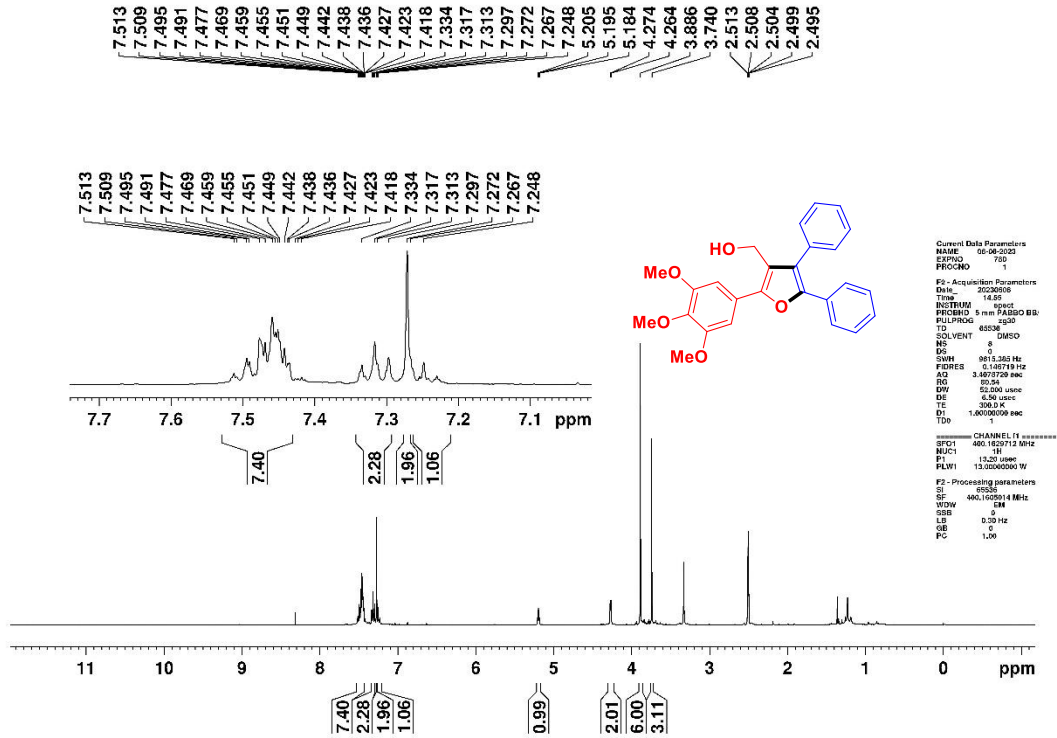

<sup>13</sup>C NMR spectrum of compound- 6 (100 MHz, DMSO-d<sub>6</sub>)

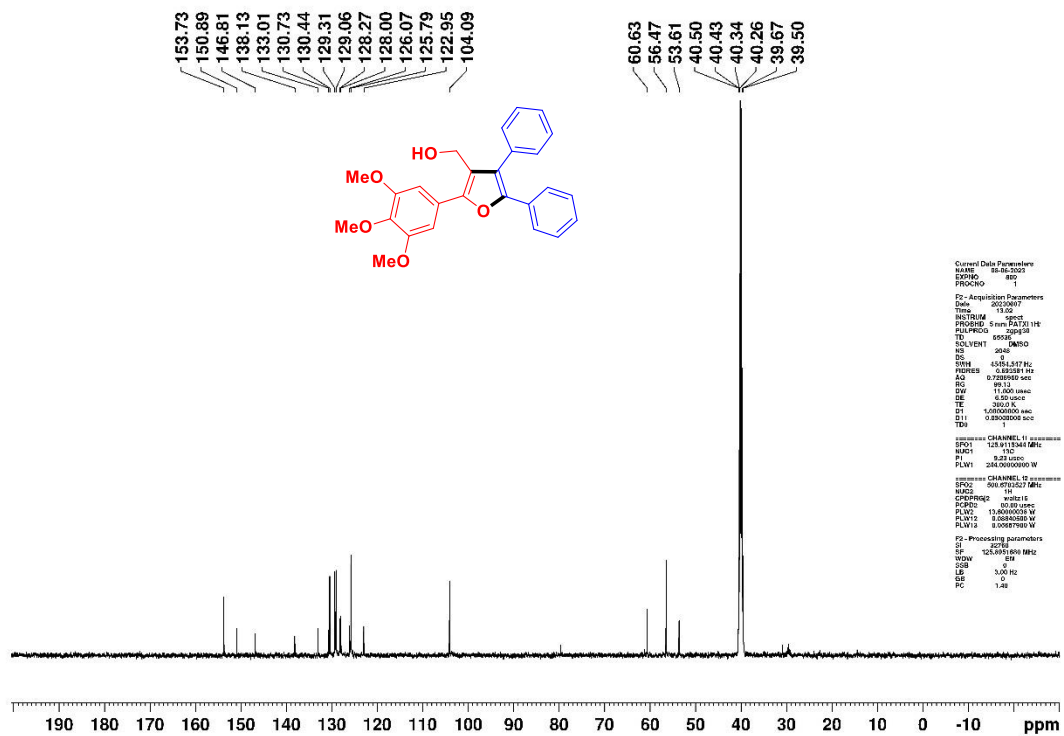

<sup>1</sup>H NMR spectrum of compound- 7 (400 MHz, CDCl<sub>3</sub>)

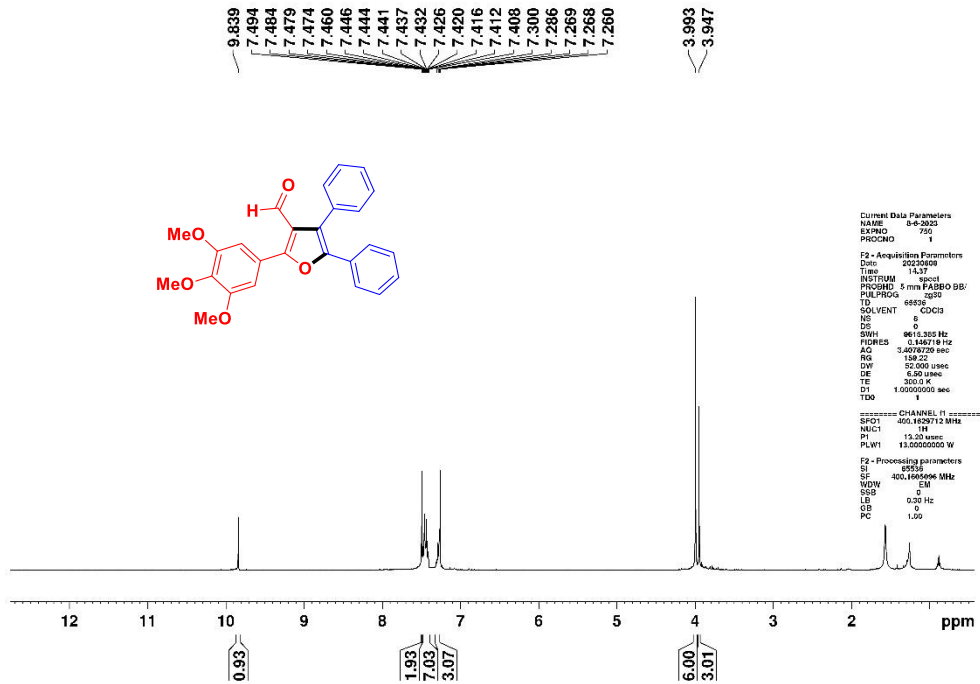

<sup>13</sup>C NMR spectrum of compound- 7 (100 MHz, CDCl<sub>3</sub>)

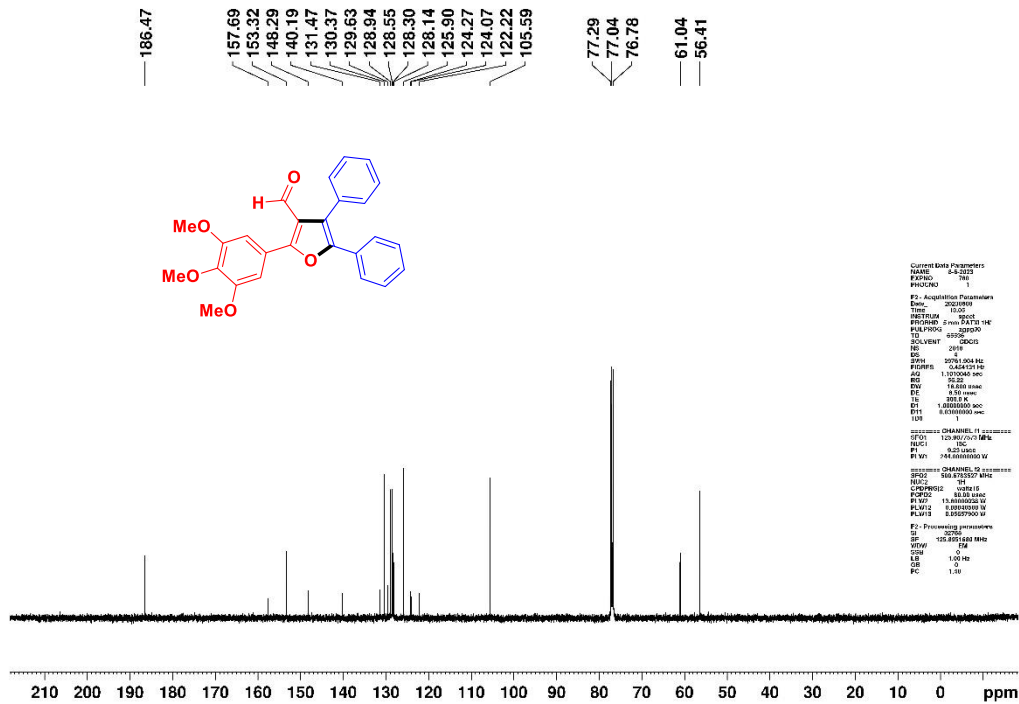



## ESMS spectrum of compound-7

Openlynx Report SAIF, CSIR-CDRI, LUCKNOW

Sample: 332  
File: ESMS23108JUN18  
Description: TNMC-UNN61AD

Vial: 1:B,6  
Date: 08-Jun-2023

ID: ESMS23108JUN18  
Time: 11:55:21

Page 1

Printed: Thu Jun 08 14:38:07 2023

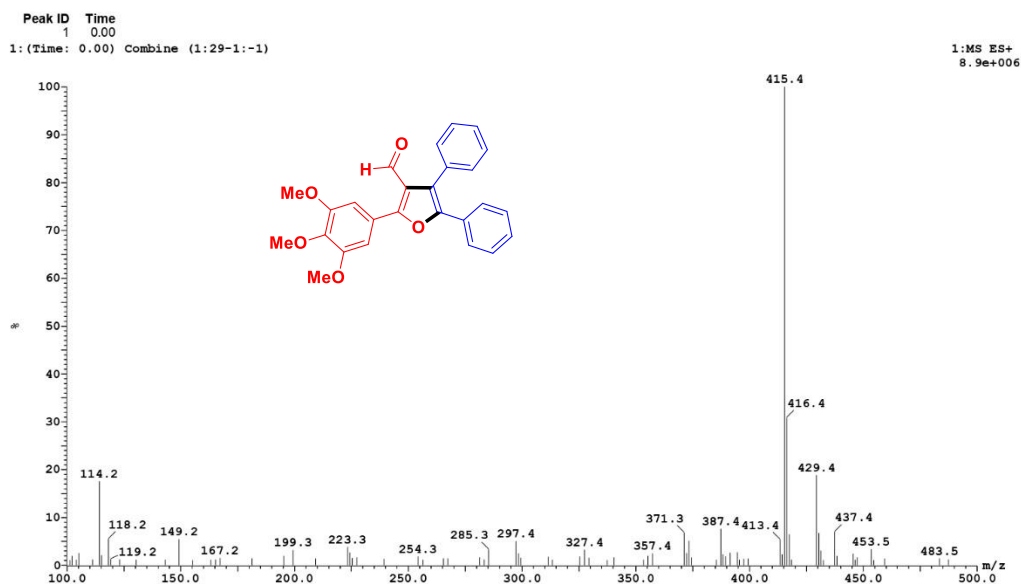

### Control experiments:

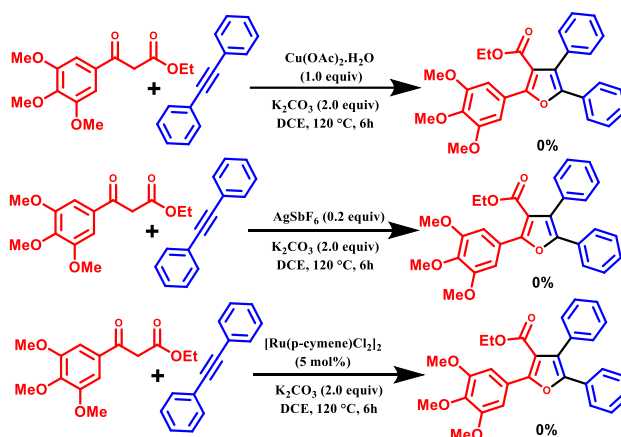

Supplement: d3cc00975k1.pdf [file d3cc00975k1.pdf]
